# Supplementary material for: Synthesis of N-substituted quaternary carbon centers through KOt-Bu-catalyzed aza-Michael addition of pyrazoles to cyclic enones
Source: Royal Society of Chemistry journal article supplement (doi:10.1039/d2ob01634f), 2022-01-01
Supplement: d2ob01634f1.pdf [file d2ob01634f1.pdf]

# Synthesis of *N*-substituted quaternary carbon centers through *KOt*-Bu-catalyzed aza-Michael addition of pyrazoles to cyclic enones

Subin Yoon,<sup>a</sup> Sungbin Lee,<sup>a</sup> Seung Hyun Nam,<sup>a</sup> Hyejeong Lee\*<sup>b</sup> and Yunmi Lee\*<sup>a</sup>

<sup>a</sup>*Department of Chemistry, Kwangwoon University, Seoul 01897, Republic of Korea*

<sup>b</sup>*College of Pharmacy, Duksung Women's University, Seoul 01369, Republic of Korea.*

## Supplementary Information

### Table of Contents

- |                                                                                                          |     |
|----------------------------------------------------------------------------------------------------------|-----|
| 1. Copies of <sup>1</sup> H and <sup>13</sup> C NMR spectra for all products                             | S2  |
| 2. 2D-NOESY proton NMR spectra of compound <b>3af</b> , <b>3ah</b> and <sup>1</sup> H NOESY correlations | S36 |

■ Copies of  $^1\text{H}$  and  $^{13}\text{C}$  NMR spectra for all products

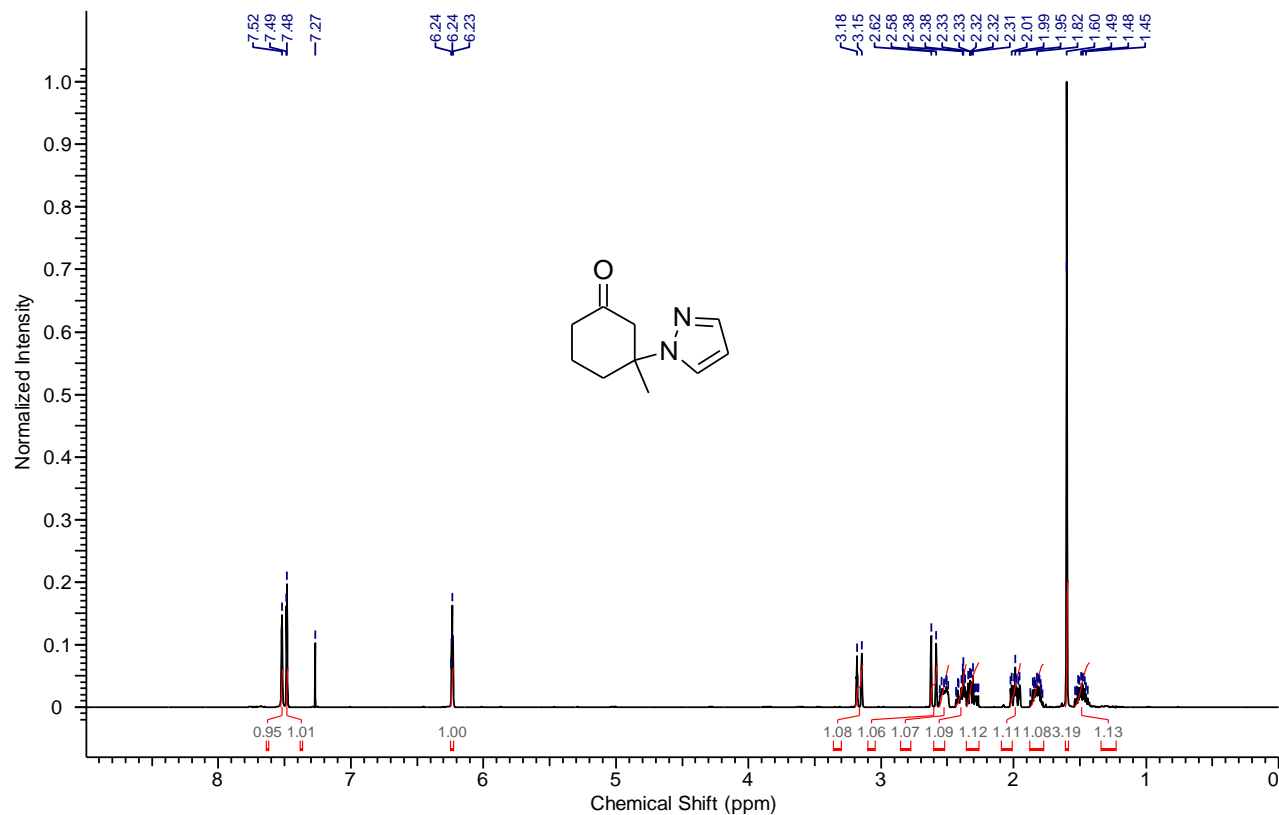

Figure S1.  $^1\text{H}$  NMR spectrum of the compound 3aa in  $\text{CDCl}_3$ , 400 MHz

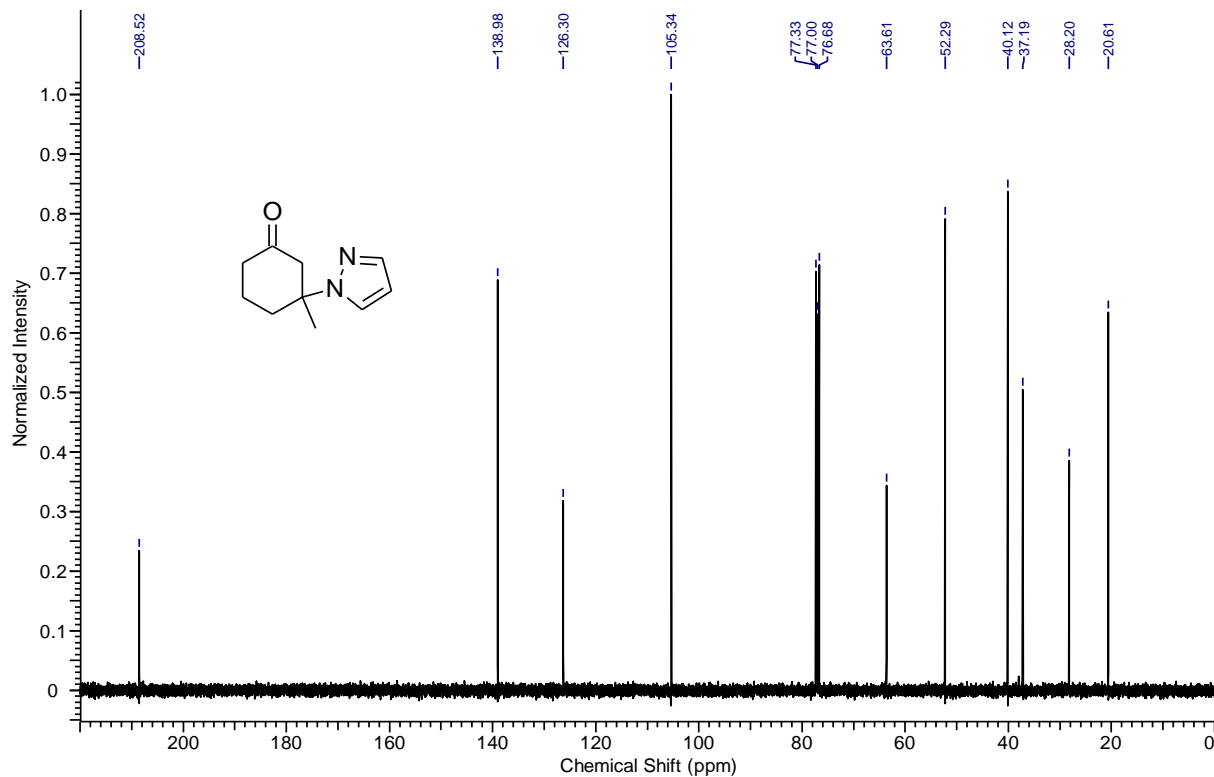

Figure S2.  $^{13}\text{C}$  NMR spectrum of the compound 3aa in  $\text{CDCl}_3$ , 100 MHz

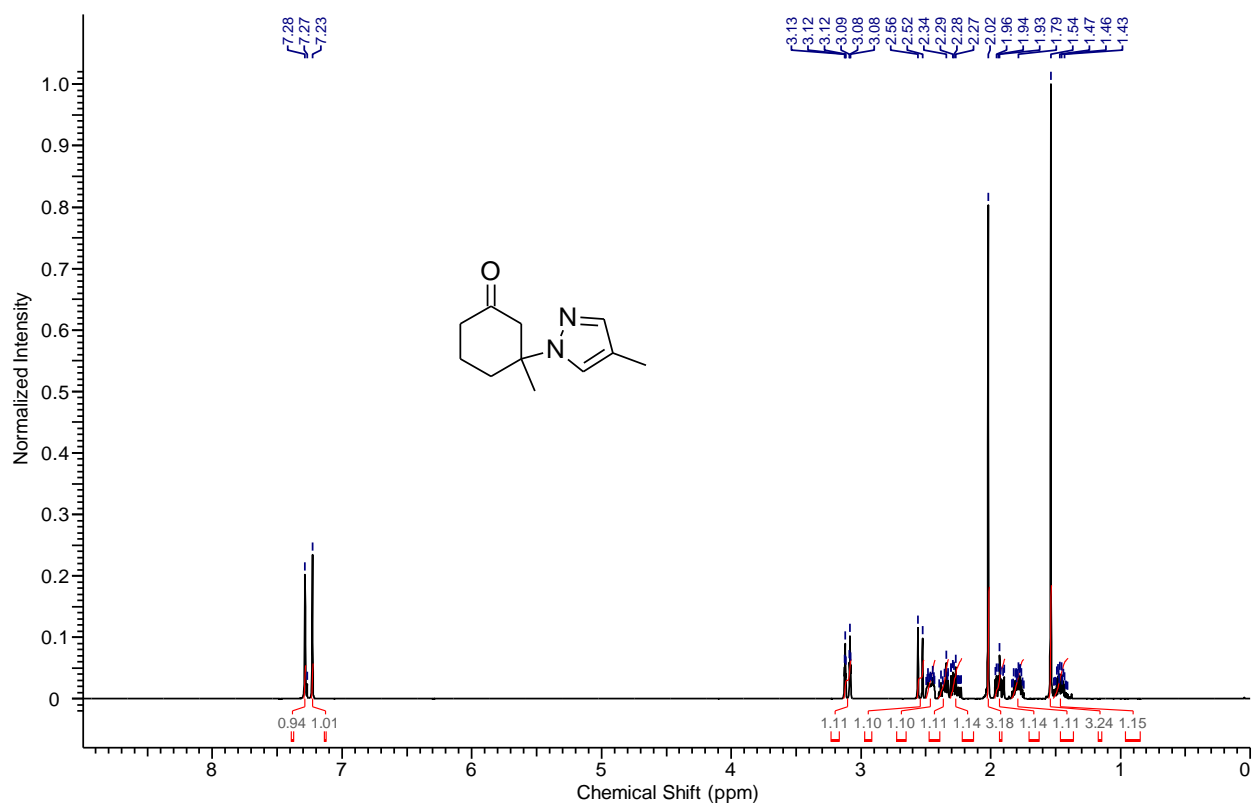

**Figure S3.**  $^1\text{H}$  NMR spectrum of the compound **3ab** in  $\text{CDCl}_3$ , 400 MHz

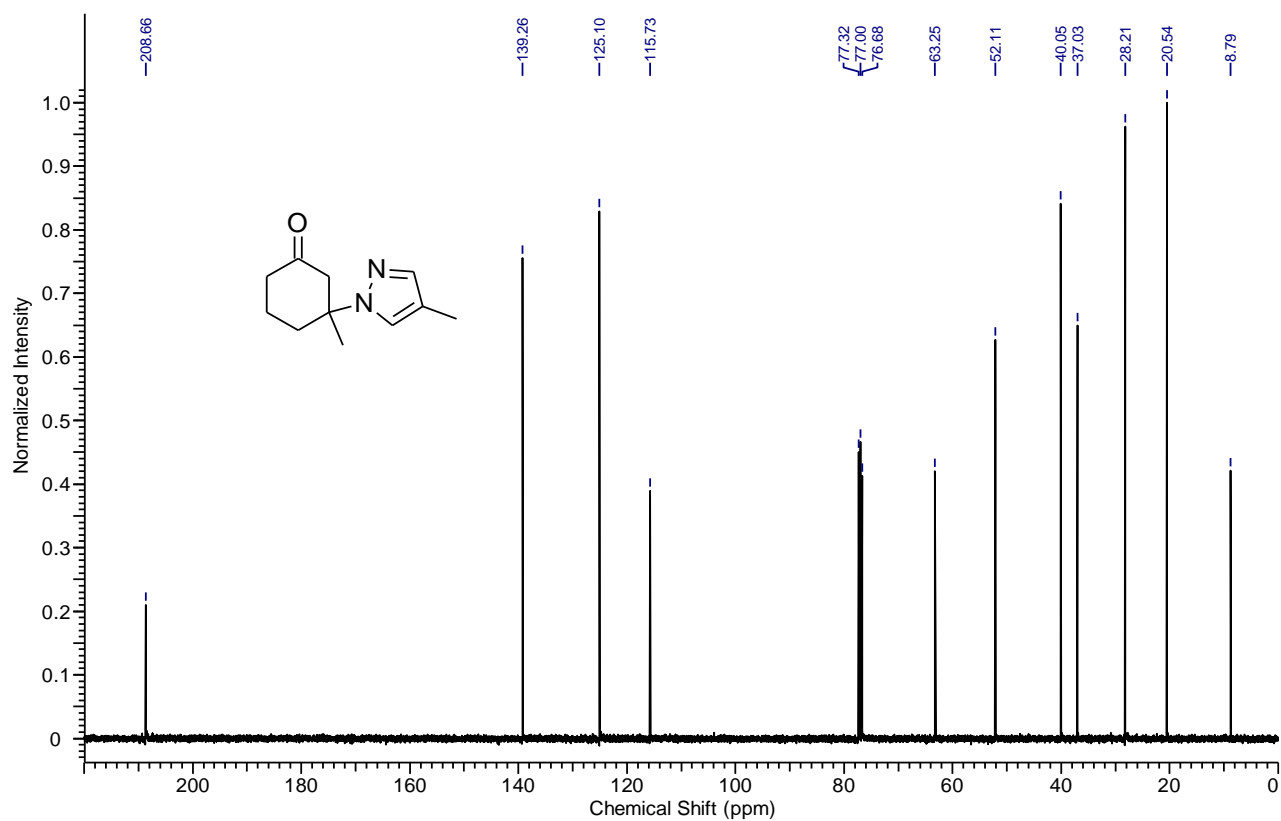

**Figure S4.**  $^{13}\text{C}$  NMR spectrum of the compound **3ab** in  $\text{CDCl}_3$ , 100 MHz

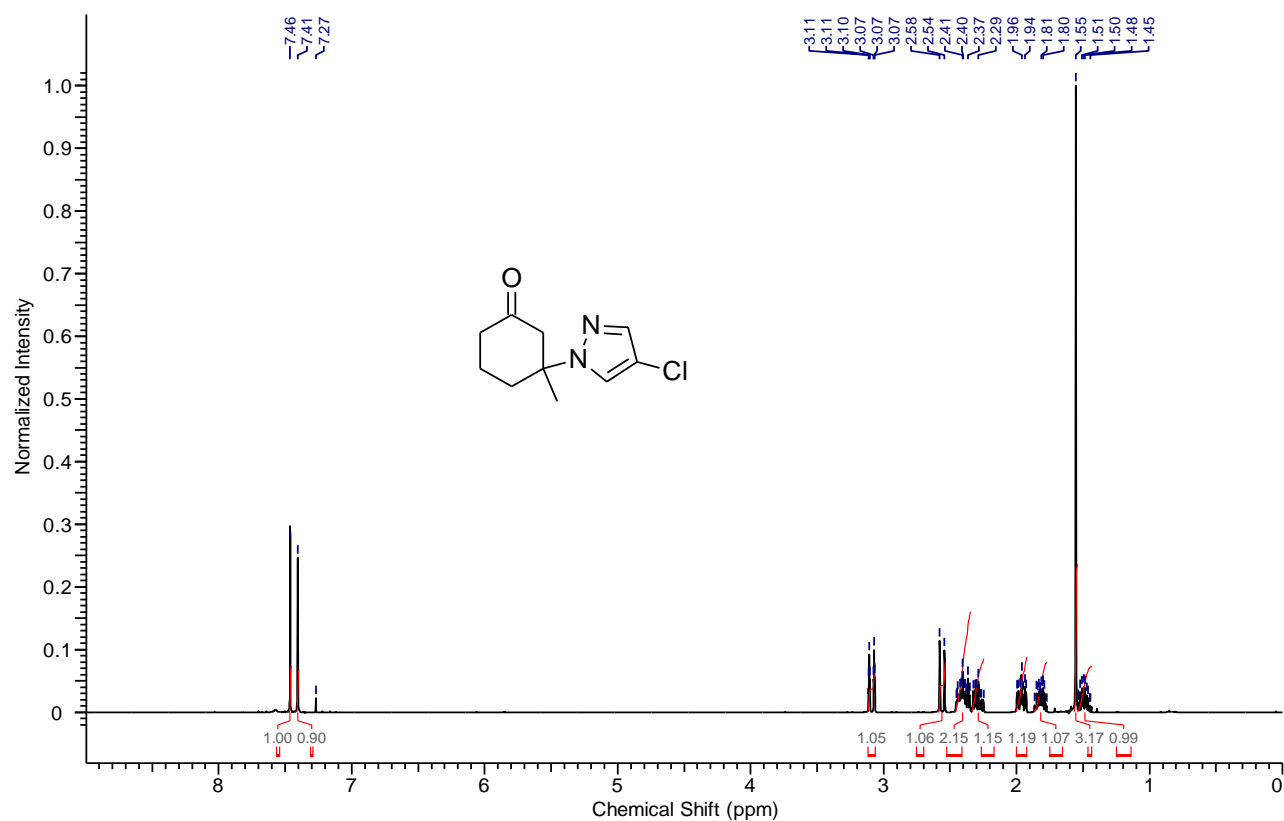

**Figure S5.** <sup>1</sup>H NMR spectrum of the compound **3ac** in CDCl<sub>3</sub>, 400 MHz

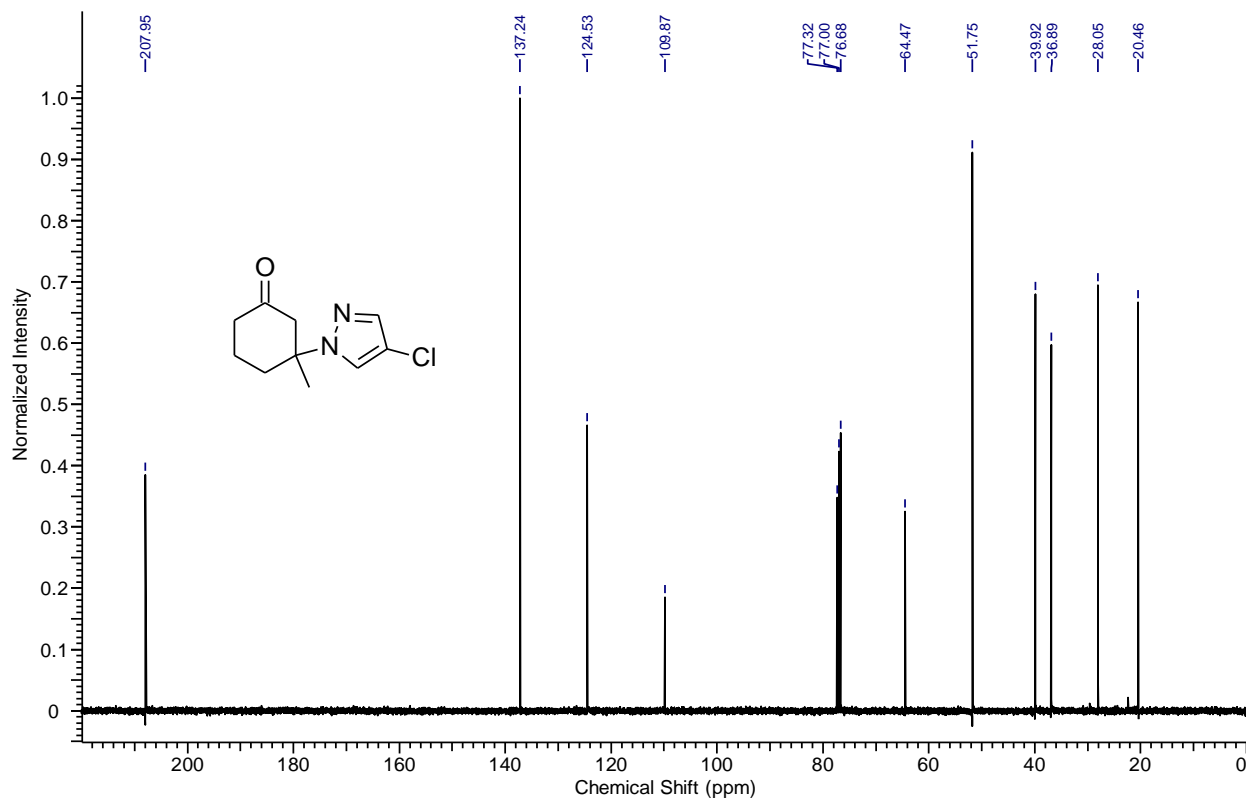

**Figure S6.** <sup>13</sup>C NMR spectrum of the compound **3ac** in CDCl<sub>3</sub>, 100 MHz

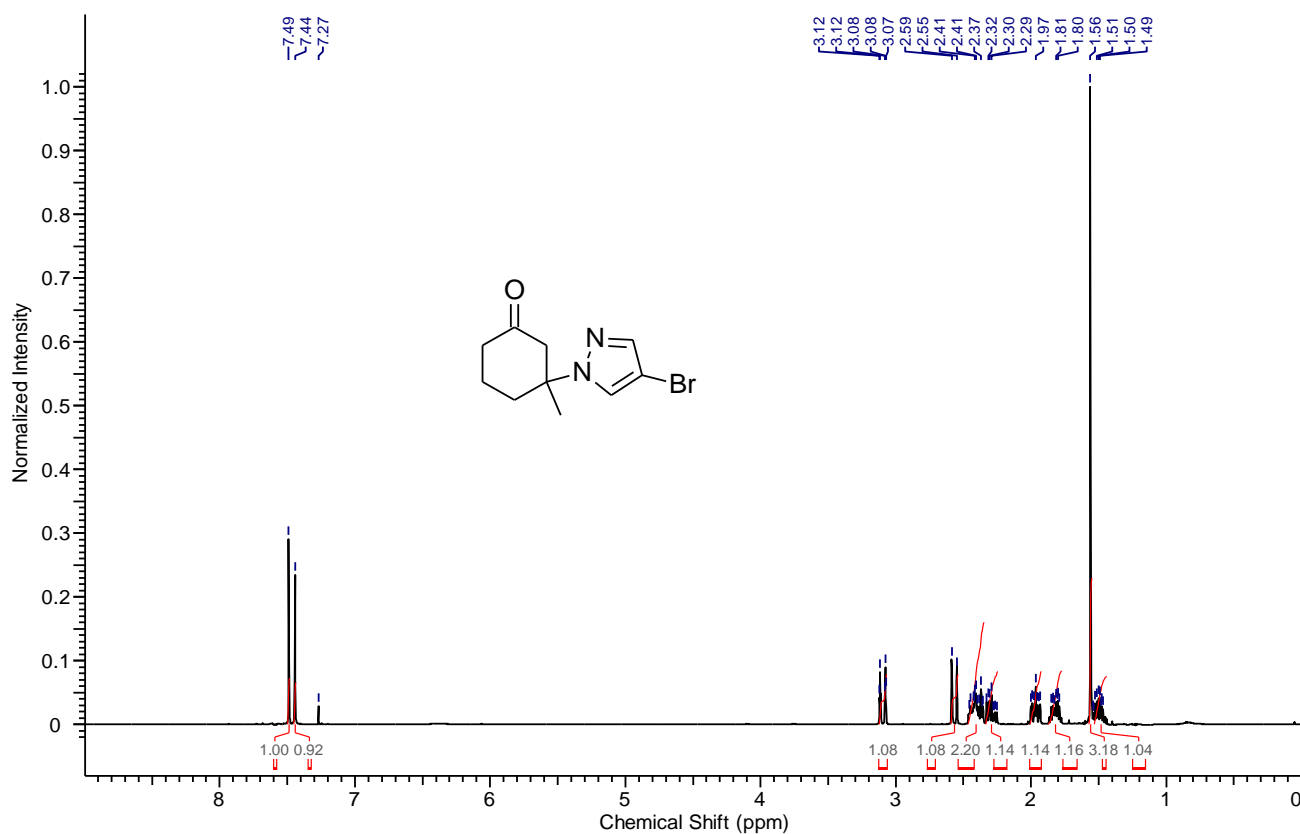

**Figure S7.**  $^1\text{H}$  NMR spectrum of the compound **3ad** in  $\text{CDCl}_3$ , 400 MHz

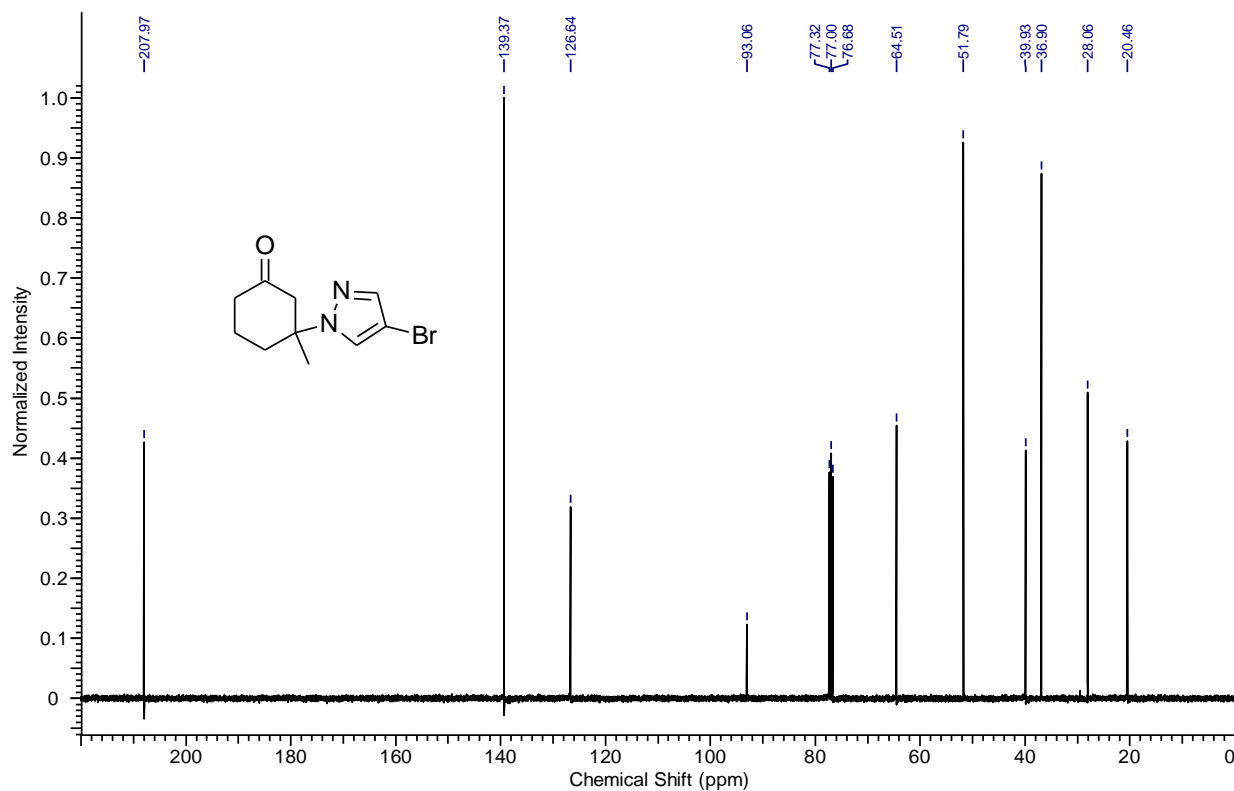

**Figure S8.**  $^{13}\text{C}$  NMR spectrum of the compound **3ad** in  $\text{CDCl}_3$ , 100 MHz

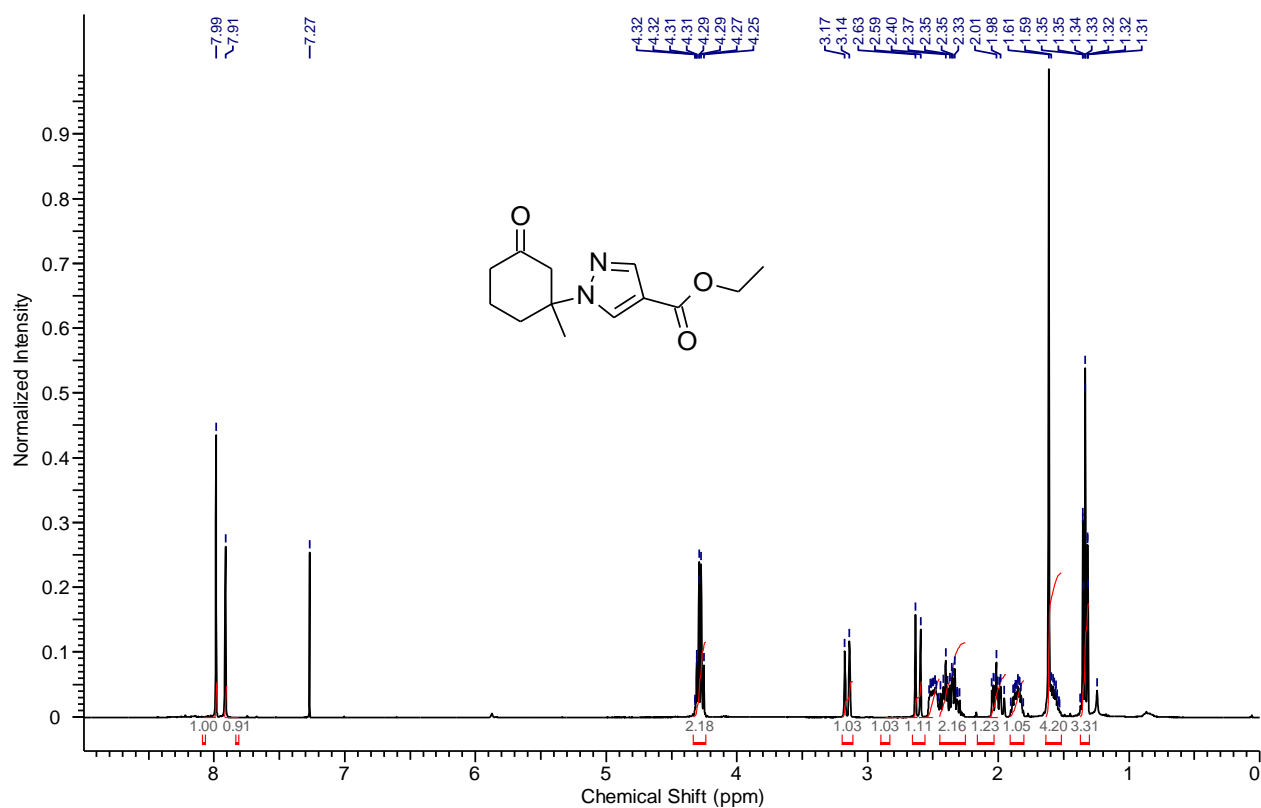

**Figure S9.**  $^1\text{H}$  NMR spectrum of the compound **3ae** in  $\text{CDCl}_3$ , 400 MHz

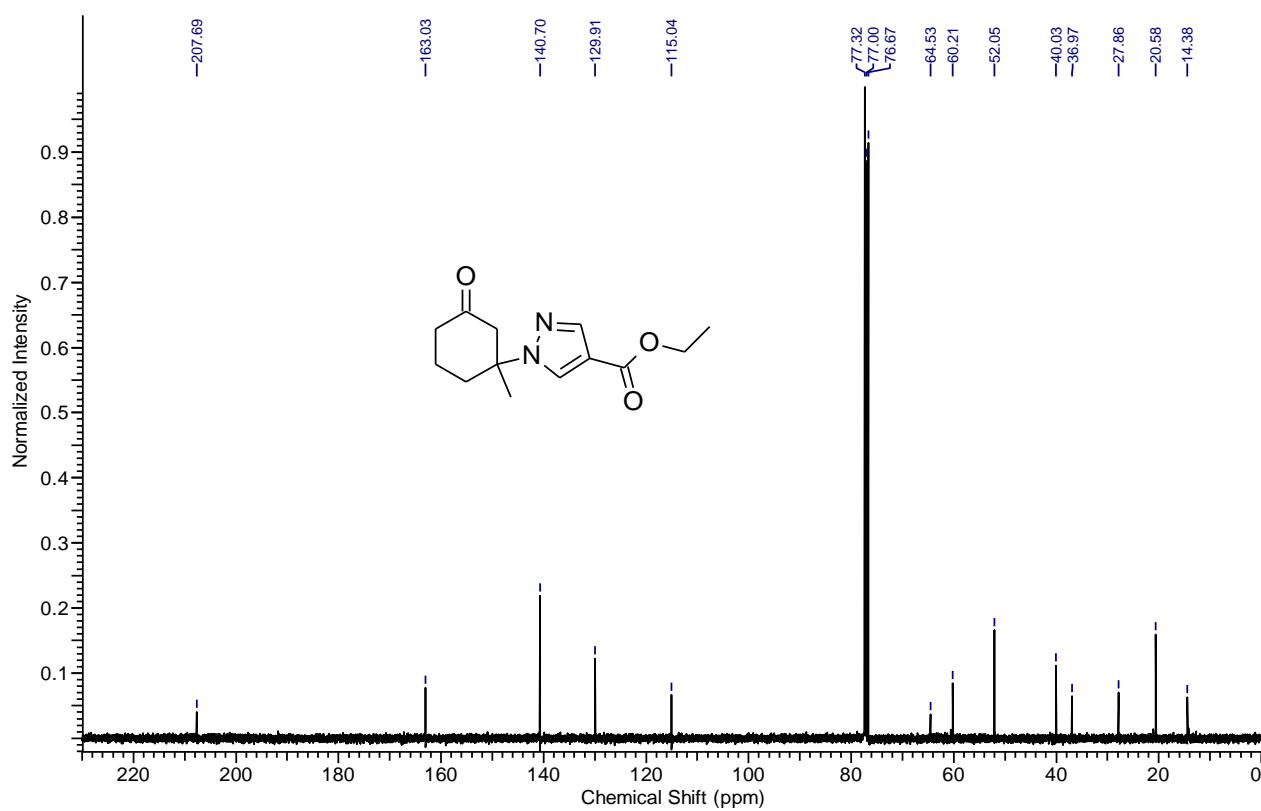

**Figure S10.**  $^{13}\text{C}$  NMR spectrum of the compound **3ae** in  $\text{CDCl}_3$ , 100 MHz

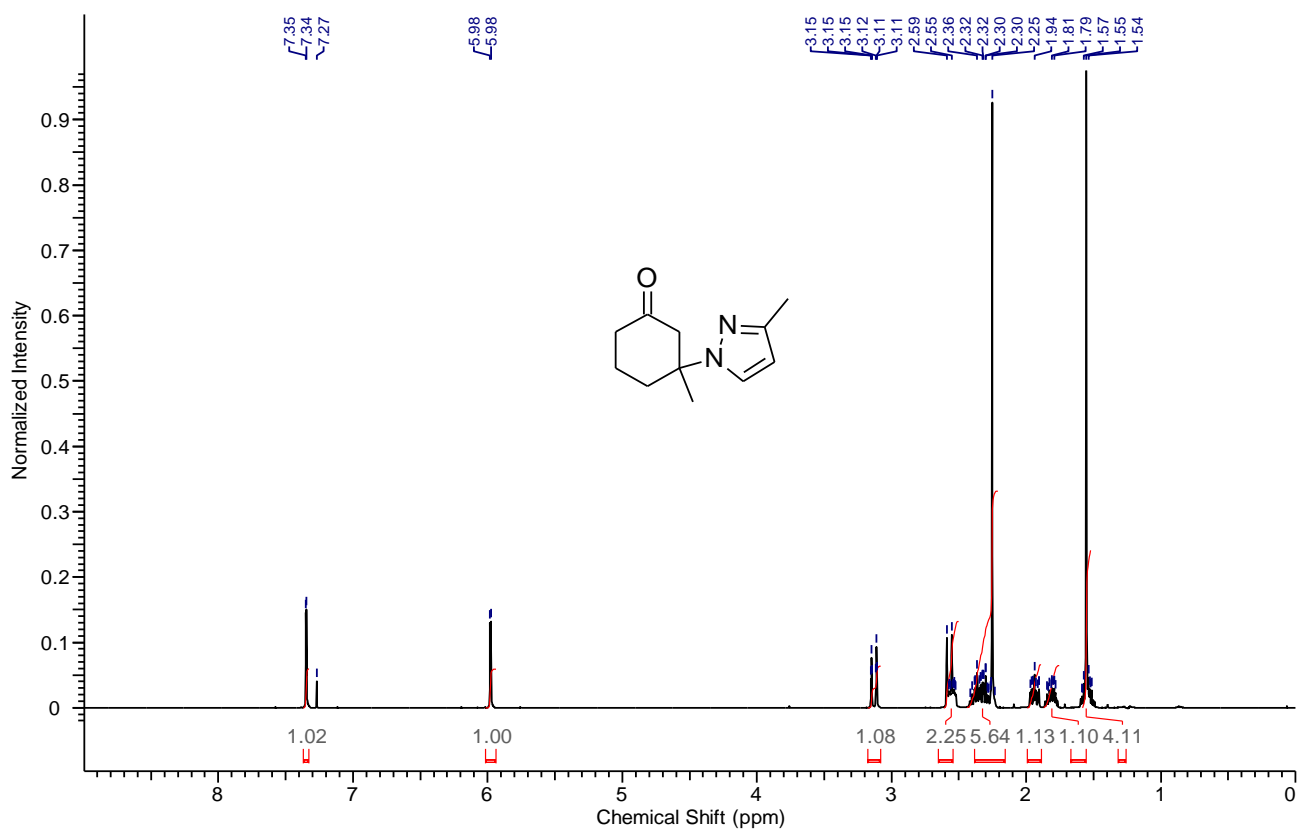

**Figure S11.**  $^1\text{H}$  NMR spectrum of the compound **3af** in  $\text{CDCl}_3$ , 400 MHz

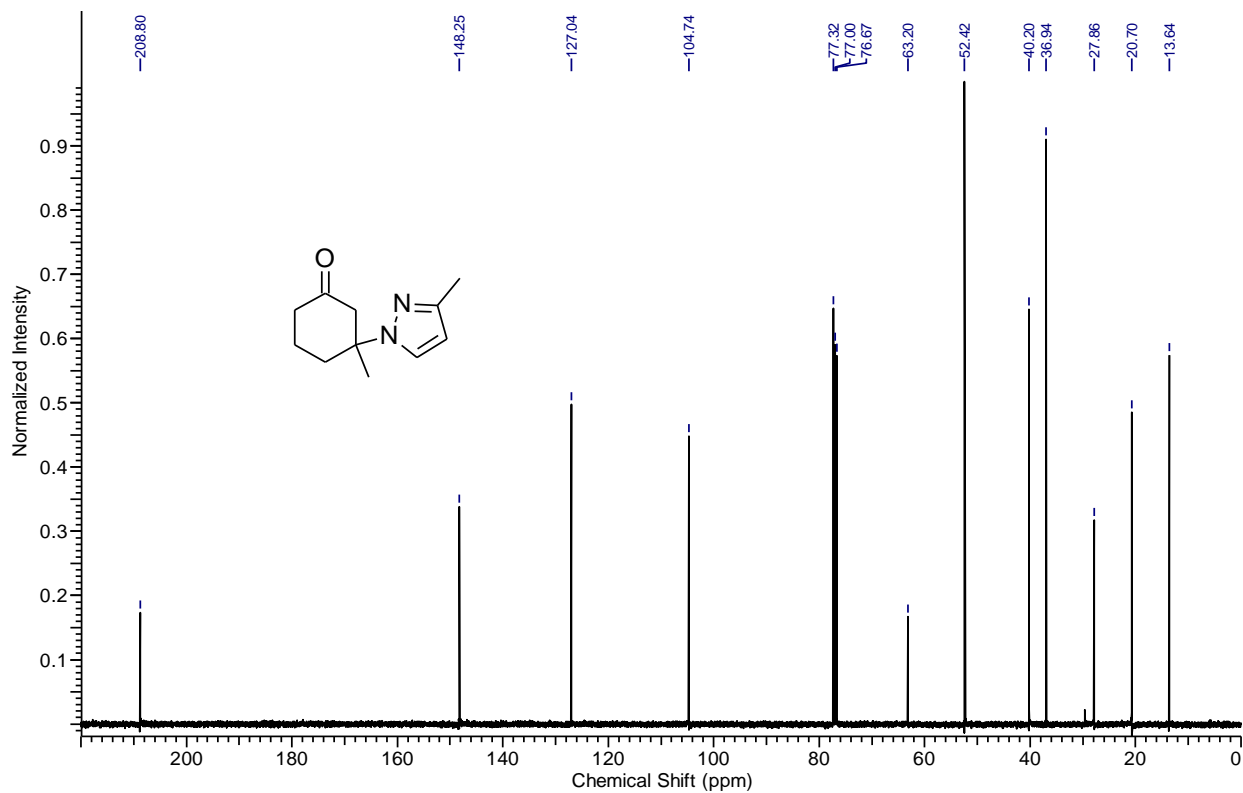

**Figure S12.**  $^{13}\text{C}$  NMR spectrum of the compound **3af** in  $\text{CDCl}_3$ , 100 MHz

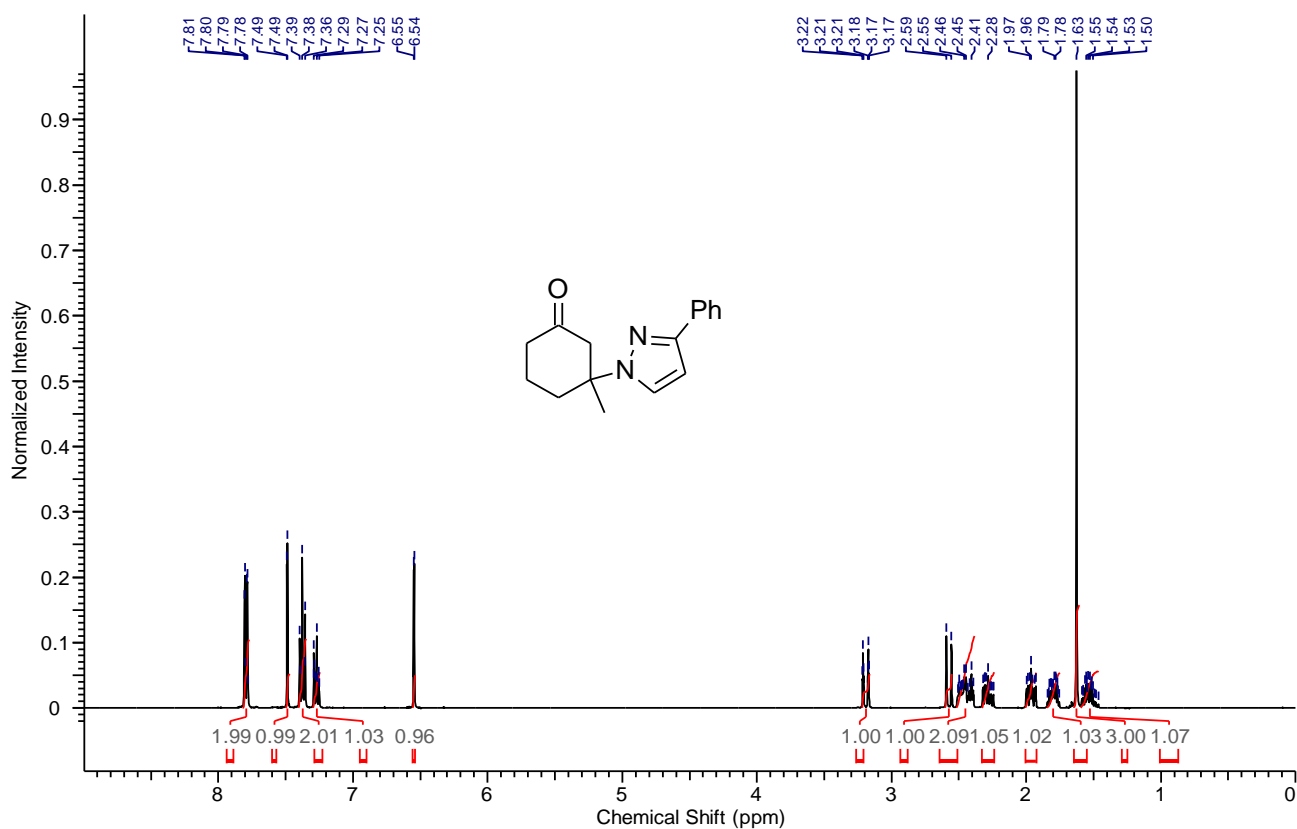

**Figure S13.** <sup>1</sup>H NMR spectrum of the compound **3ah** in CDCl<sub>3</sub>, 400 MHz

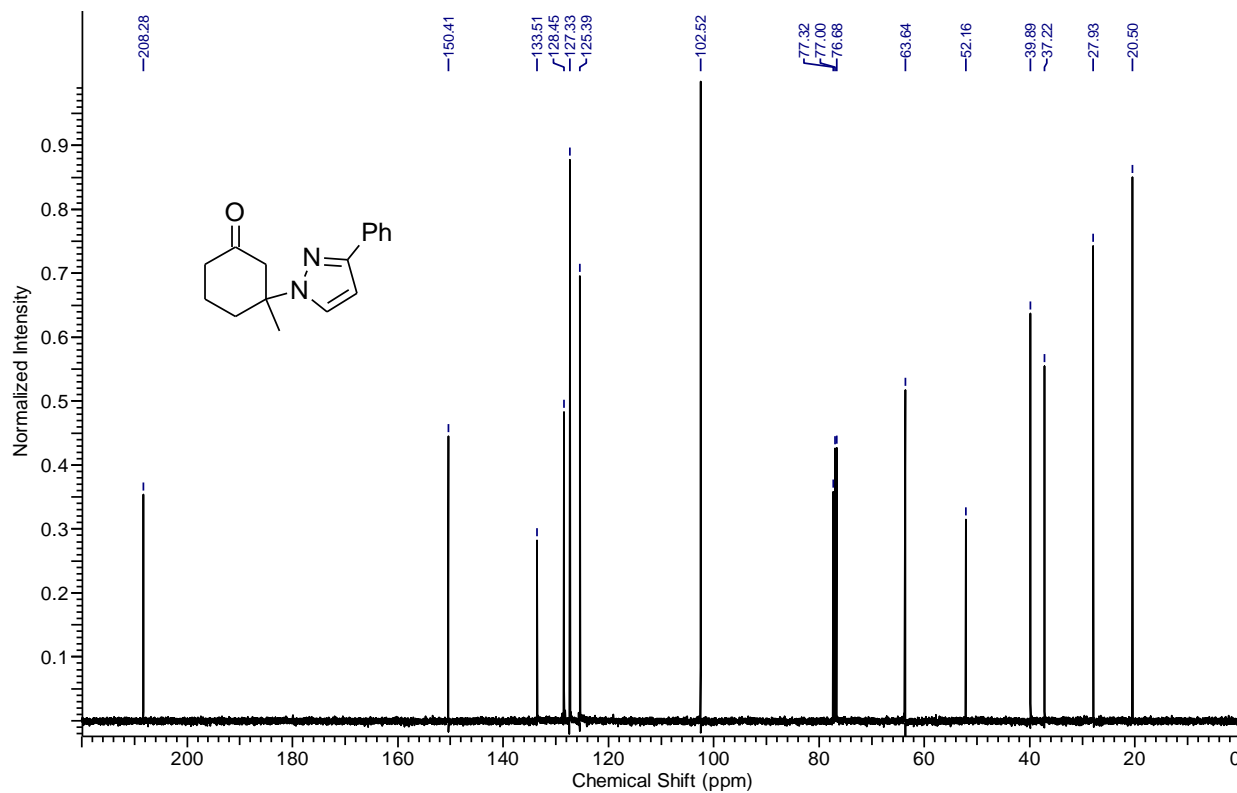

**Figure S14.** <sup>13</sup>C NMR spectrum of the compound **3ah** in CDCl<sub>3</sub>, 100 MHz



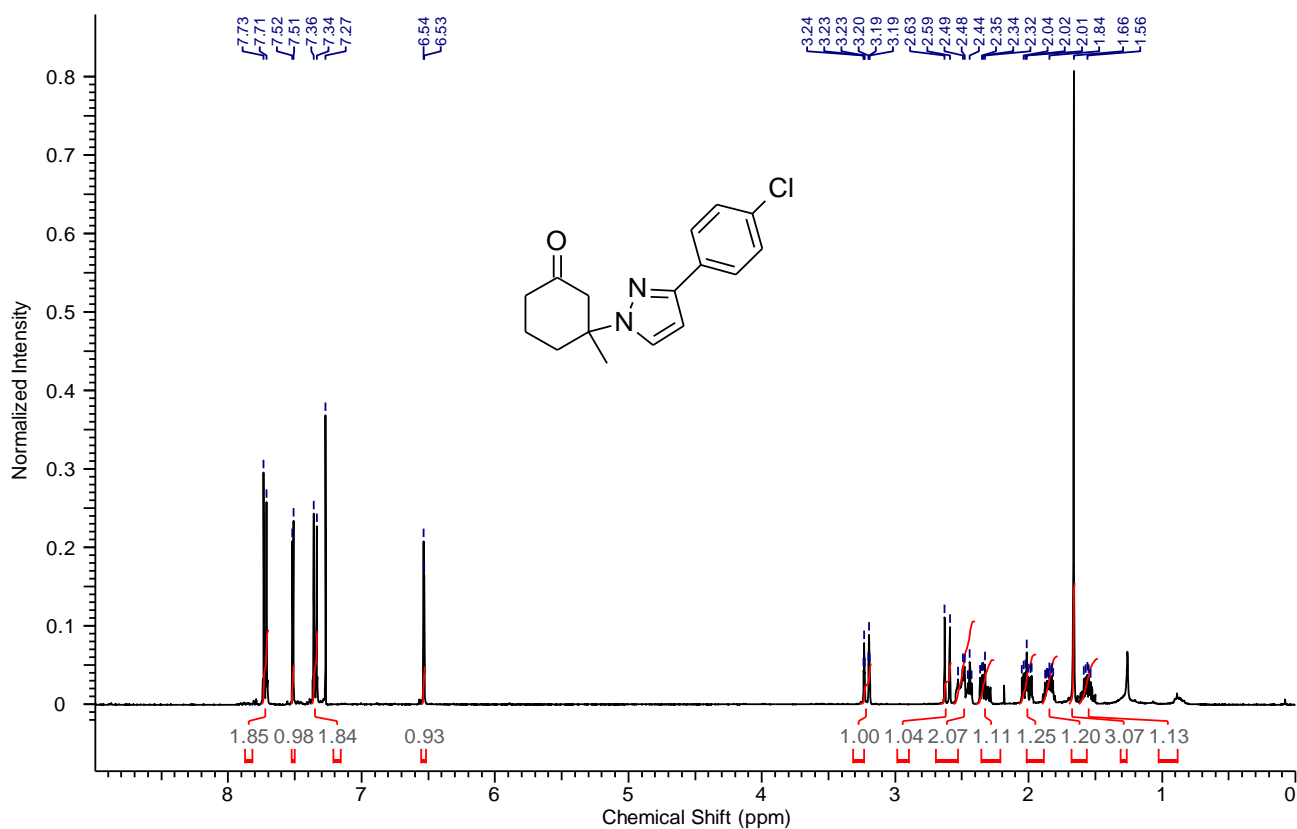

**Figure S15.**  $^1\text{H}$  NMR spectrum of the compound **3ai** in  $\text{CDCl}_3$ , 400 MHz

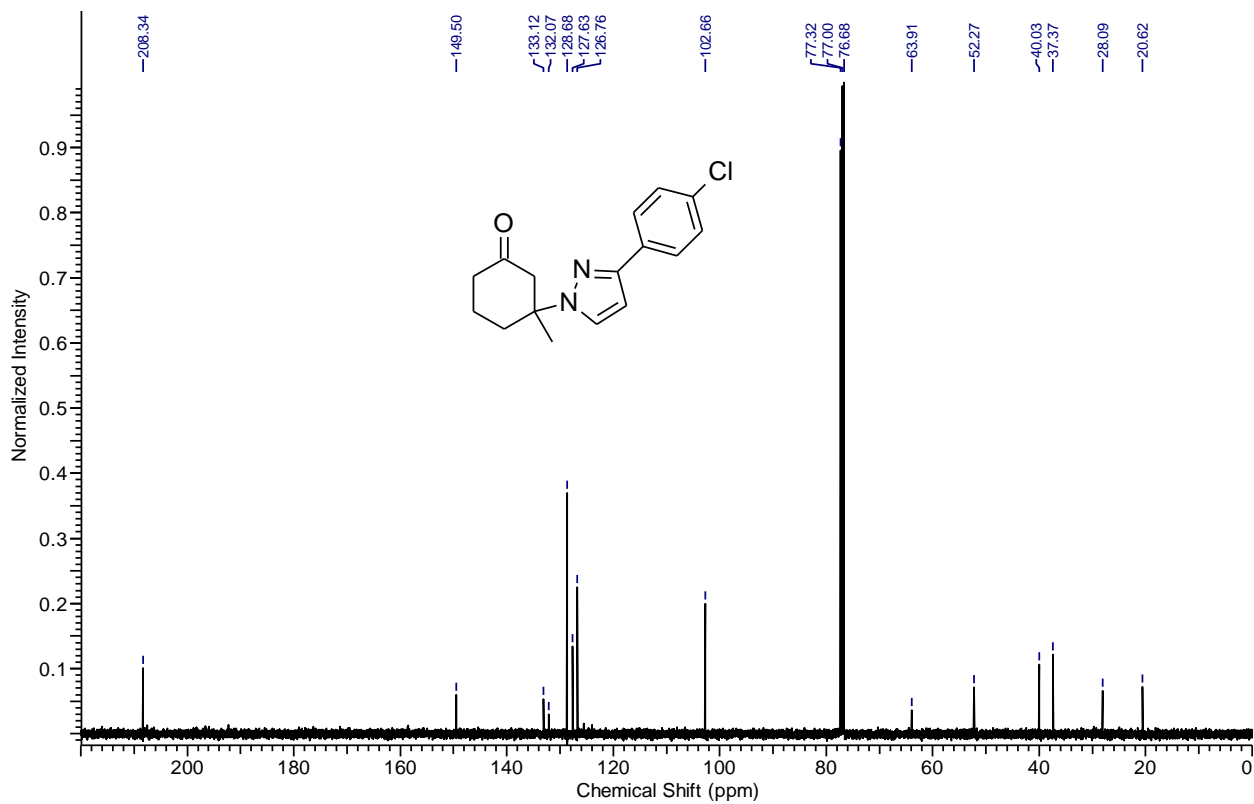

**Figure S16.**  $^{13}\text{C}$  NMR spectrum of the compound **3ai** in  $\text{CDCl}_3$ , 100 MHz

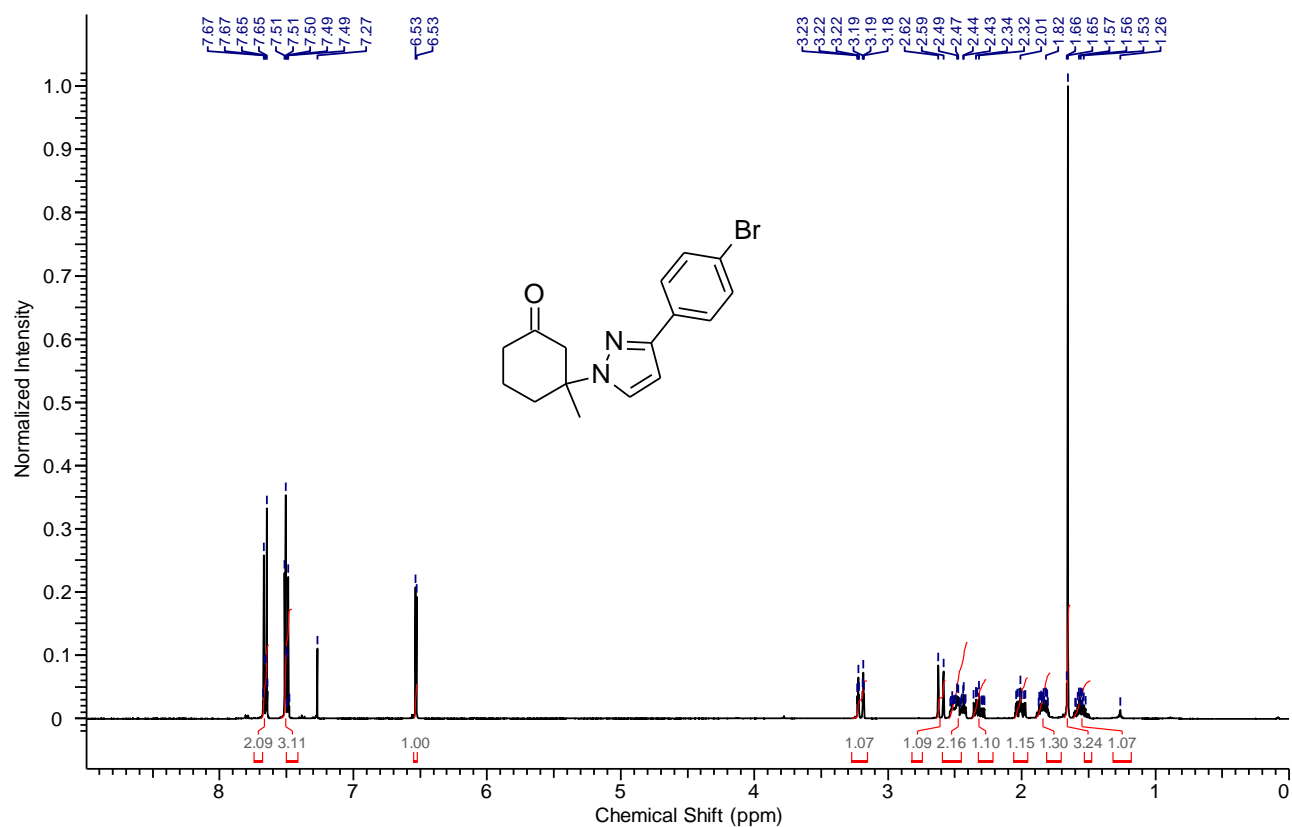

**Figure S17.** <sup>1</sup>H NMR spectrum of the compound **3aj** in CDCl<sub>3</sub>, 400 MHz

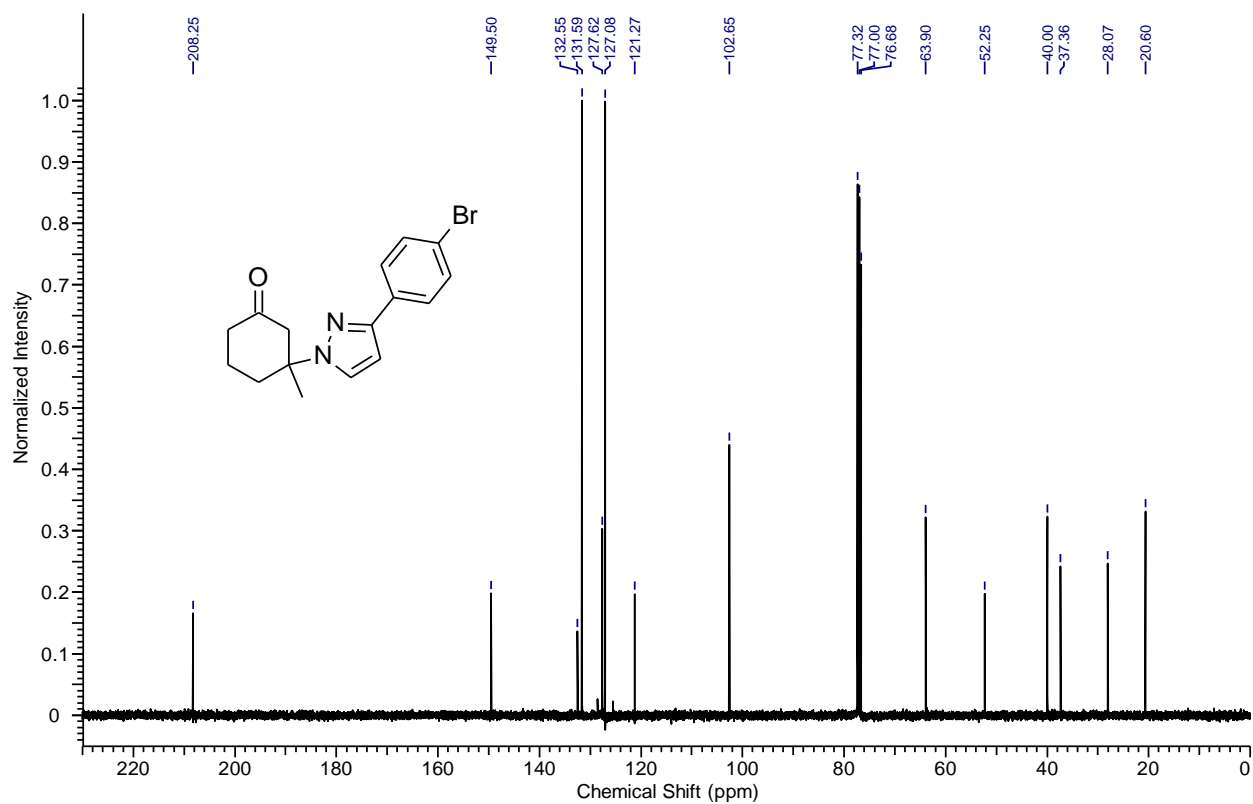

**Figure S18.** <sup>13</sup>C NMR spectrum of the compound **3aj** in CDCl<sub>3</sub>, 100 MHz

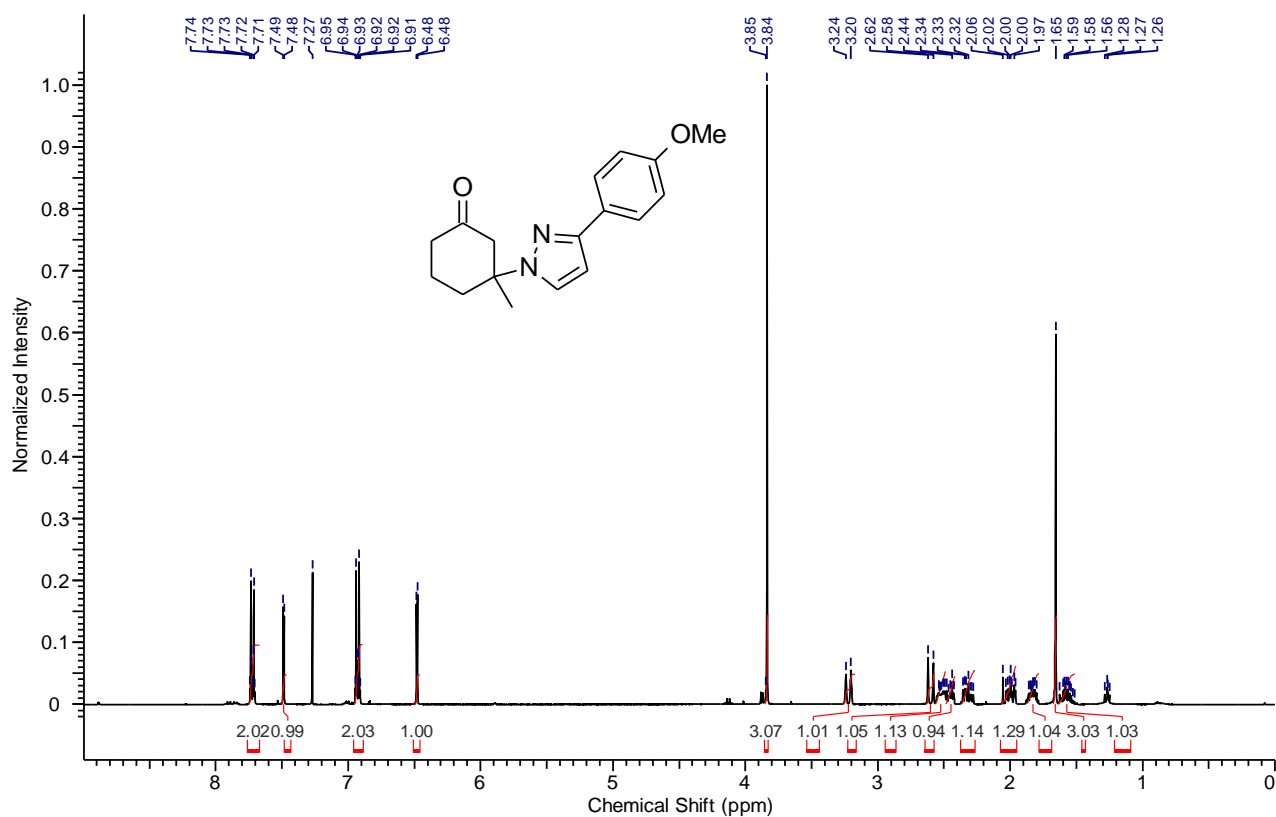

Figure S19.  $^1\text{H}$  NMR spectrum of the compound **3ak** in  $\text{CDCl}_3$ , 400 MHz

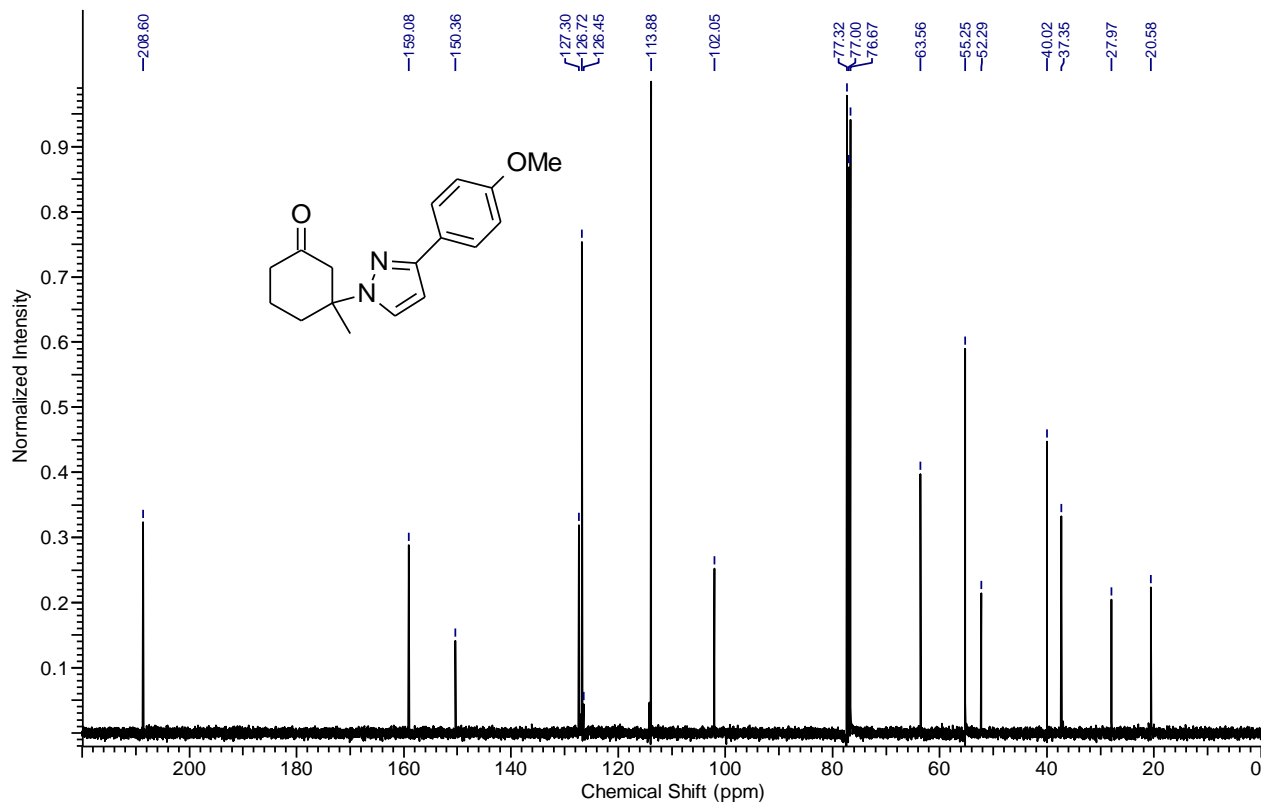

Figure S20.  $^{13}\text{C}$  NMR spectrum of the compound **3ak** in  $\text{CDCl}_3$ , 100 MHz

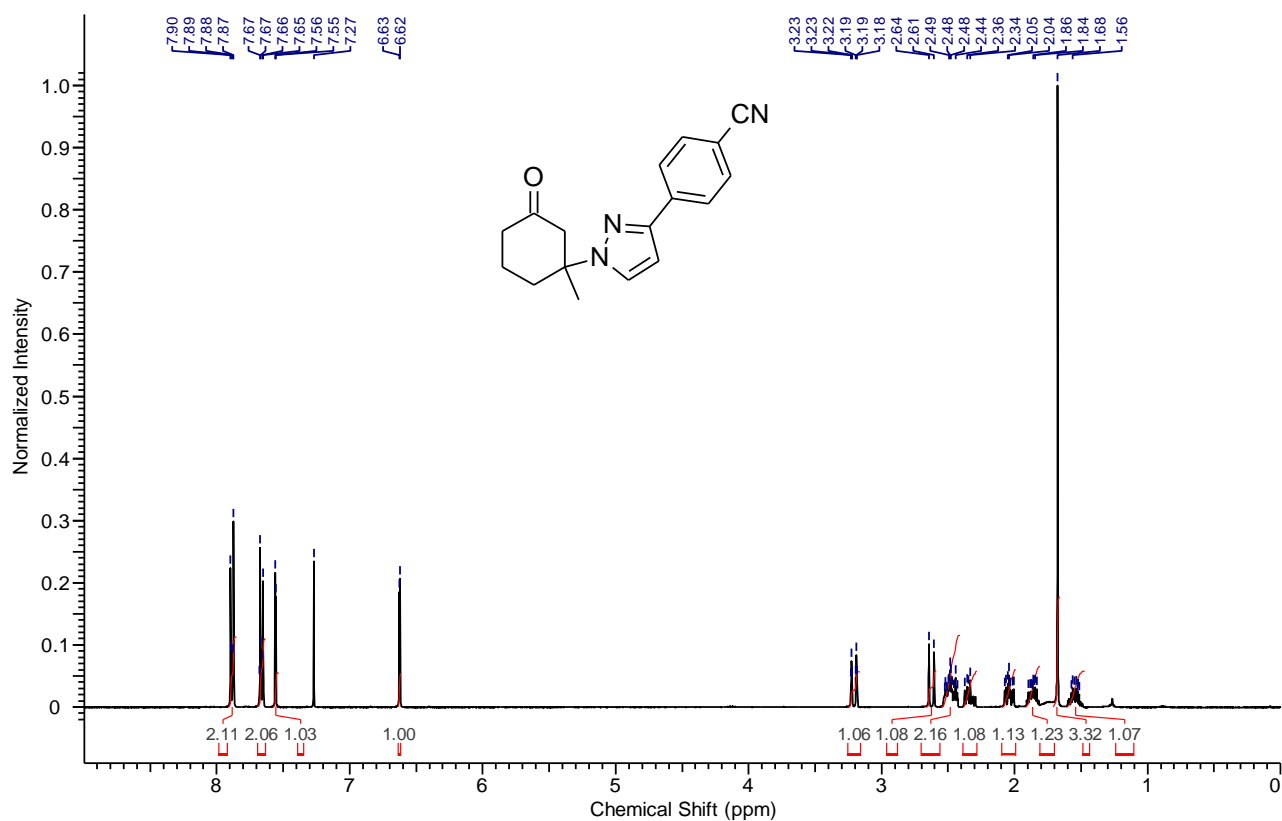

Figure S21. <sup>1</sup>H NMR spectrum of the compound **3al** in CDCl<sub>3</sub>, 400 MHz

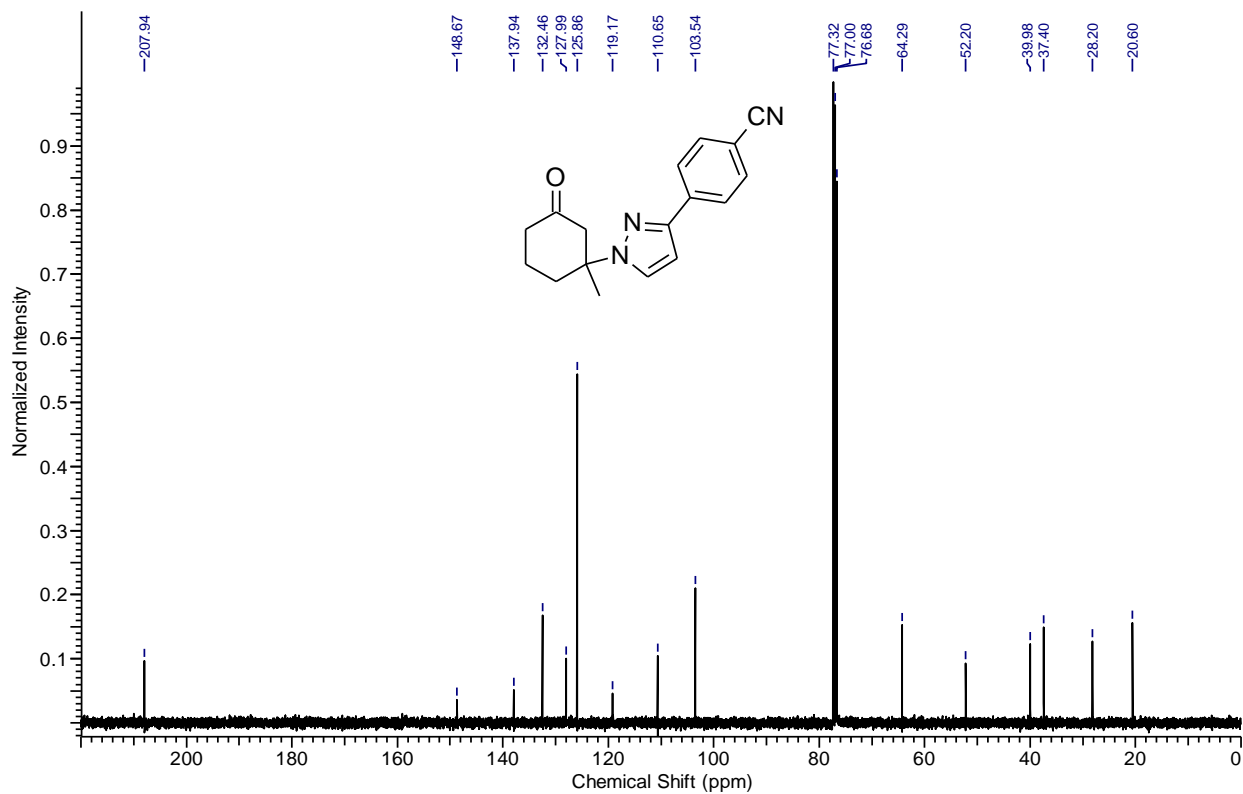

Figure S22. <sup>13</sup>C NMR spectrum of the compound **3al** in CDCl<sub>3</sub>, 100 MHz

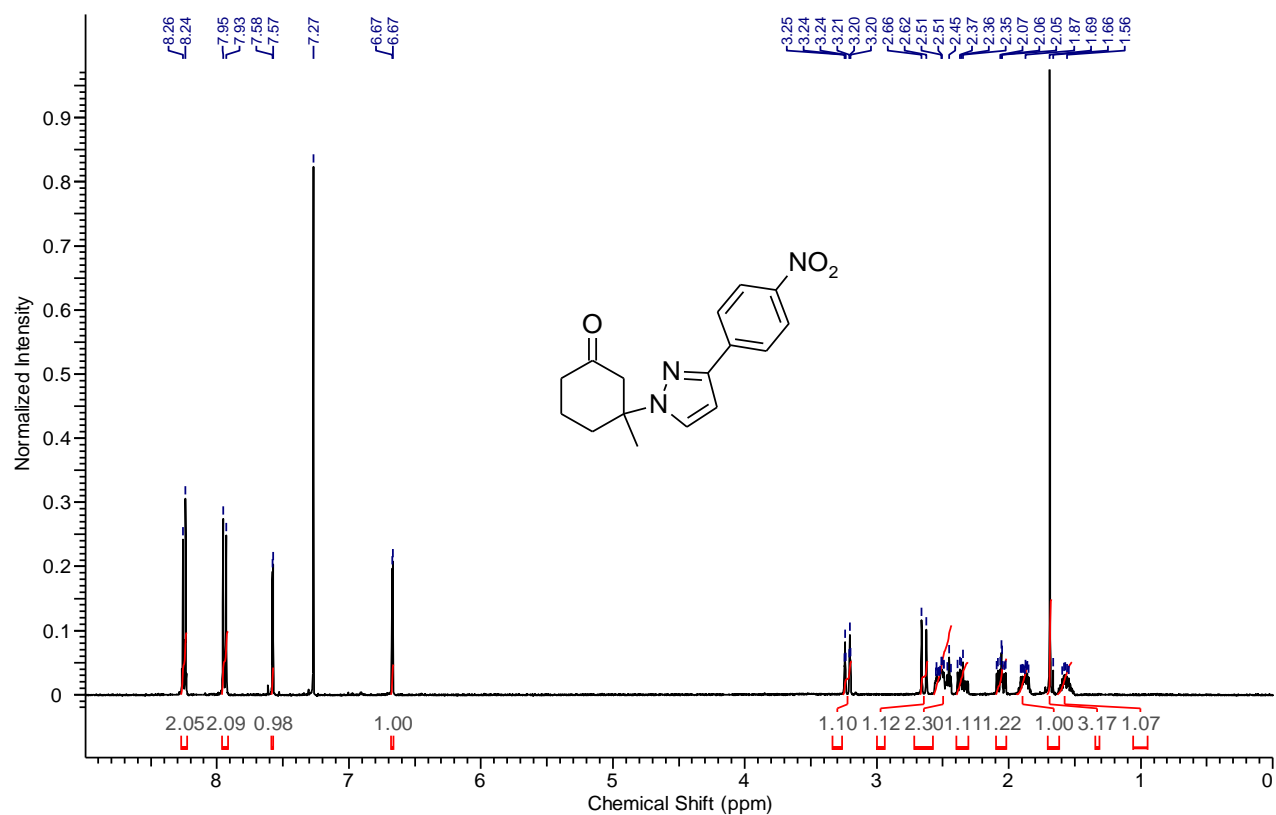

Figure S23.  $^1\text{H}$  NMR spectrum of the compound **3am** in  $\text{CDCl}_3$ , 400 MHz

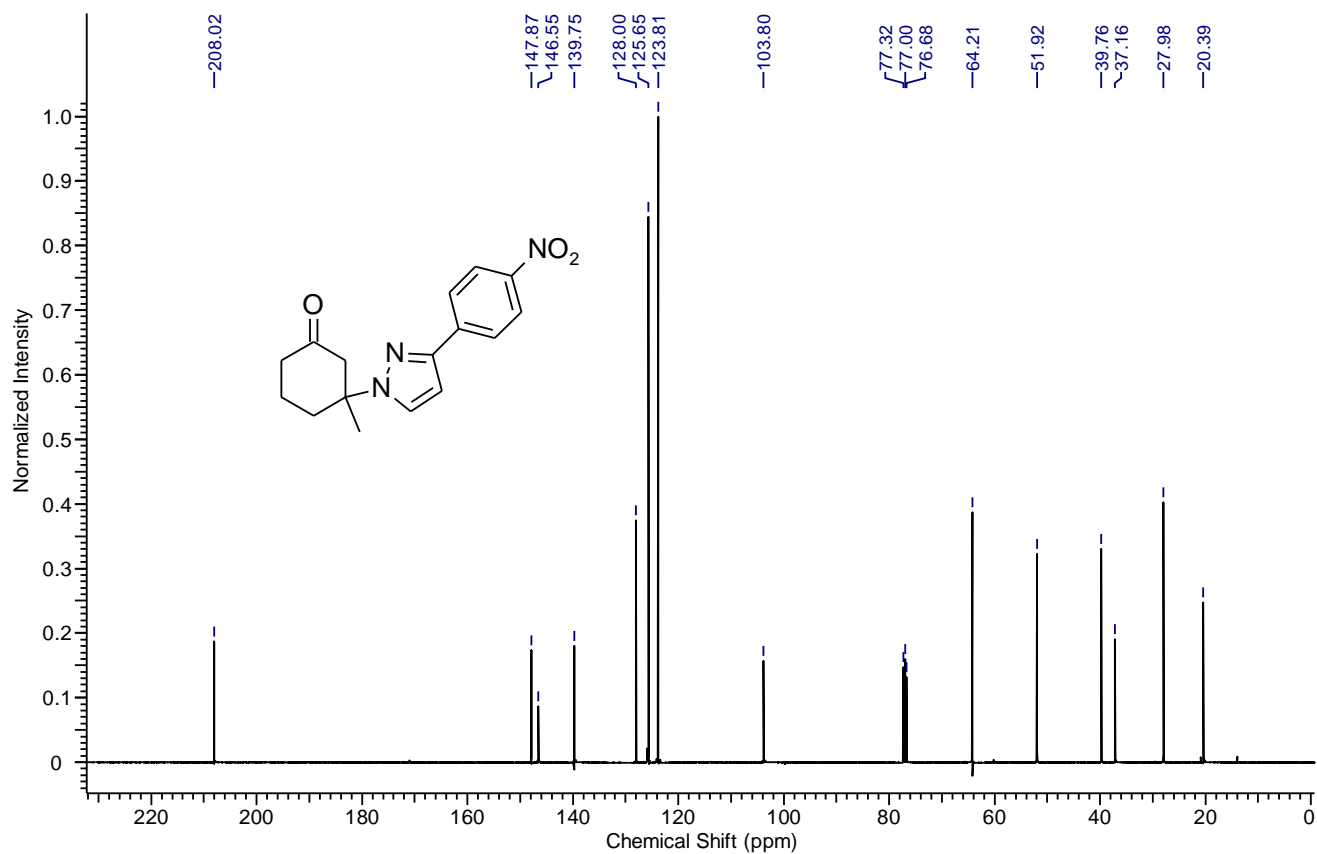

Figure S24.  $^{13}\text{C}$  NMR spectrum of the compound **3am** in  $\text{CDCl}_3$ , 100 MHz

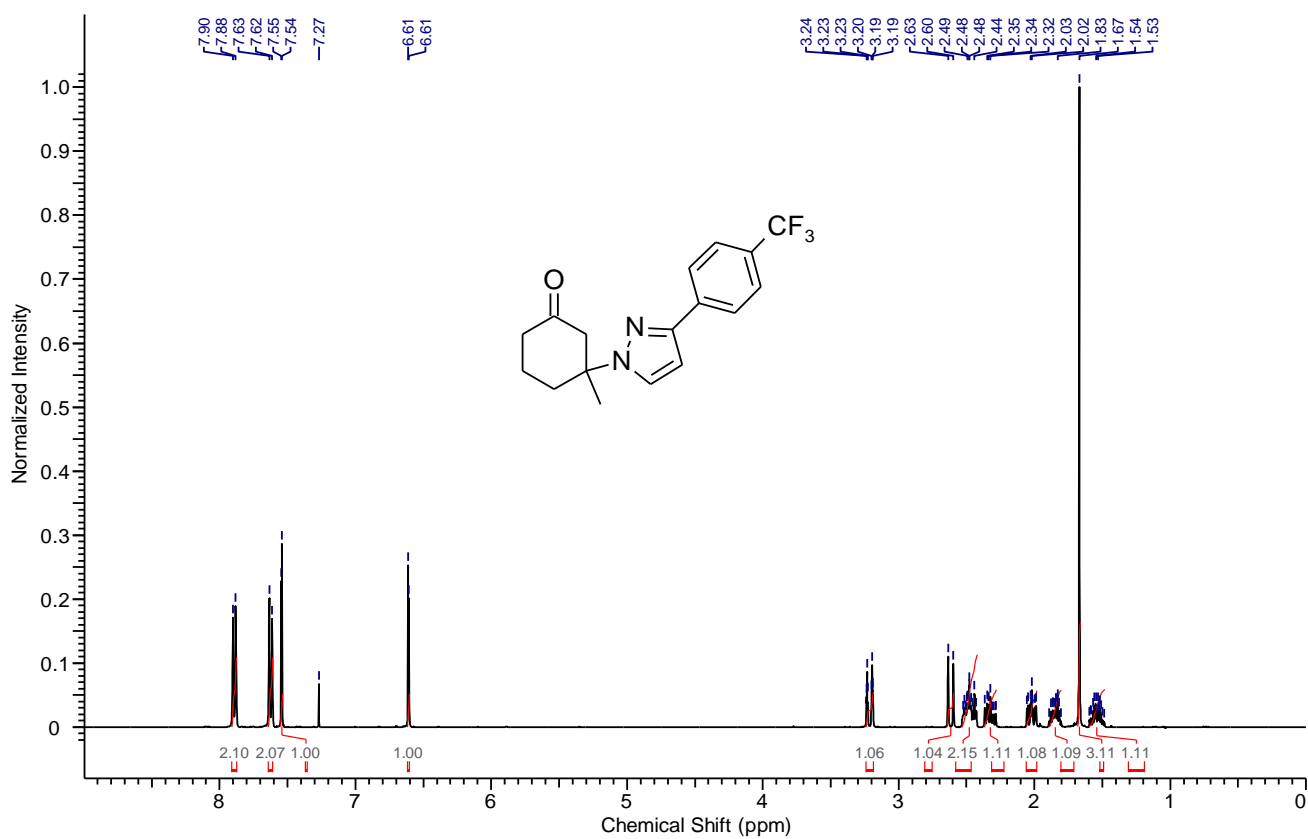

Figure S25. <sup>1</sup>H NMR spectrum of the compound **3an** in CDCl<sub>3</sub>, 400 MHz

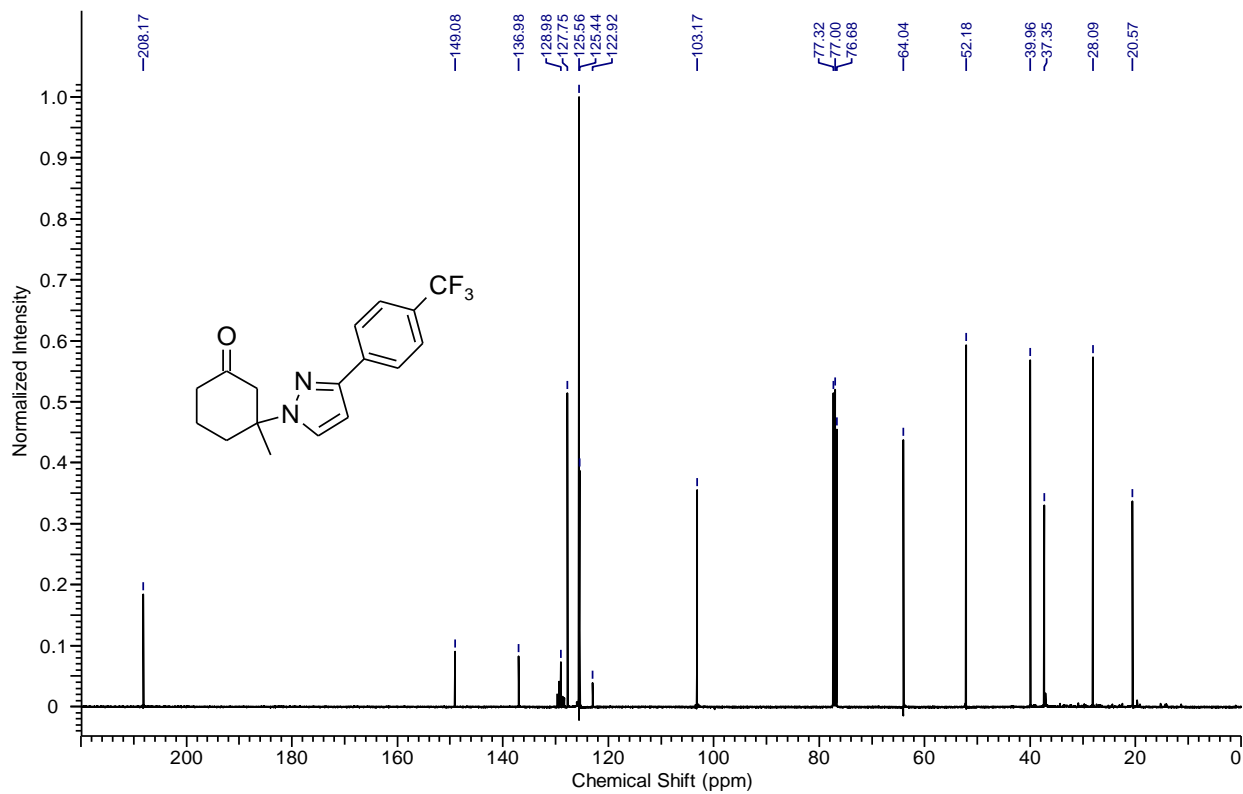

Figure S26. <sup>13</sup>C NMR spectrum of the compound **3an** in CDCl<sub>3</sub>, 100 MHz

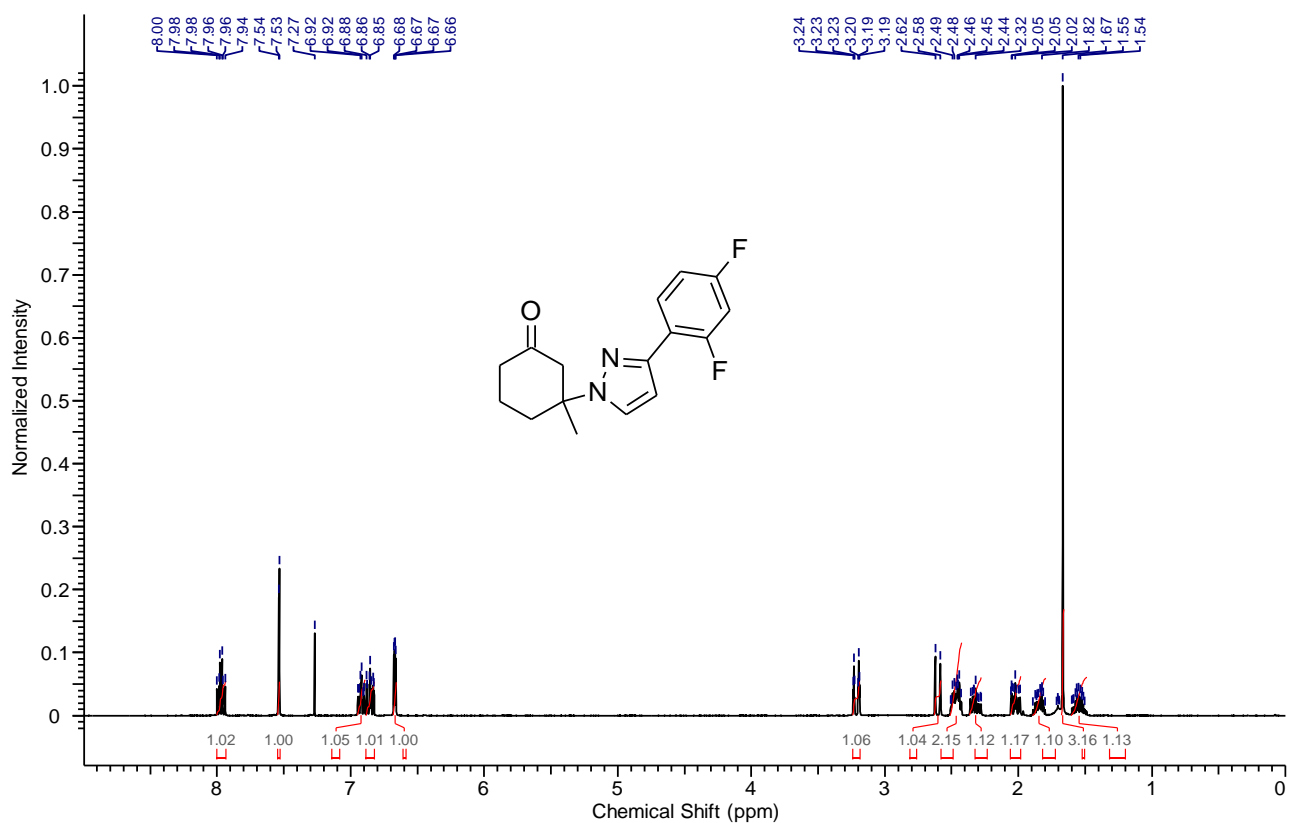

Figure S27. <sup>1</sup>H NMR spectrum of the compound **3ao** in CDCl<sub>3</sub>, 400 MHz

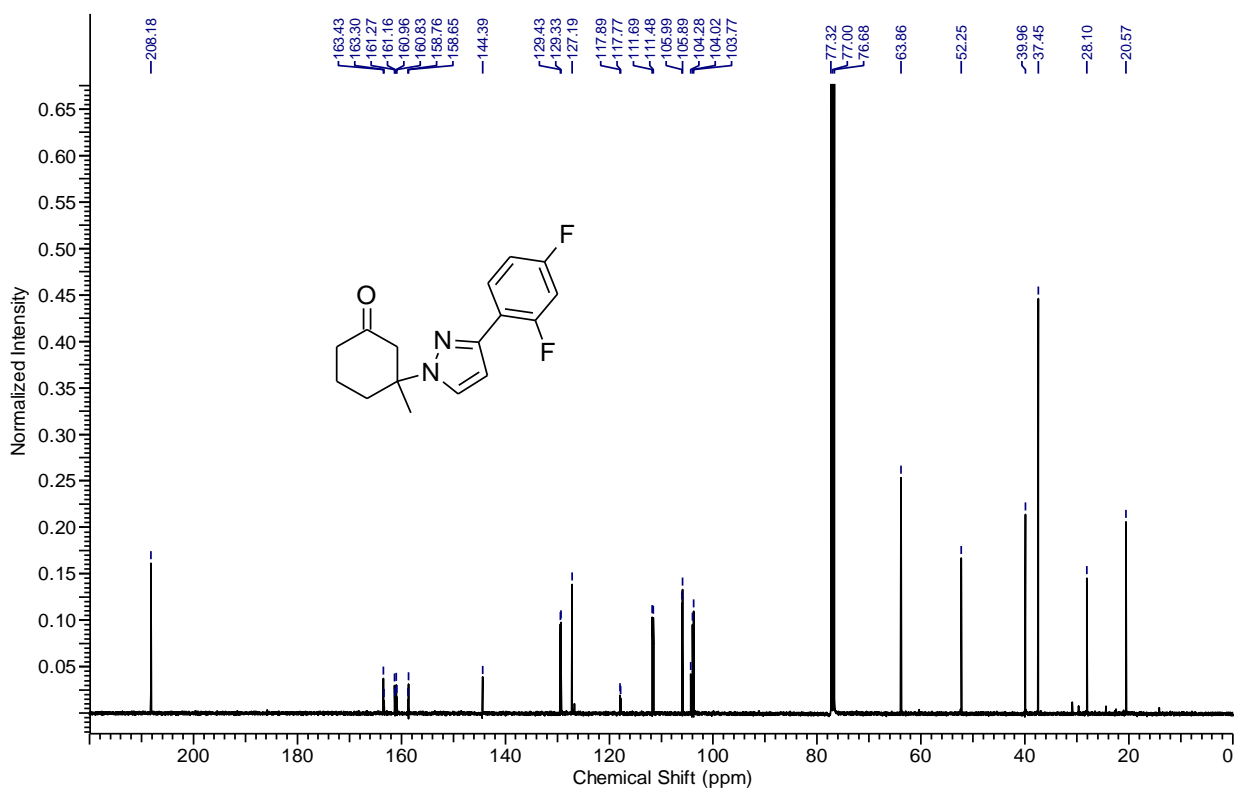

Figure S28. <sup>13</sup>C NMR spectrum of the compound **3ao** in CDCl<sub>3</sub>, 100 MHz

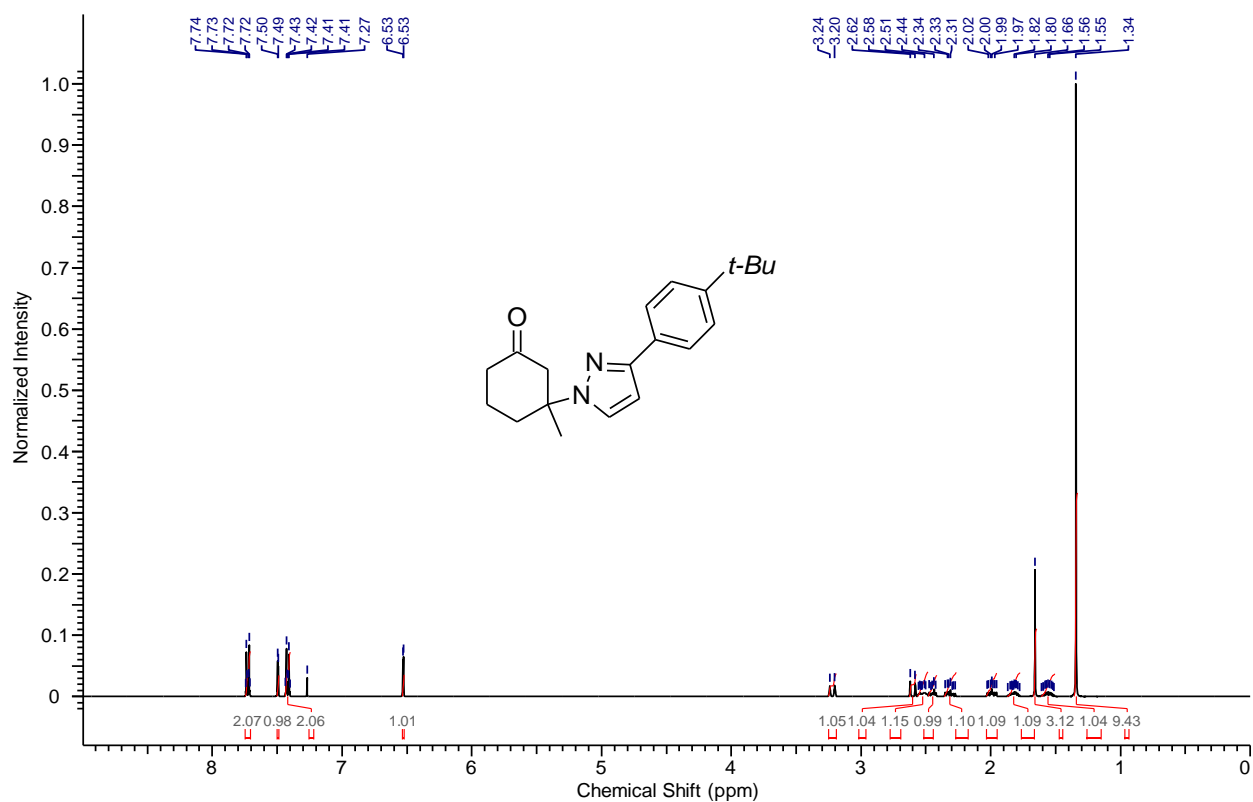

**Figure S29.** <sup>1</sup>H NMR spectrum of the compound **3ap** in CDCl<sub>3</sub>, 400 MHz

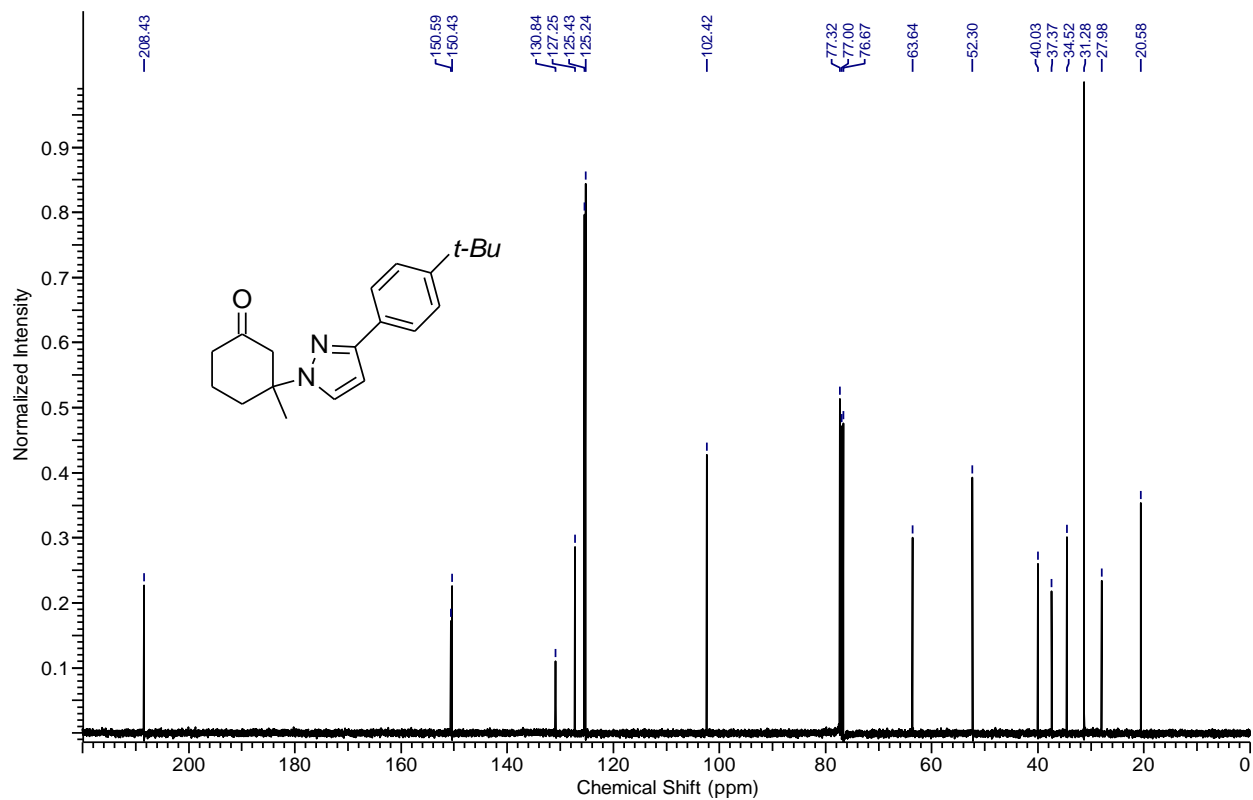

**Figure S30.** <sup>13</sup>C NMR spectrum of the compound **3ap** in CDCl<sub>3</sub>, 100 MHz



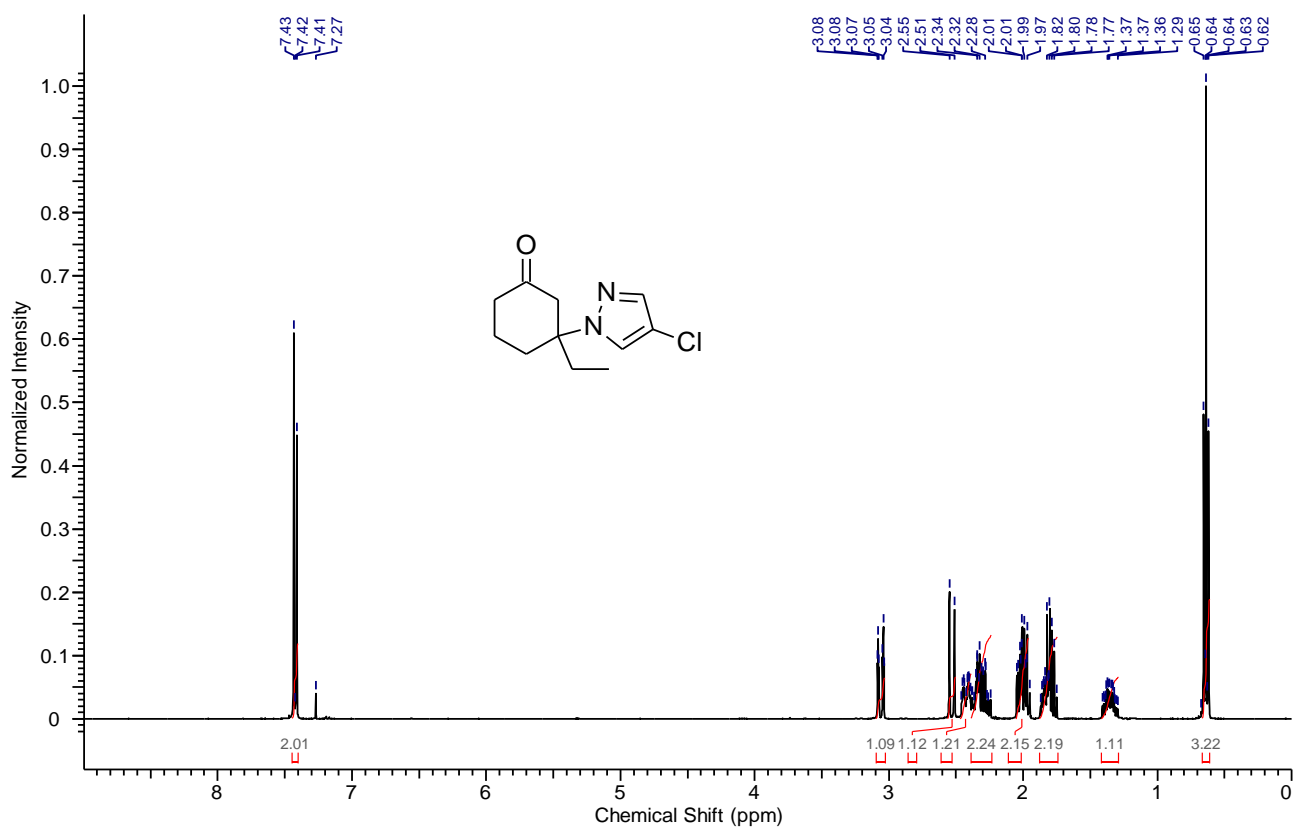

Figure S31. <sup>1</sup>H NMR spectrum of the compound **3bc** in CDCl<sub>3</sub>, 400 MHz

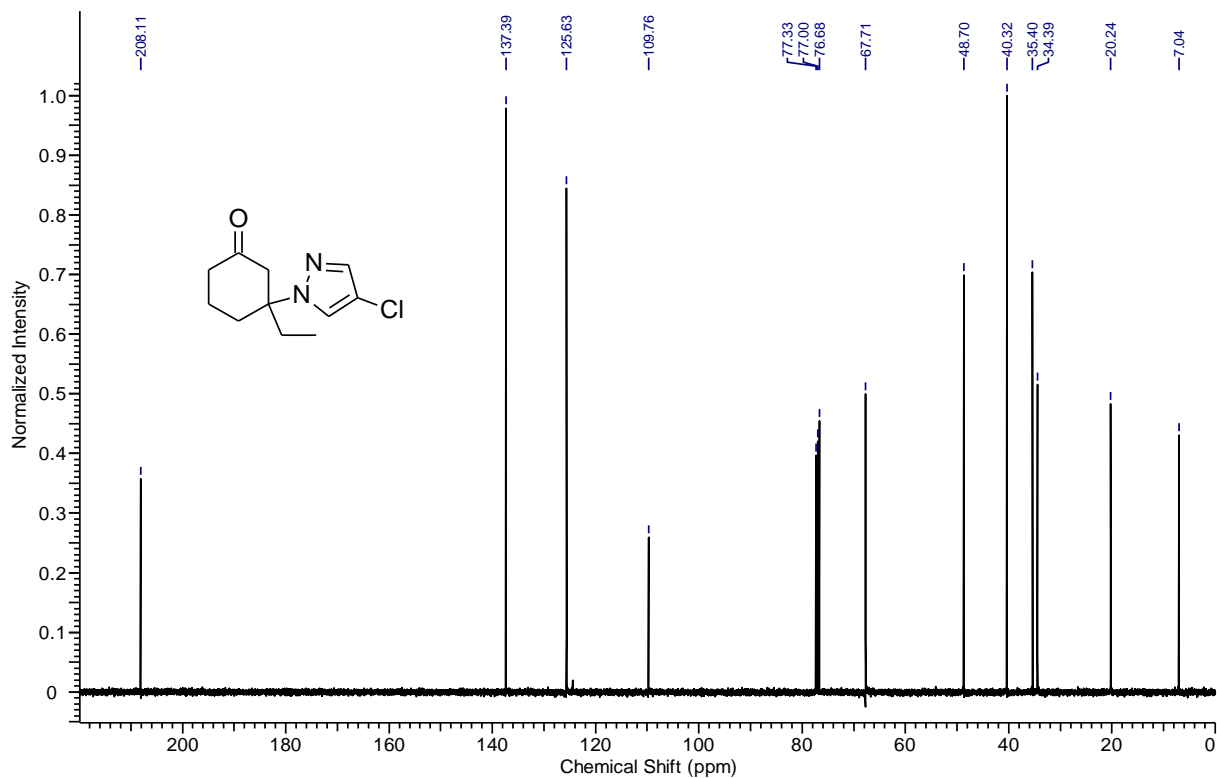

Figure S32. <sup>13</sup>C NMR spectrum of the compound **3bc** in CDCl<sub>3</sub>, 100 MHz

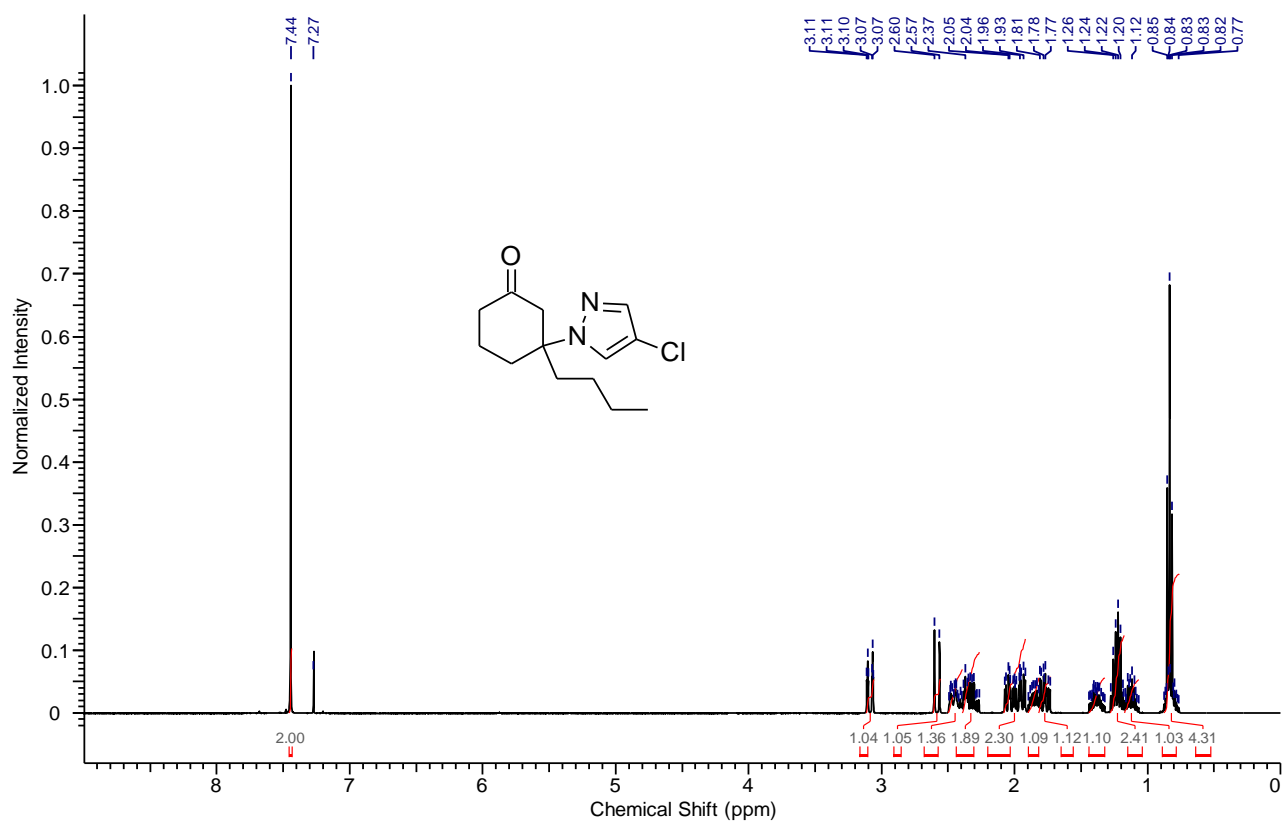

Figure S33.  $^1\text{H}$  NMR spectrum of the compound **3cc** in  $\text{CDCl}_3$ , 400 MHz

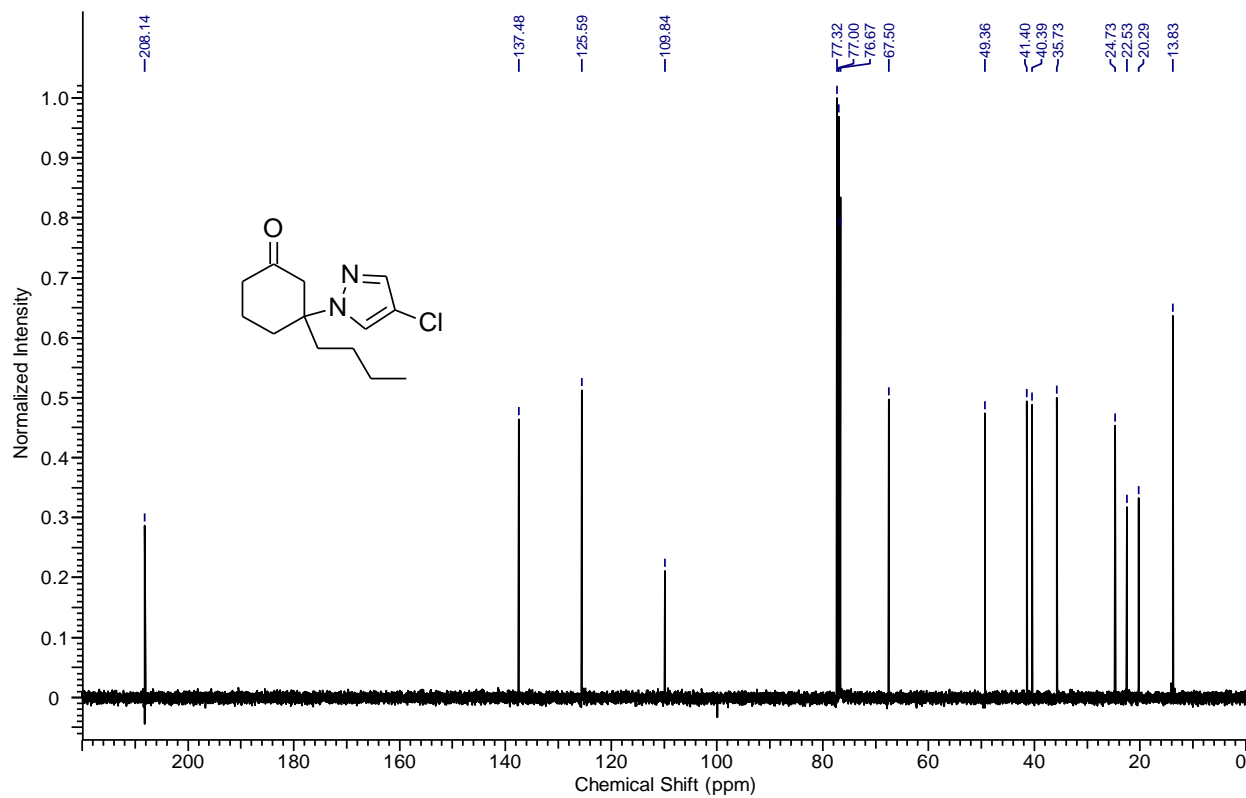

Figure S34.  $^{13}\text{C}$  NMR spectrum of the compound **3cc** in  $\text{CDCl}_3$ , 100 MHz

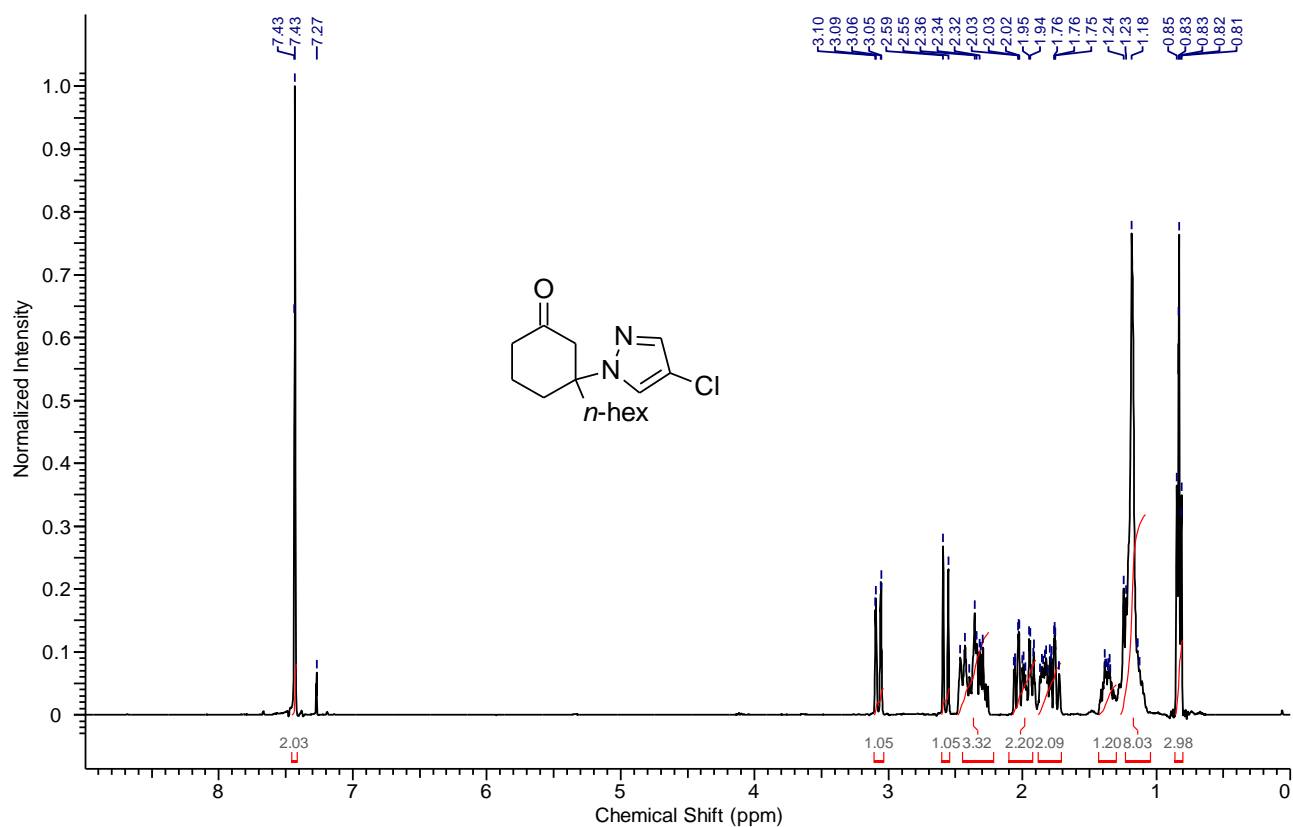

**Figure S35.** <sup>1</sup>H NMR spectrum of the compound **3dc** in CDCl<sub>3</sub>, 400 MHz

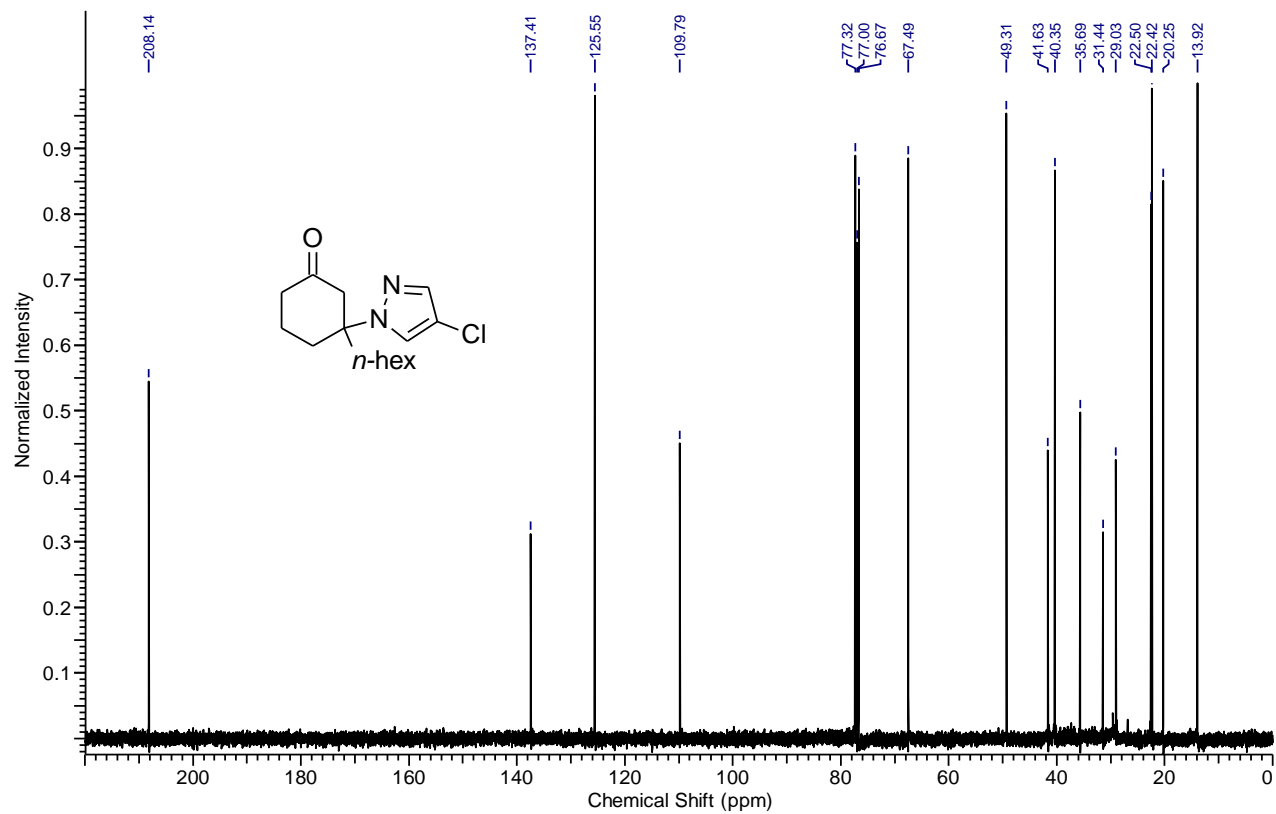

**Figure S36.** <sup>13</sup>C NMR spectrum of the compound **3dc** in CDCl<sub>3</sub>, 100 MHz

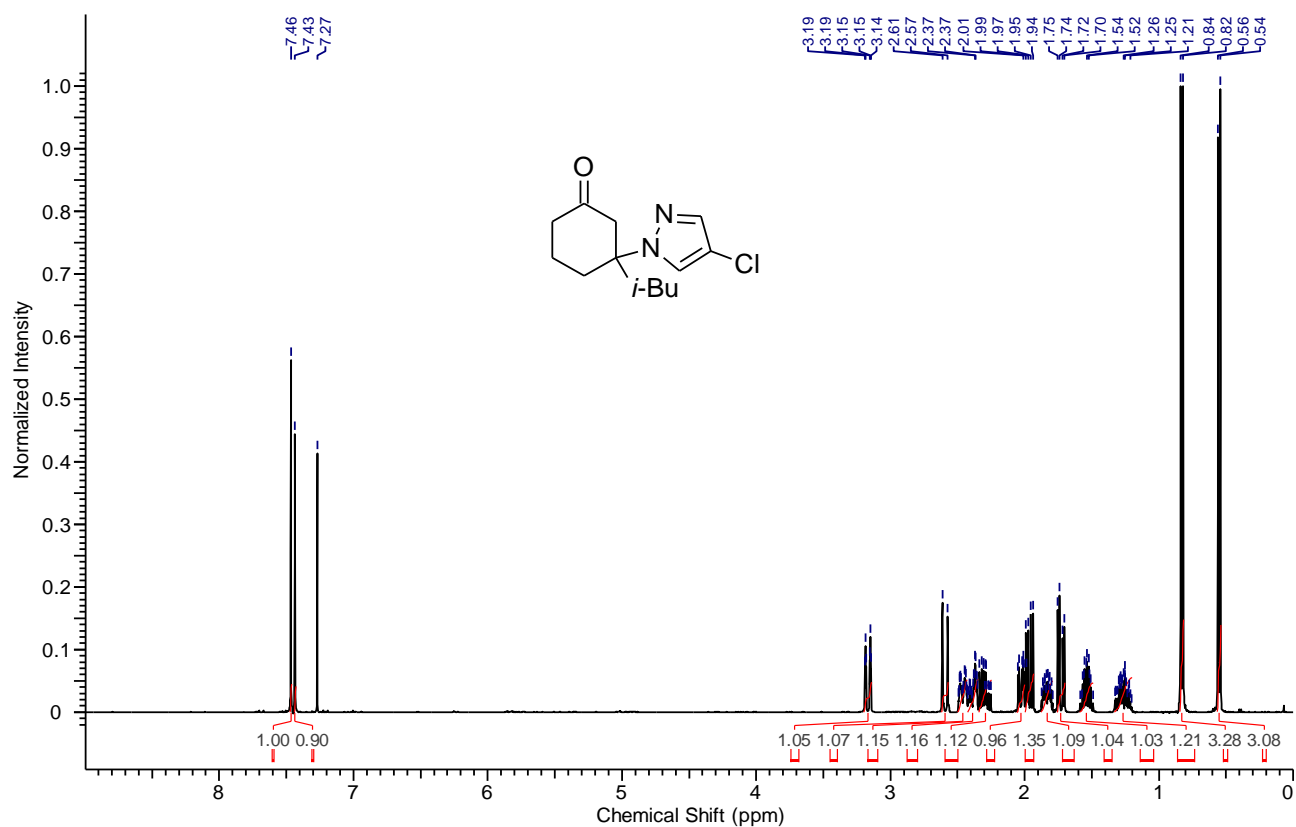

Figure S37.  $^1\text{H}$  NMR spectrum of the compound **3ec** in  $\text{CDCl}_3$ , 400 MHz

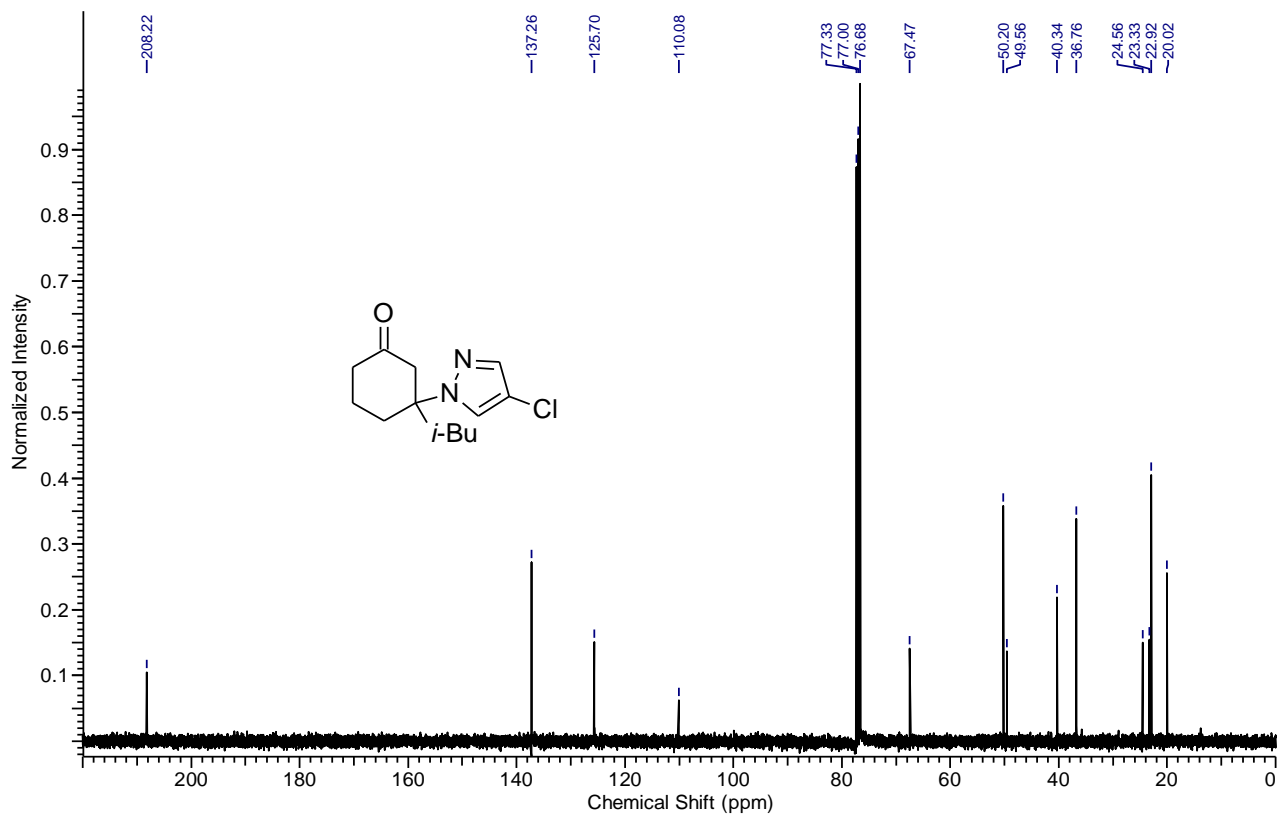

Figure S38.  $^{13}\text{C}$  NMR spectrum of the compound **3ec** in  $\text{CDCl}_3$ , 100 MHz

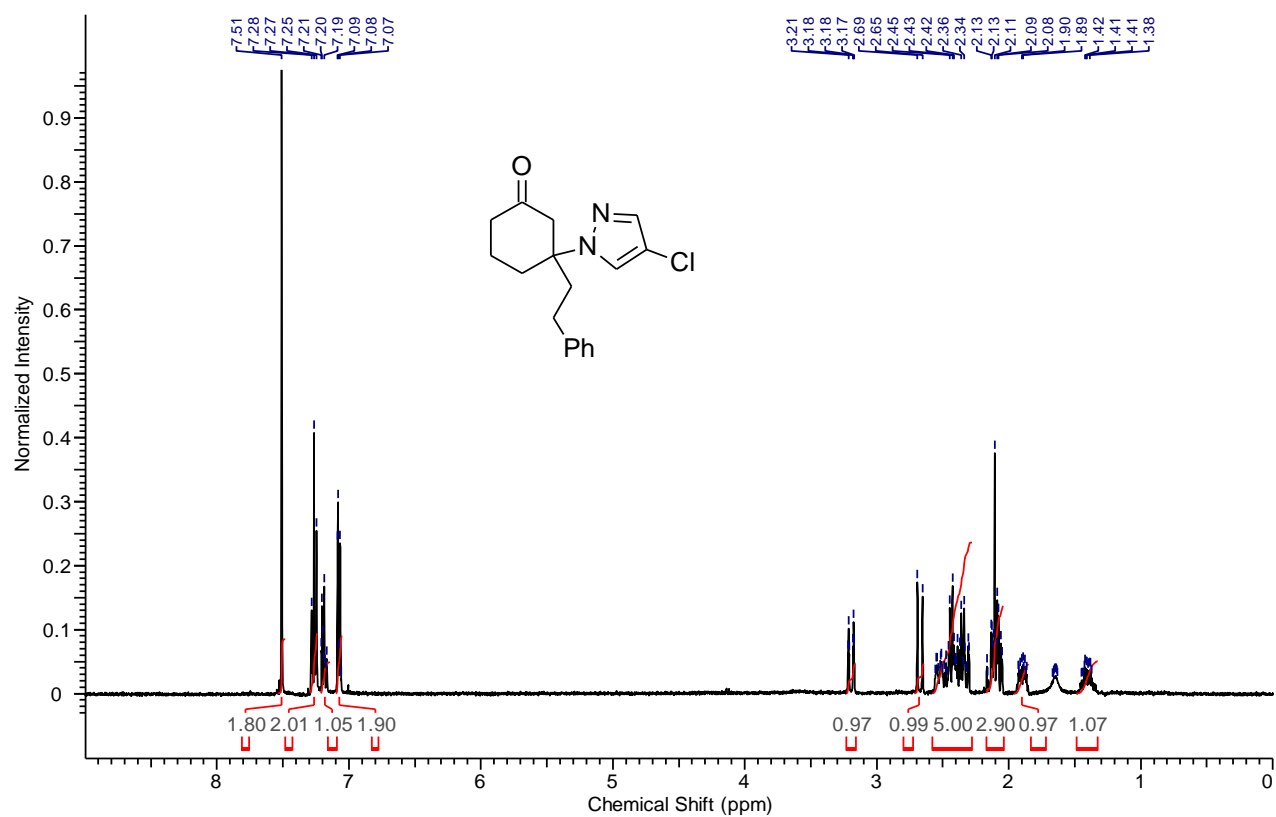

**Figure S39.** <sup>1</sup>H NMR spectrum of the compound **3fc** in CDCl<sub>3</sub>, 400 MHz

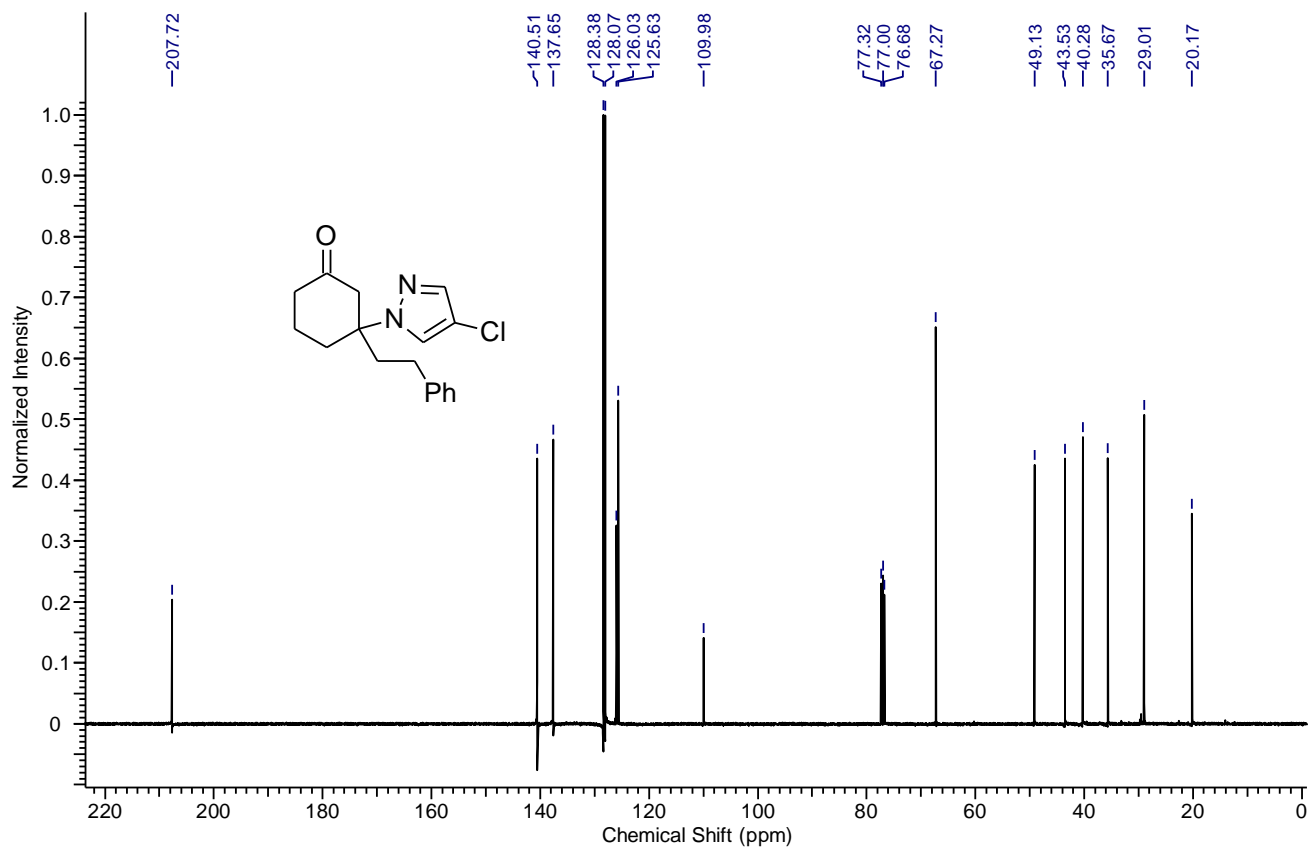

**Figure S40.** <sup>13</sup>C NMR spectrum of the compound **3fc** in CDCl<sub>3</sub>, 100 MHz

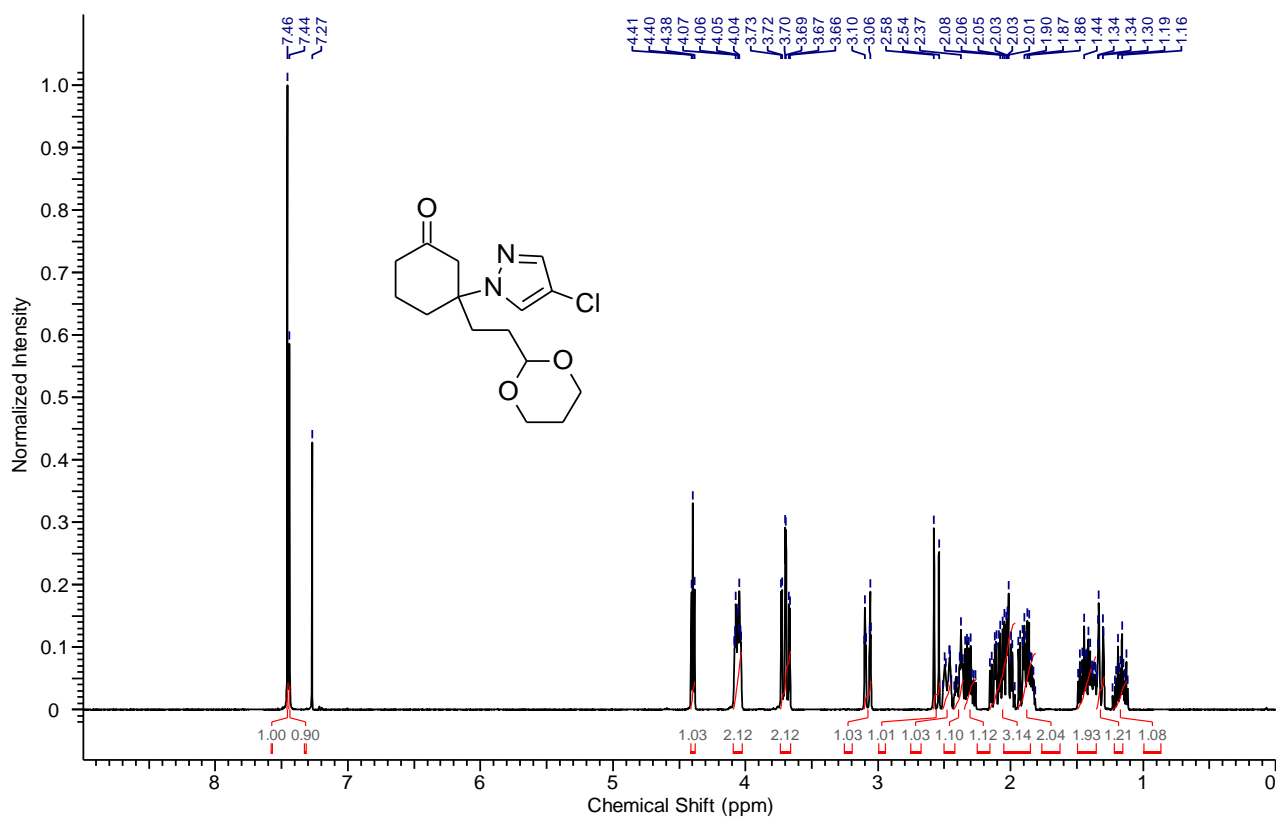

Figure S41.  $^1\text{H}$  NMR spectrum of the compound **3gc** in  $\text{CDCl}_3$ , 400 MHz

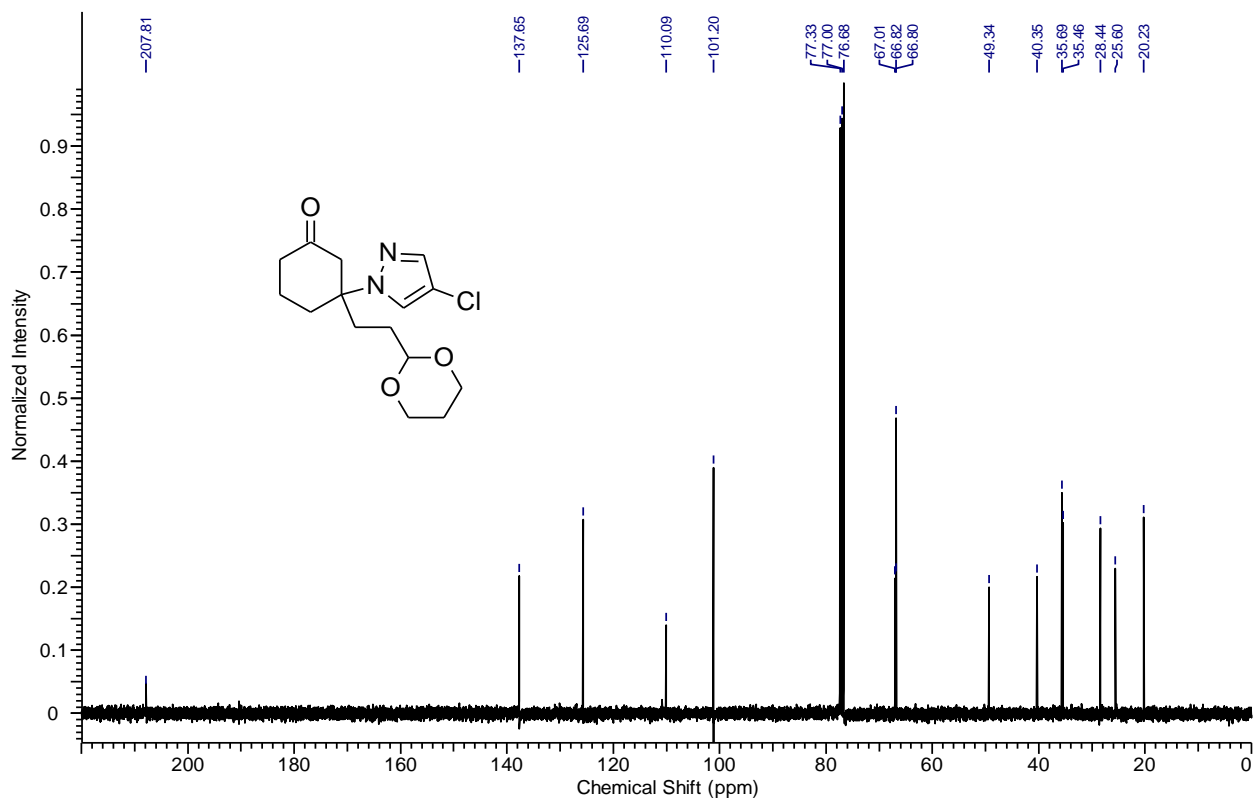

Figure S42.  $^{13}\text{C}$  NMR spectrum of the compound **3gc** in  $\text{CDCl}_3$ , 100 MHz

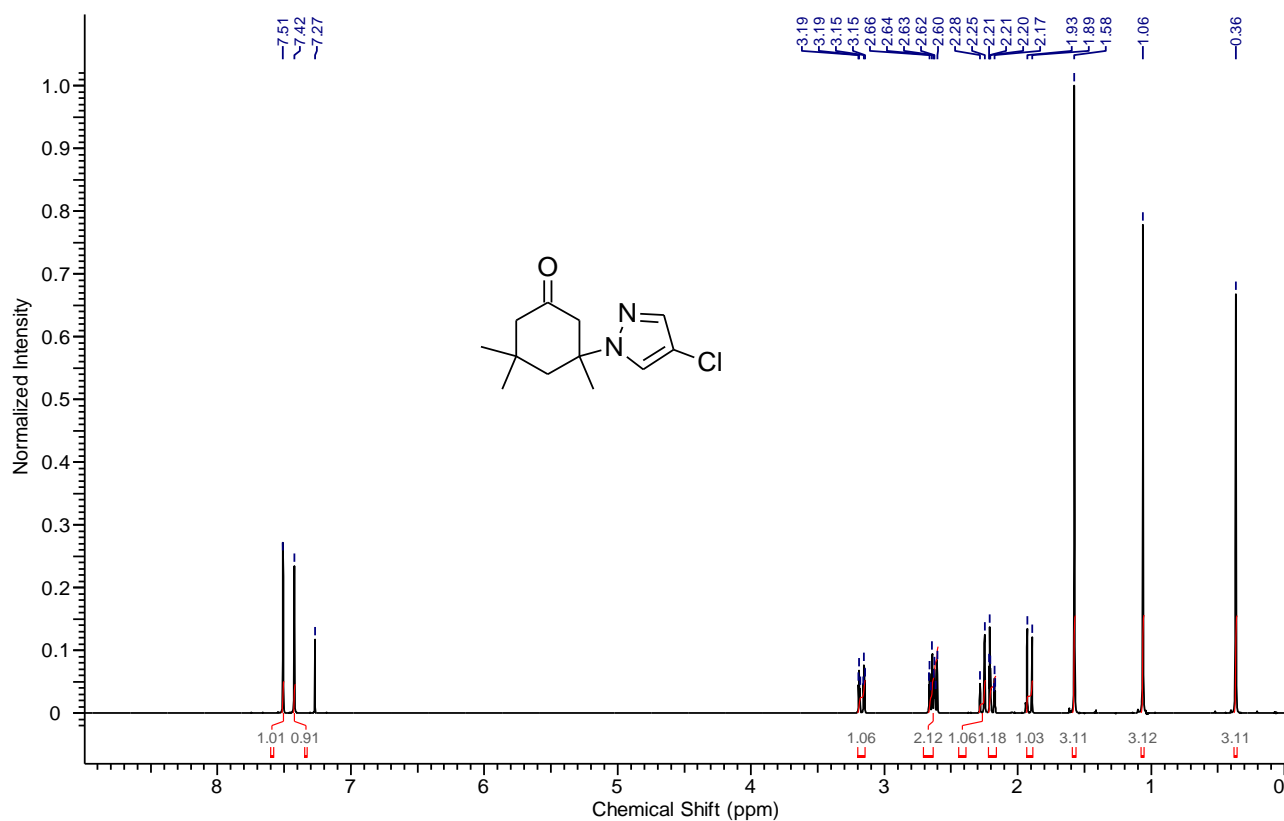

**Figure S43.**  $^1\text{H}$  NMR spectrum of the compound **3hc** in  $\text{CDCl}_3$ , 400 MHz

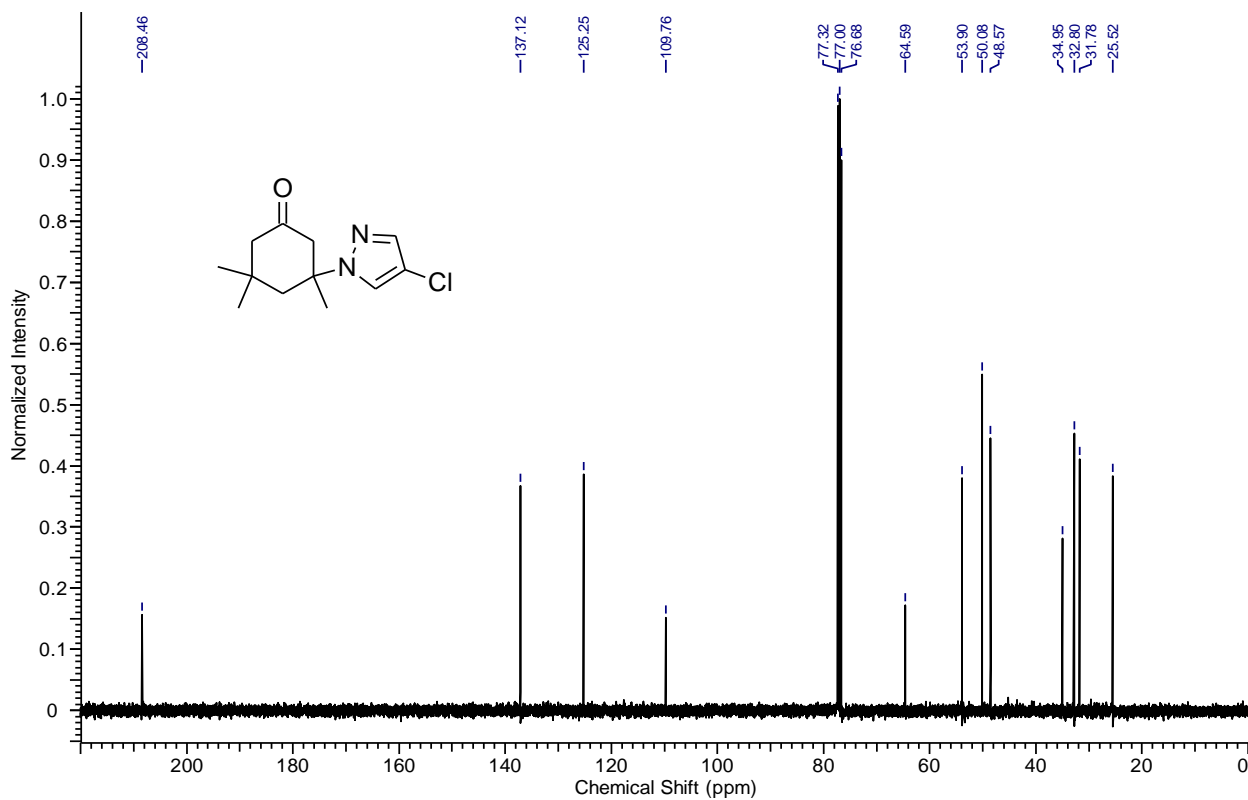

**Figure S44.**  $^{13}\text{C}$  NMR spectrum of the compound **3hc** in  $\text{CDCl}_3$ , 100 MHz

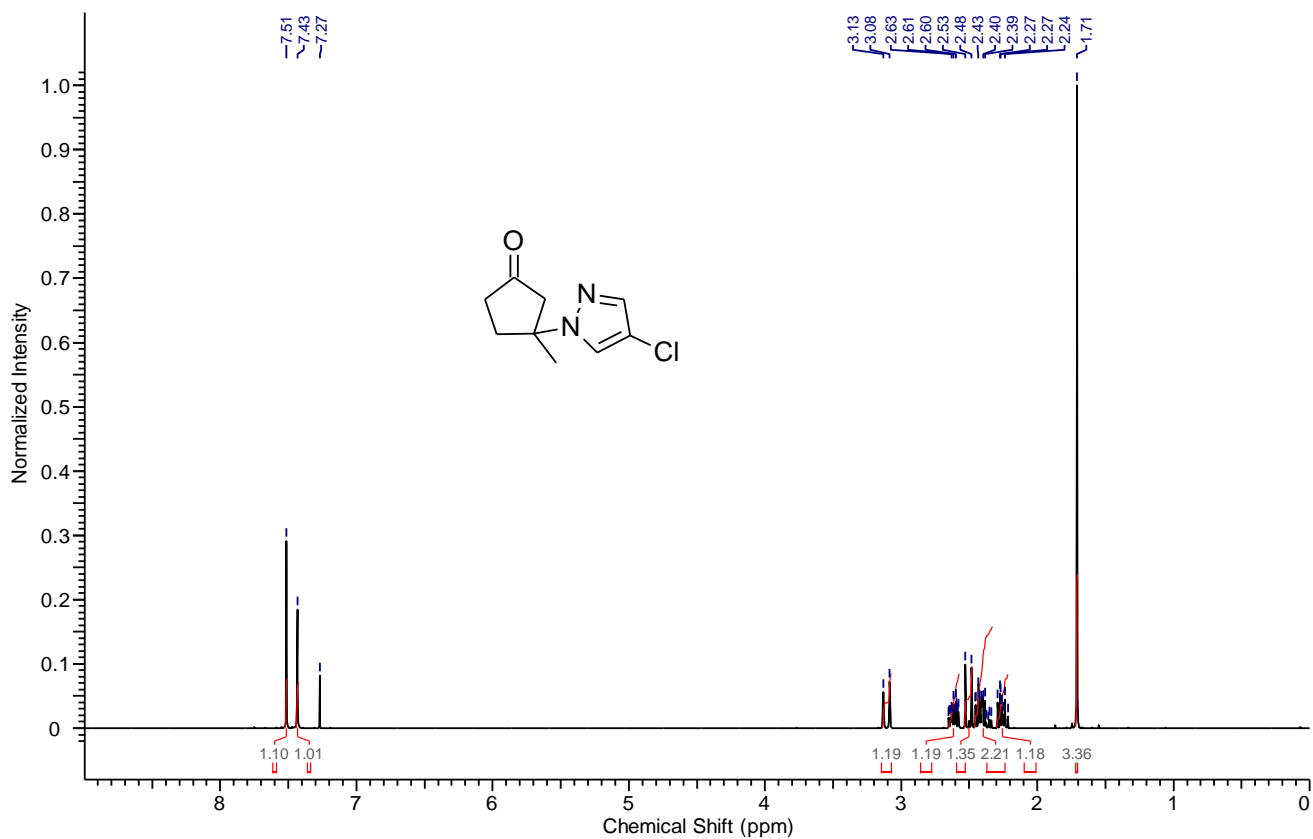

**Figure S45.**  $^1\text{H}$  NMR spectrum of the compound **3ic** in  $\text{CDCl}_3$ , 400 MHz

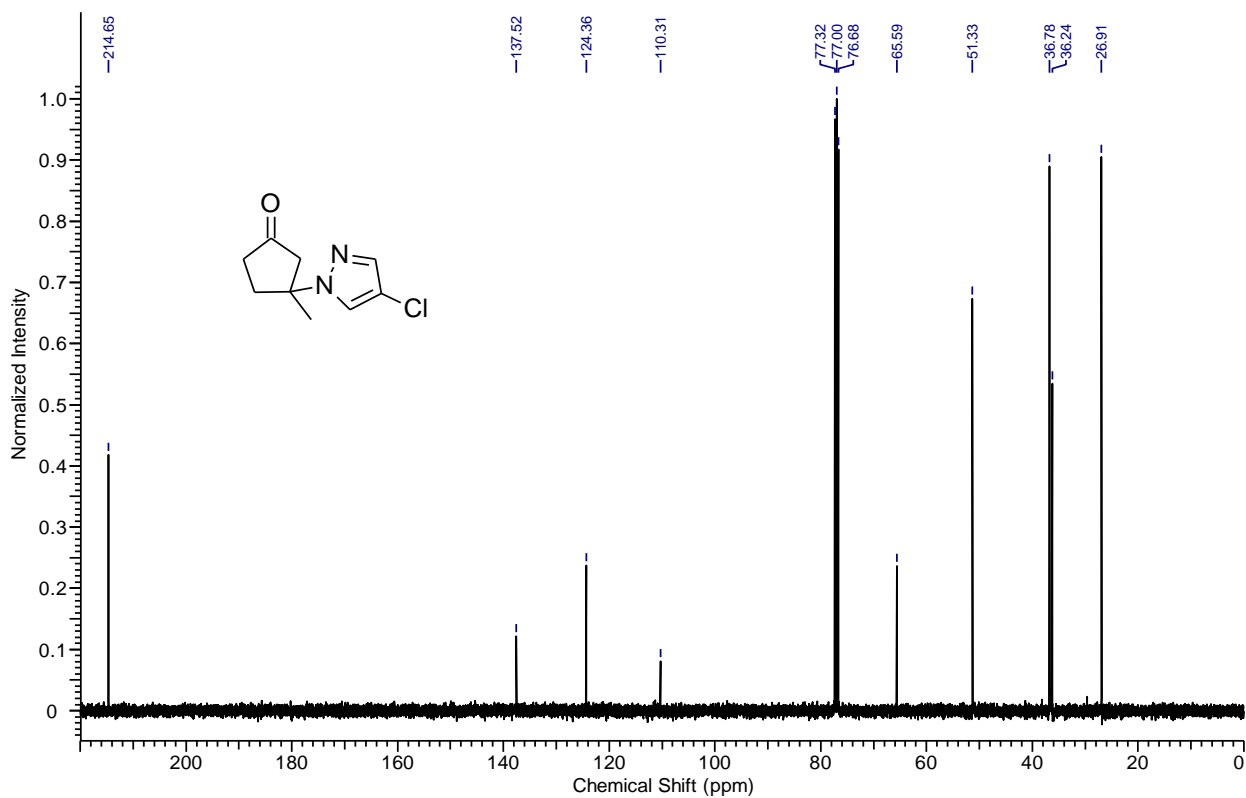

**Figure S46.**  $^{13}\text{C}$  NMR spectrum of the compound **3ic** in  $\text{CDCl}_3$ , 100 MHz



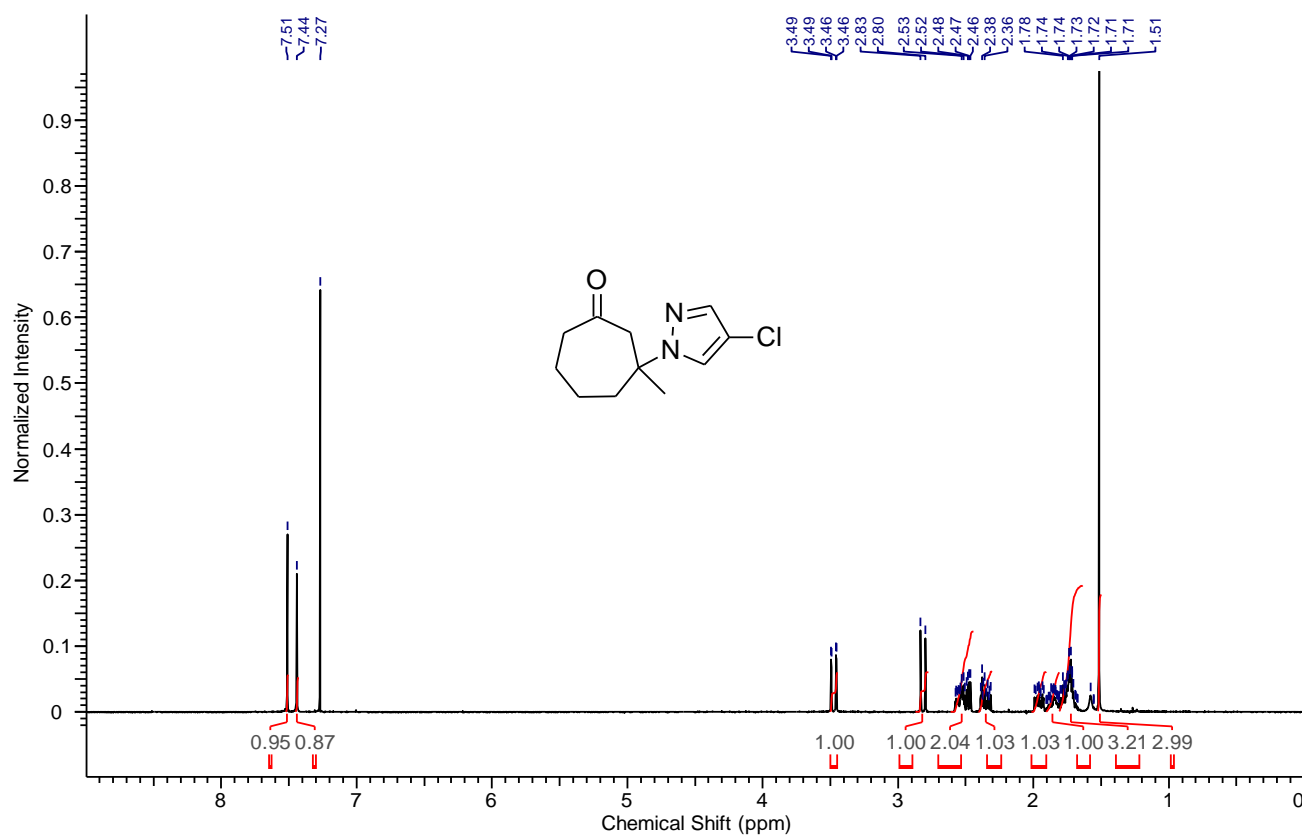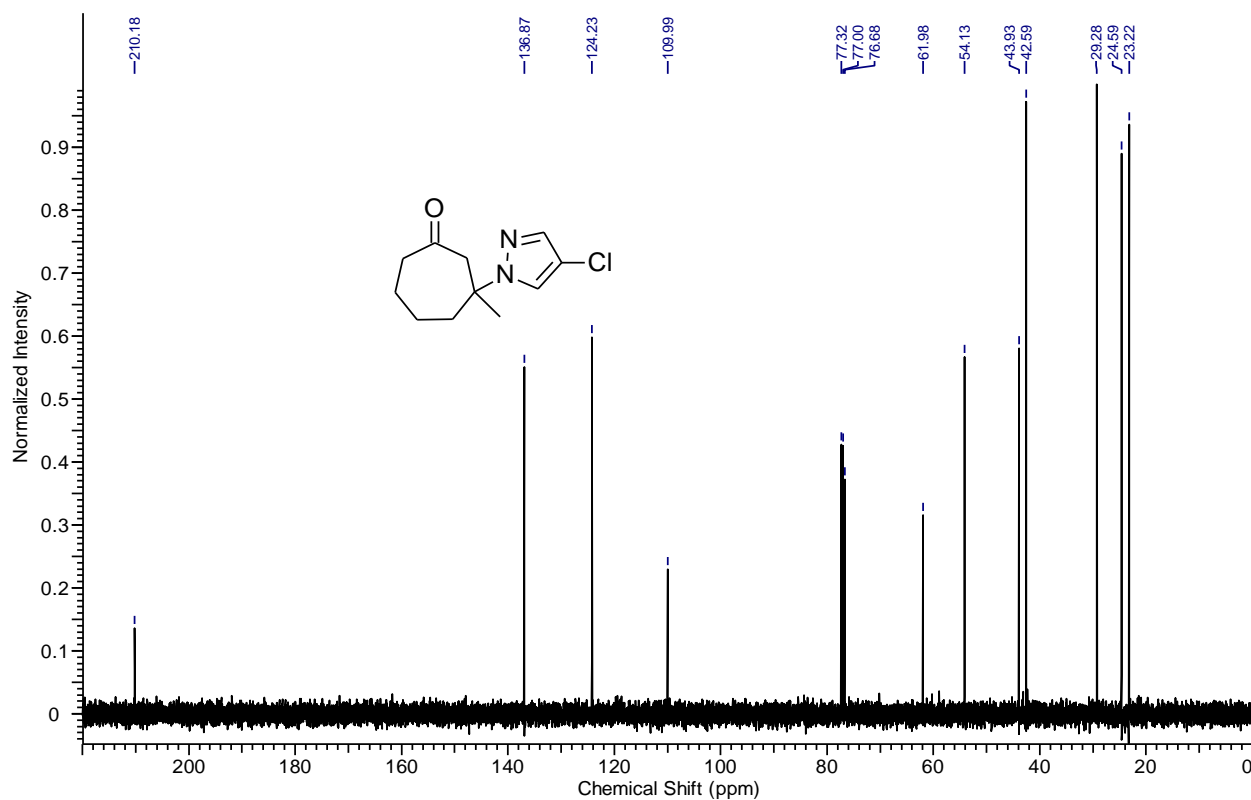

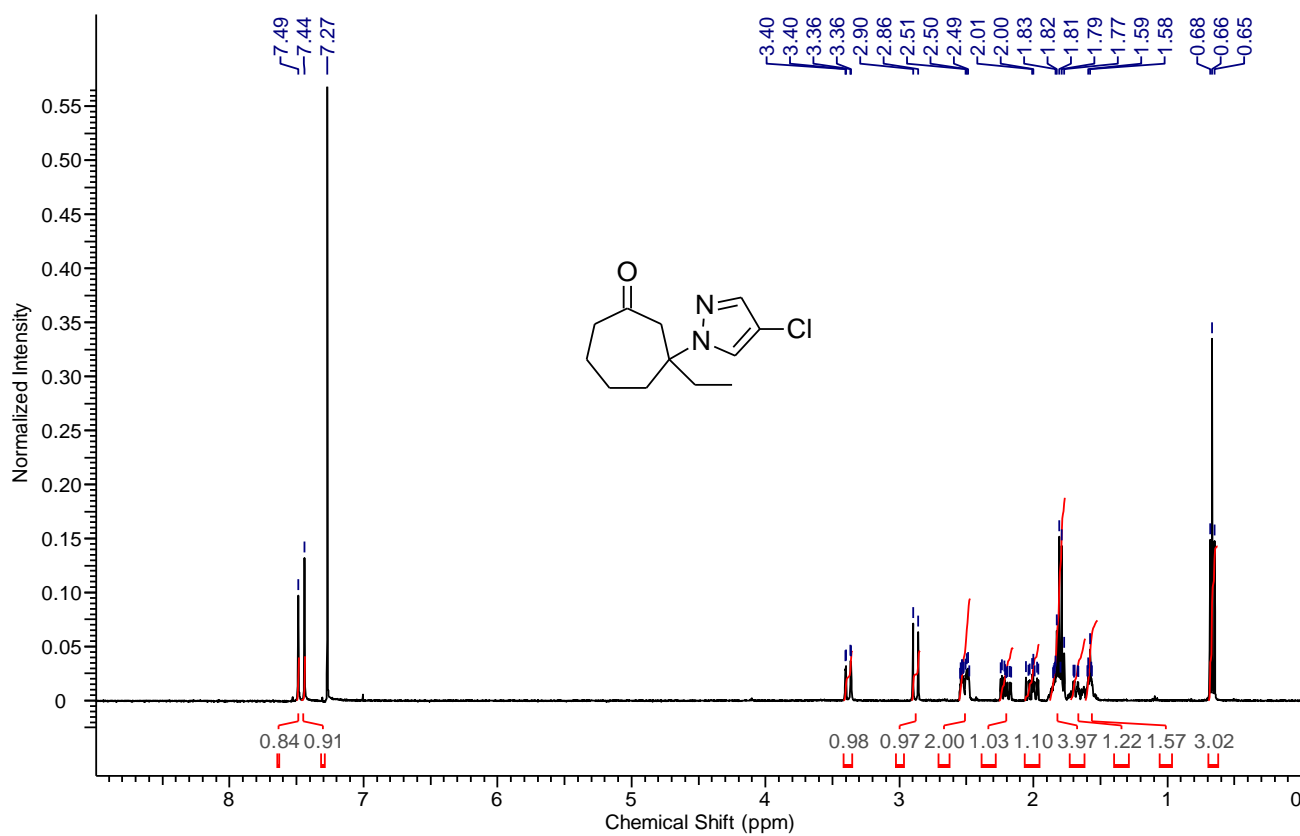

**Figure S49.** <sup>1</sup>H NMR spectrum of the compound **3kc** in CDCl<sub>3</sub>, 400 MHz

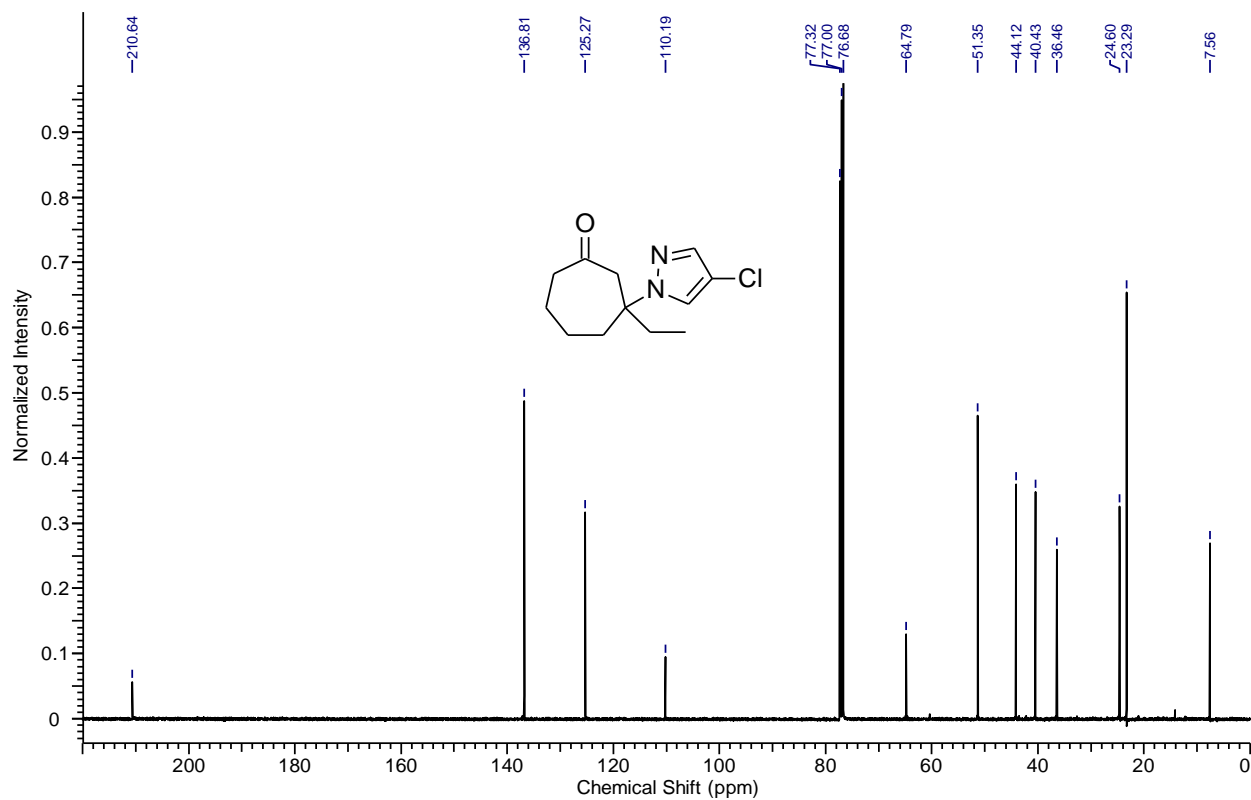

**Figure S50.** <sup>13</sup>C NMR spectrum of the compound **3kc** in CDCl<sub>3</sub>, 100 MHz

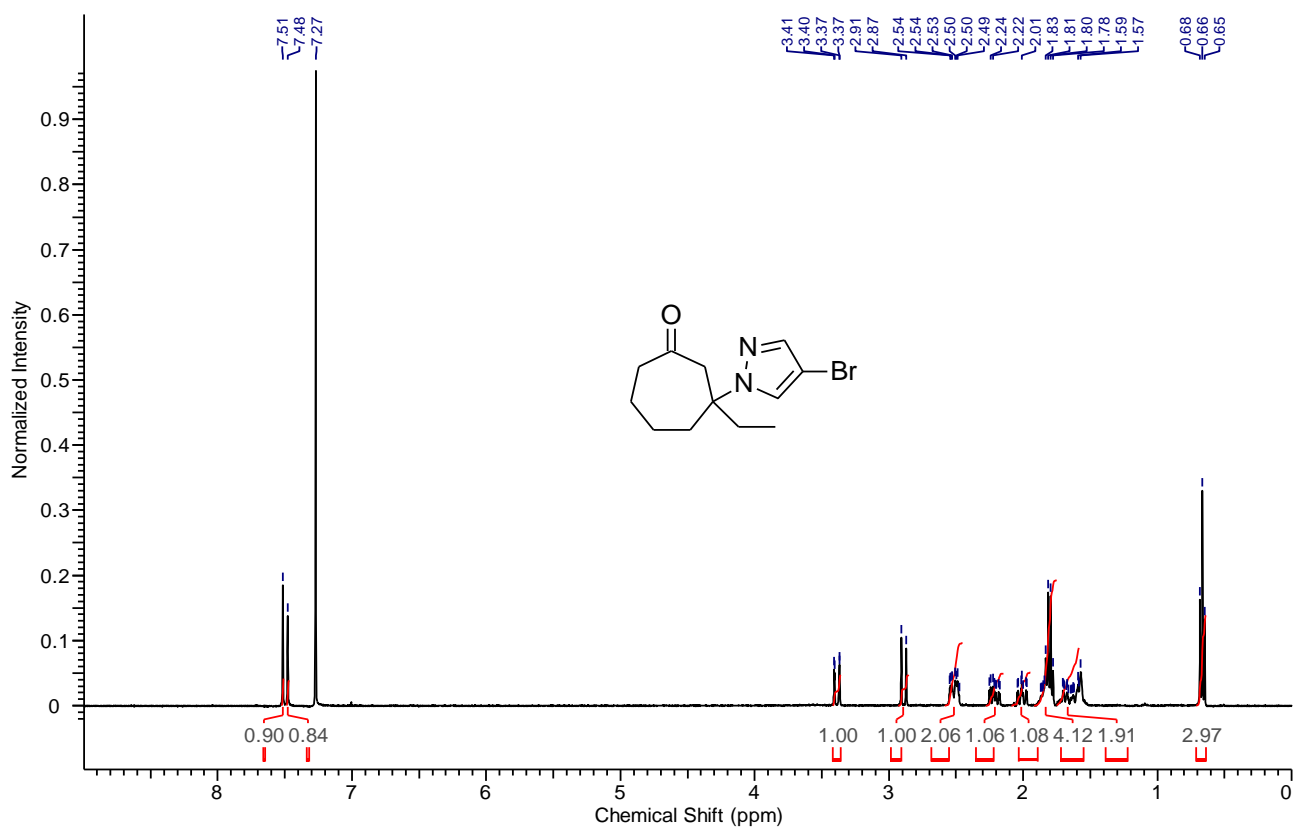

**Figure S51.**  $^1\text{H}$  NMR spectrum of the compound **3kd** in  $\text{CDCl}_3$ , 400 MHz

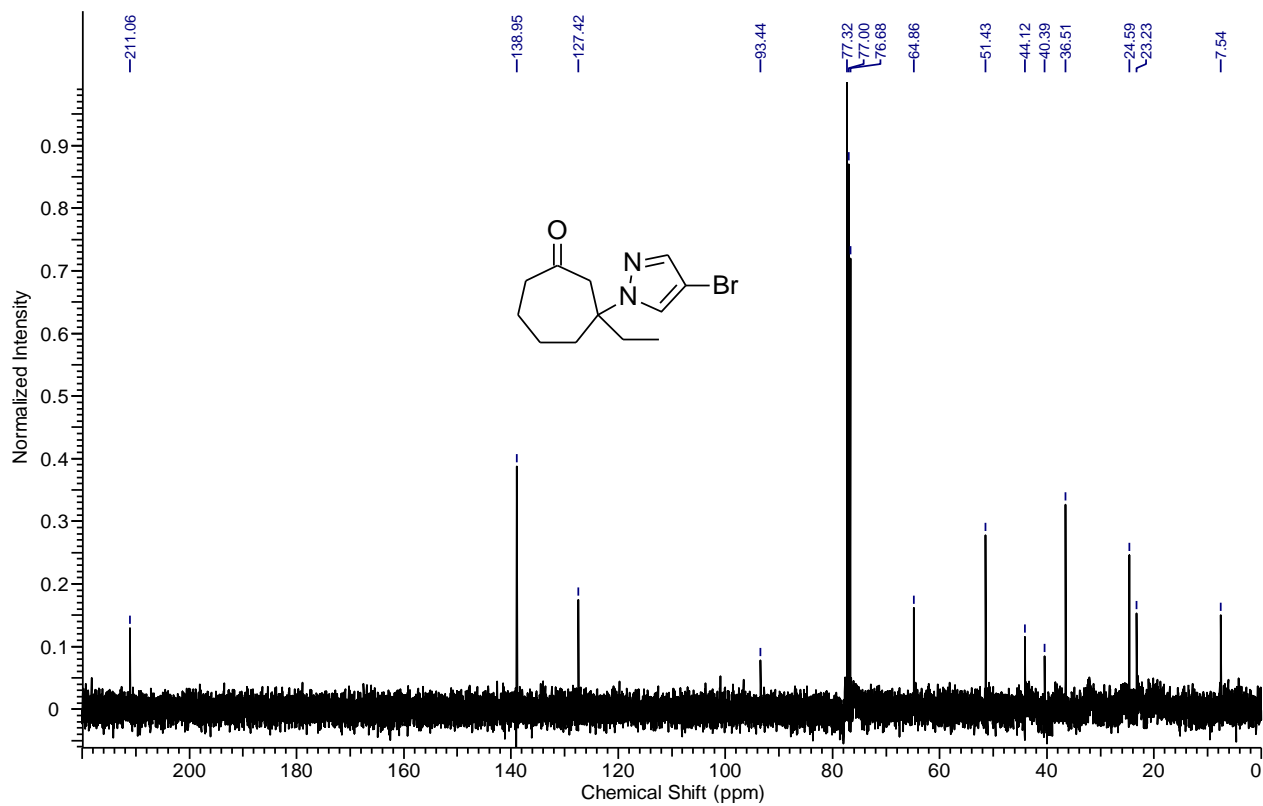

**Figure S52.**  $^{13}\text{C}$  NMR spectrum of the compound **3kd** in  $\text{CDCl}_3$ , 100 MHz

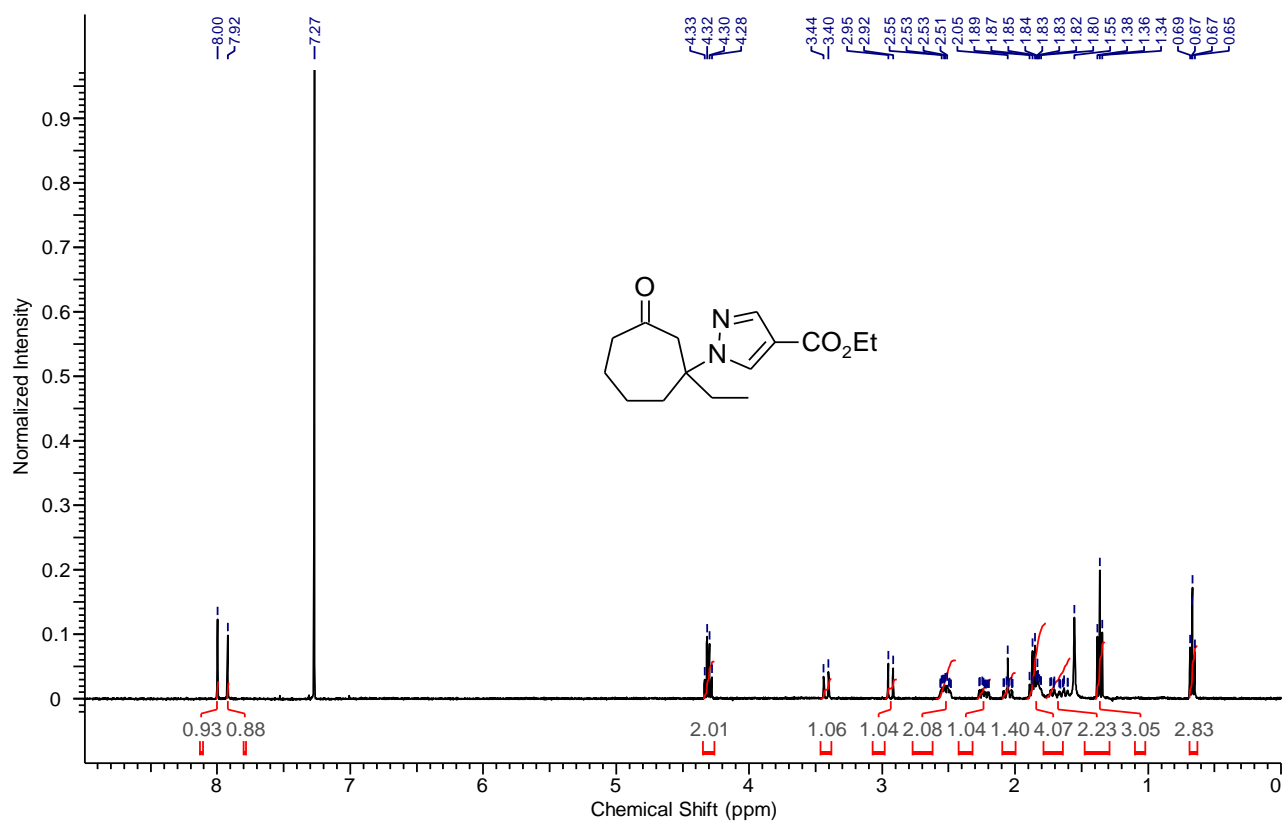

Figure S53.  $^1\text{H}$  NMR spectrum of the compound **3ke** in  $\text{CDCl}_3$ , 400 MHz

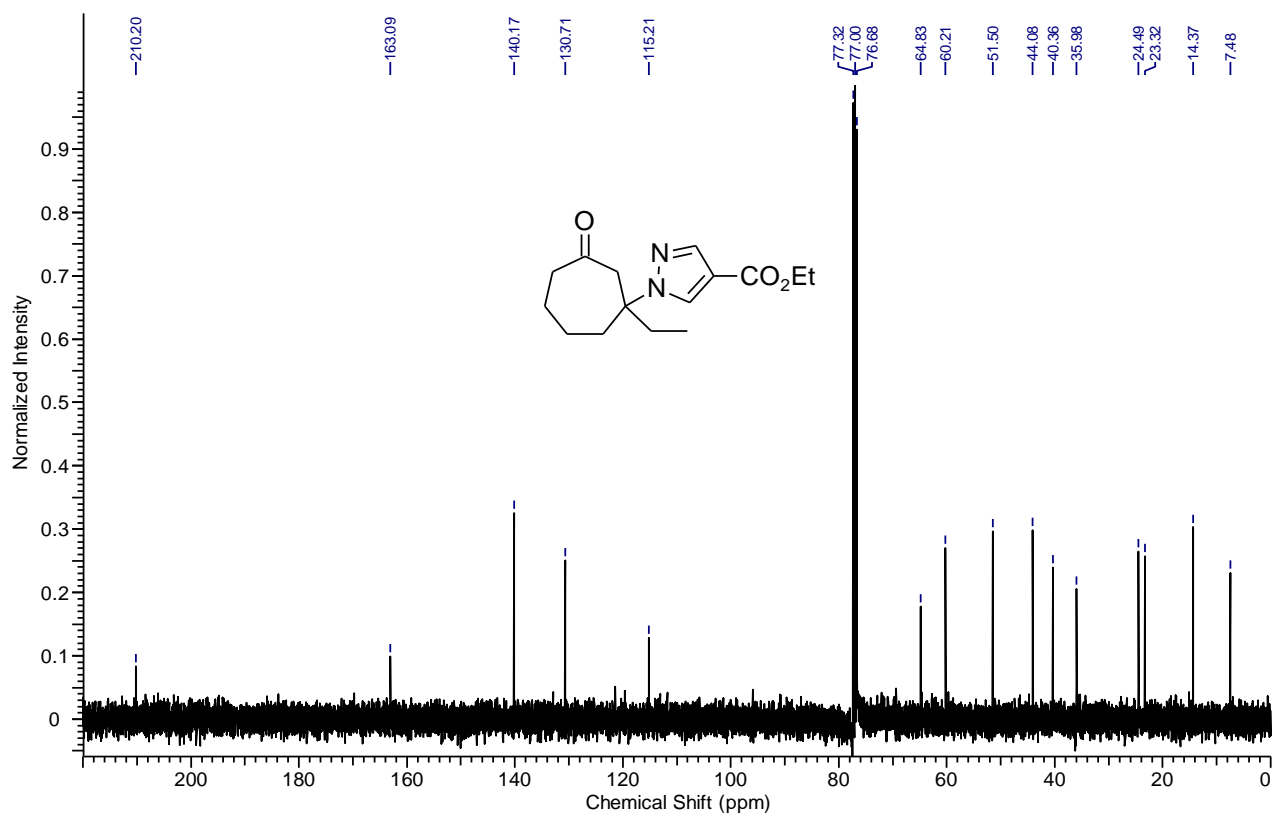

Figure S54.  $^{13}\text{C}$  NMR spectrum of the compound **3ke** in  $\text{CDCl}_3$ , 100 MHz

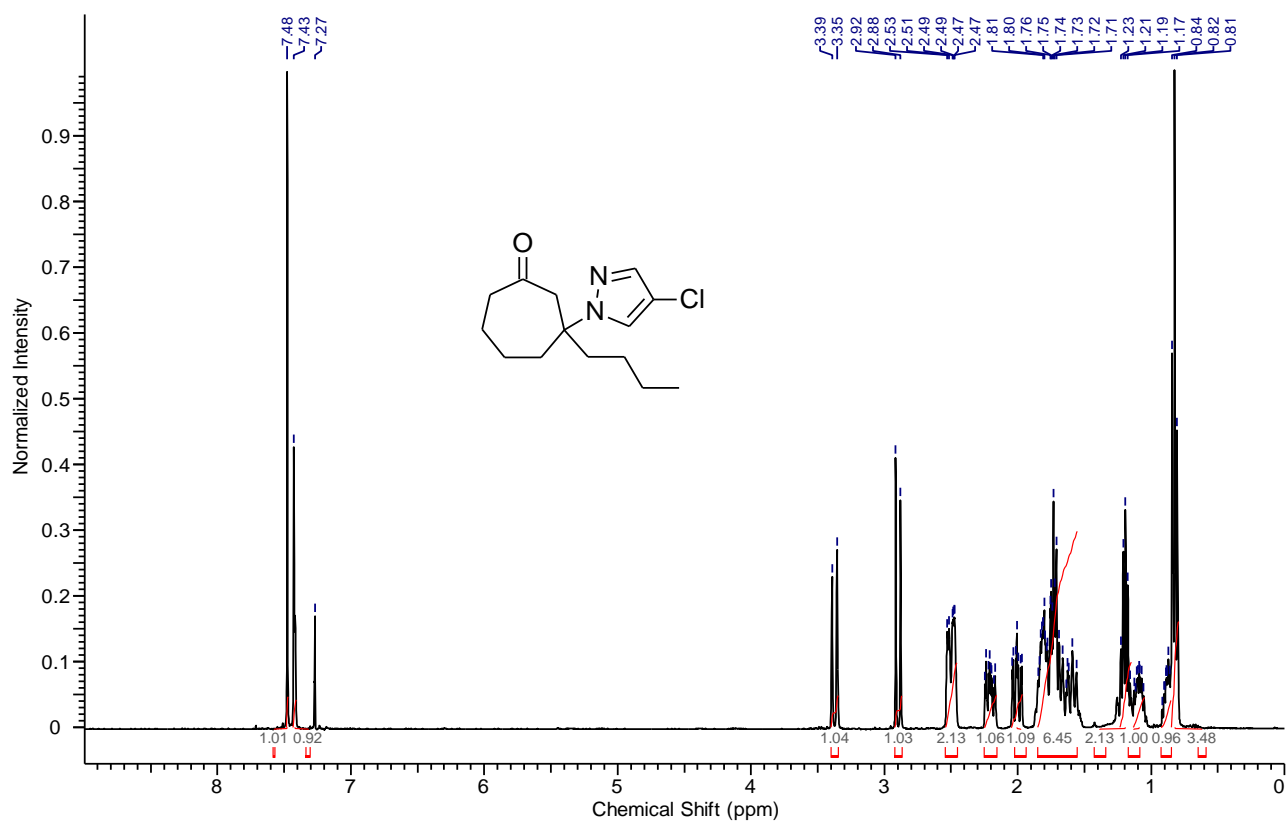

Figure S55.  $^1\text{H}$  NMR spectrum of the compound **3lc** in  $\text{CDCl}_3$ , 400 MHz

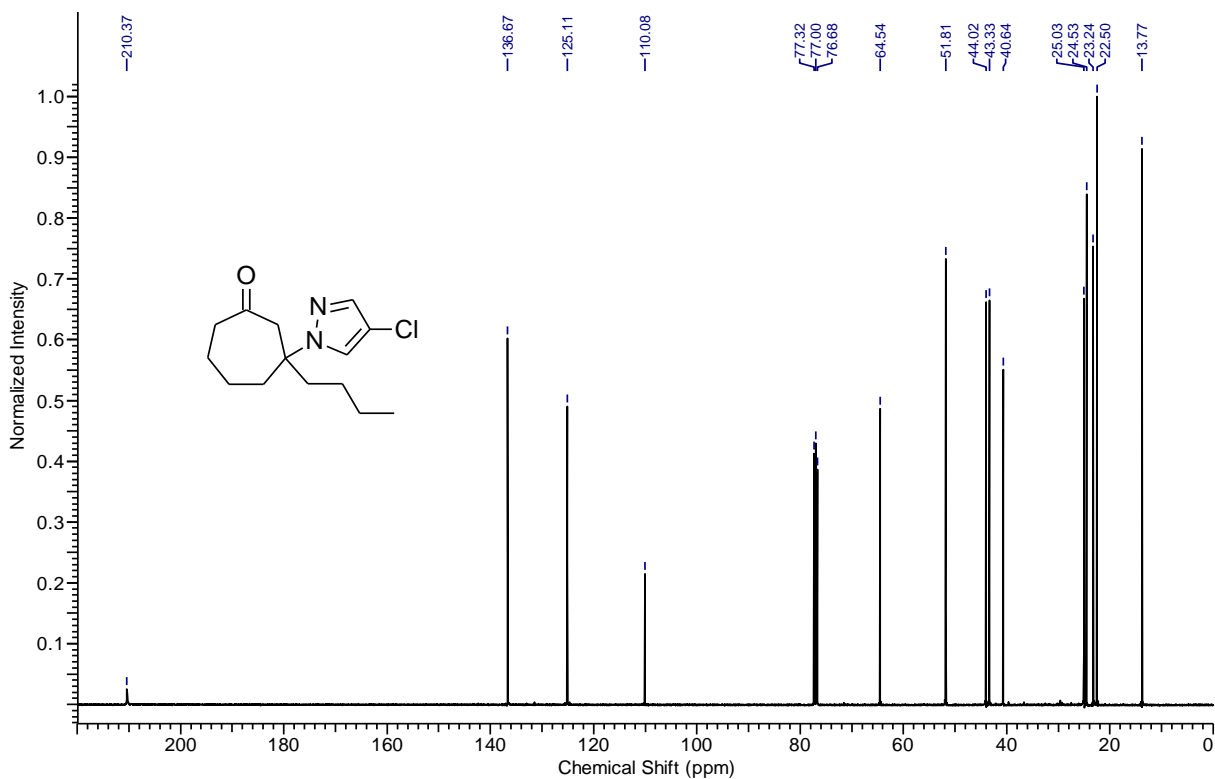

Figure S56.  $^{13}\text{C}$  NMR spectrum of the compound **3lc** in  $\text{CDCl}_3$ , 100 MHz

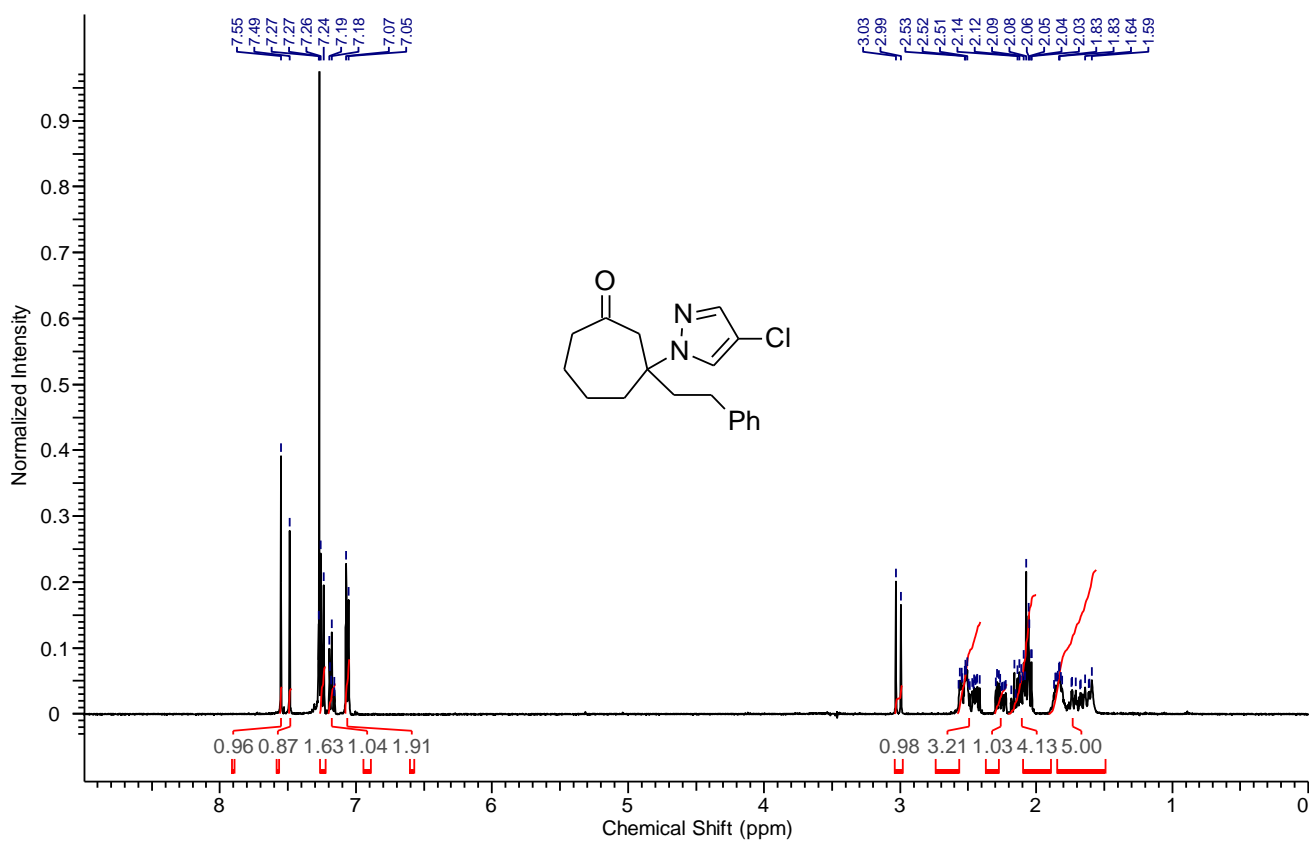

**Figure S57.**  $^1\text{H}$  NMR spectrum of the compound **3mc** in  $\text{CDCl}_3$ , 400 MHz

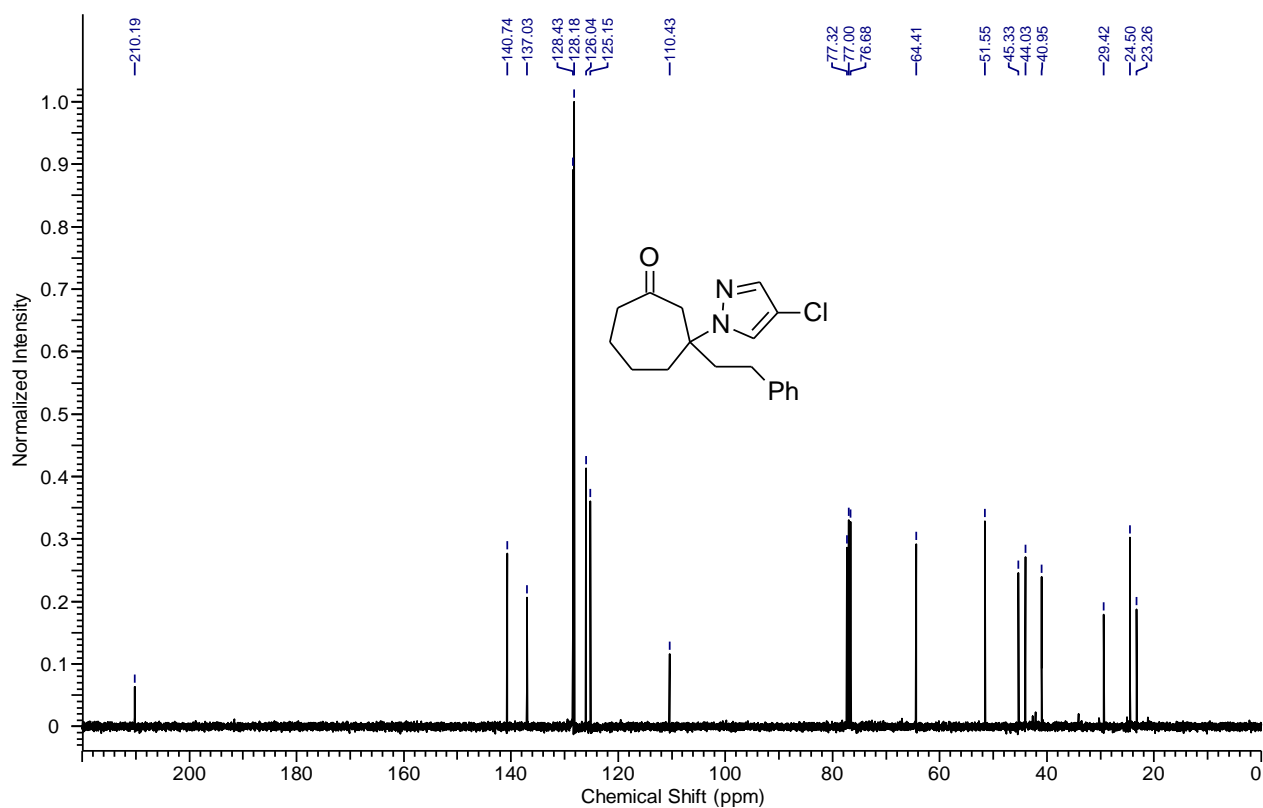

**Figure S58.**  $^{13}\text{C}$  NMR spectrum of the compound **3mc** in  $\text{CDCl}_3$ , 100 MHz

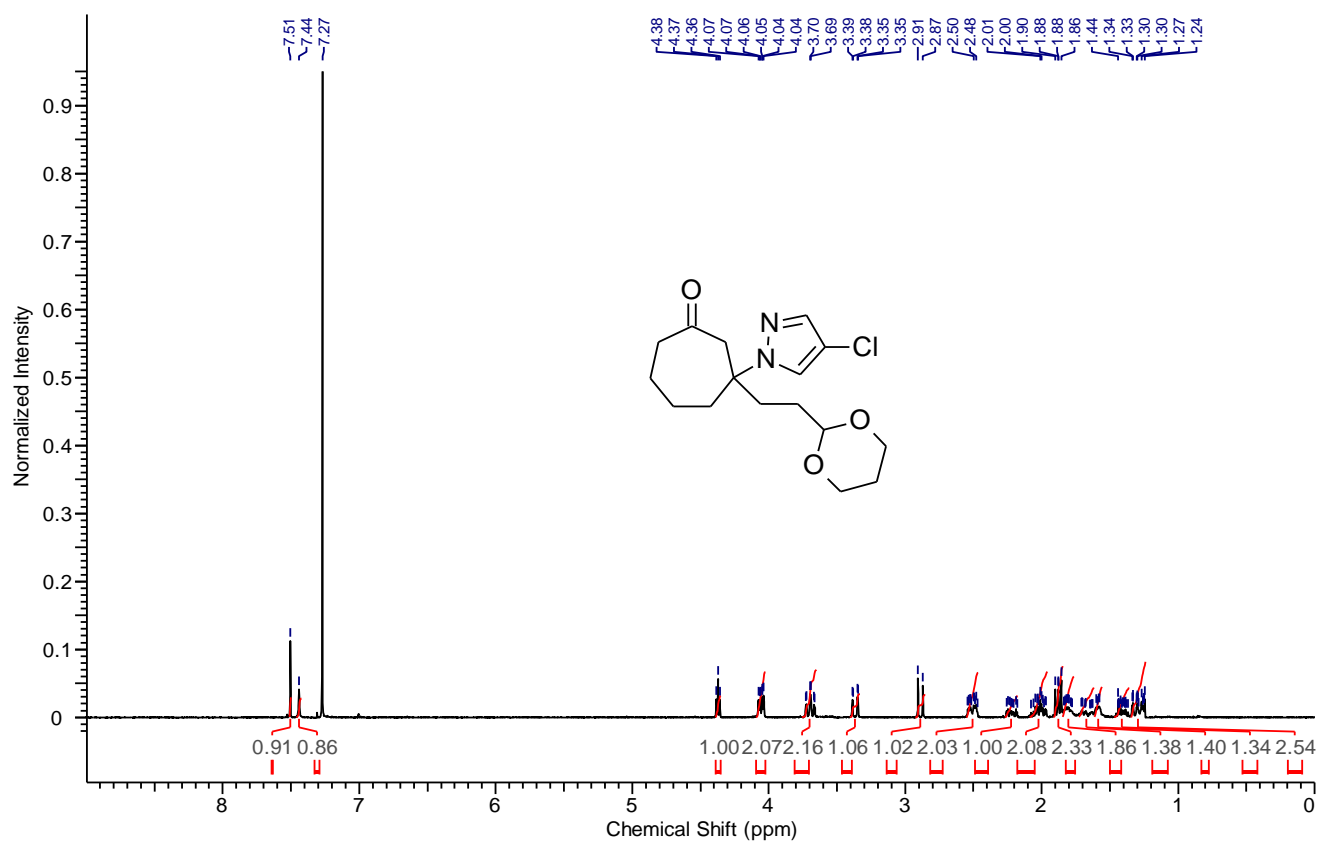

**Figure S59.**  $^1\text{H}$  NMR spectrum of the compound **3nc** in  $\text{CDCl}_3$ , 400 MHz

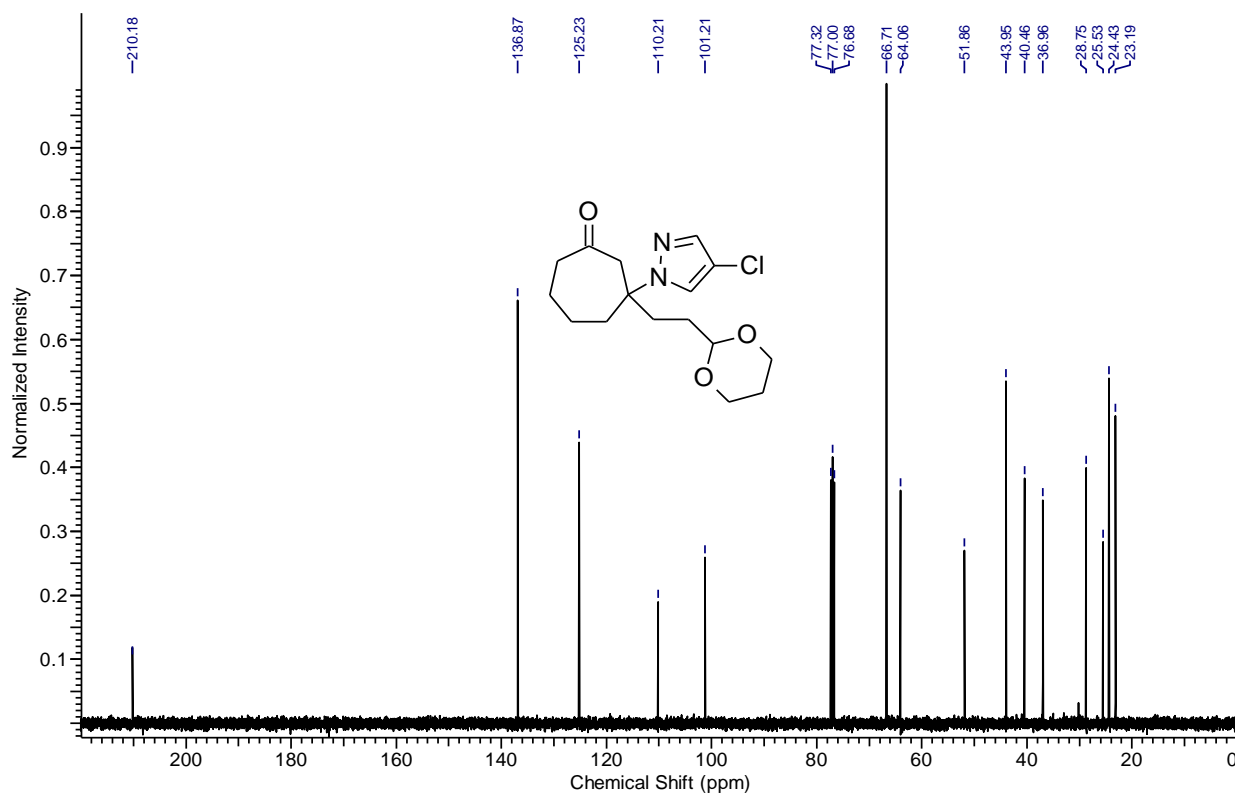

**Figure S60.**  $^{13}\text{C}$  NMR spectrum of the compound **3nc** in  $\text{CDCl}_3$ , 100 MHz

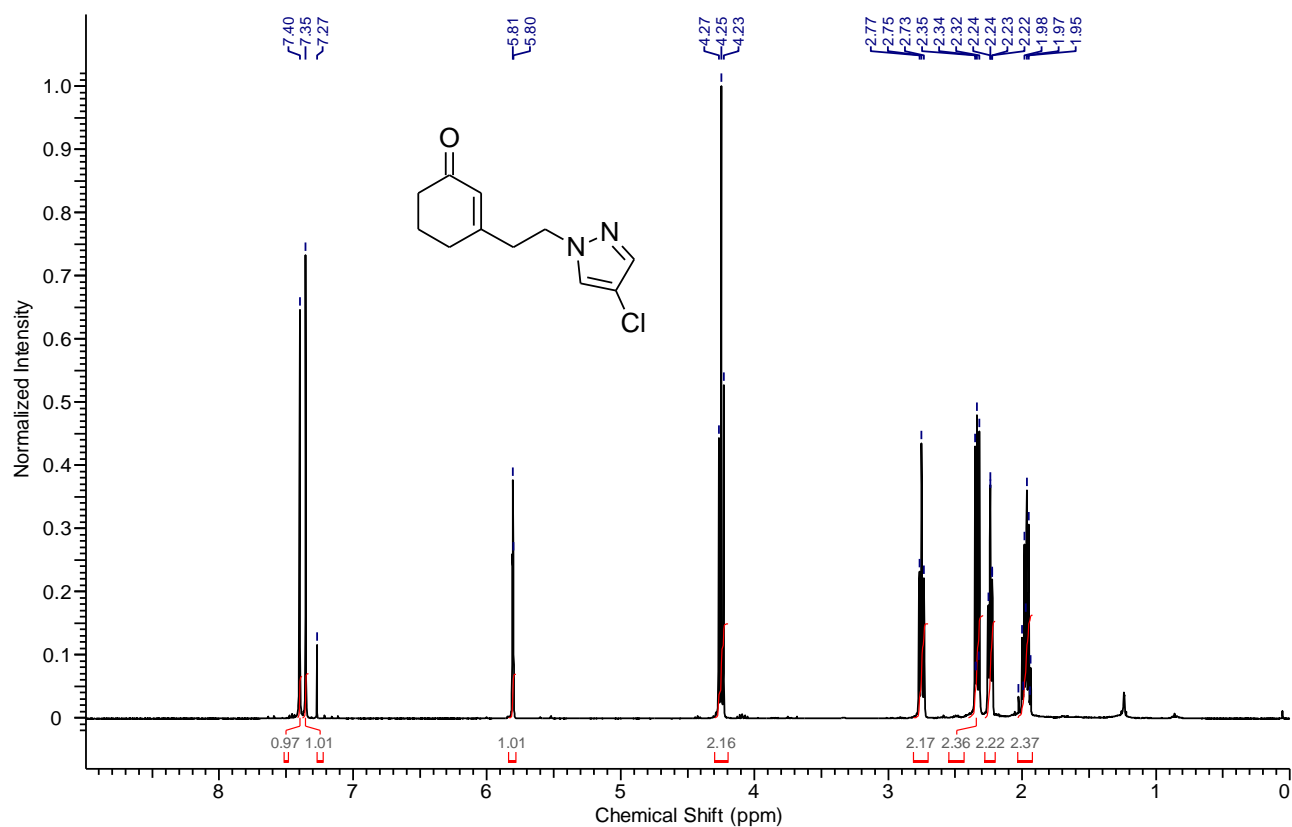

**Figure S61.**  $^1\text{H}$  NMR spectrum of the compound **30c** in  $\text{CDCl}_3$ , 400 MHz

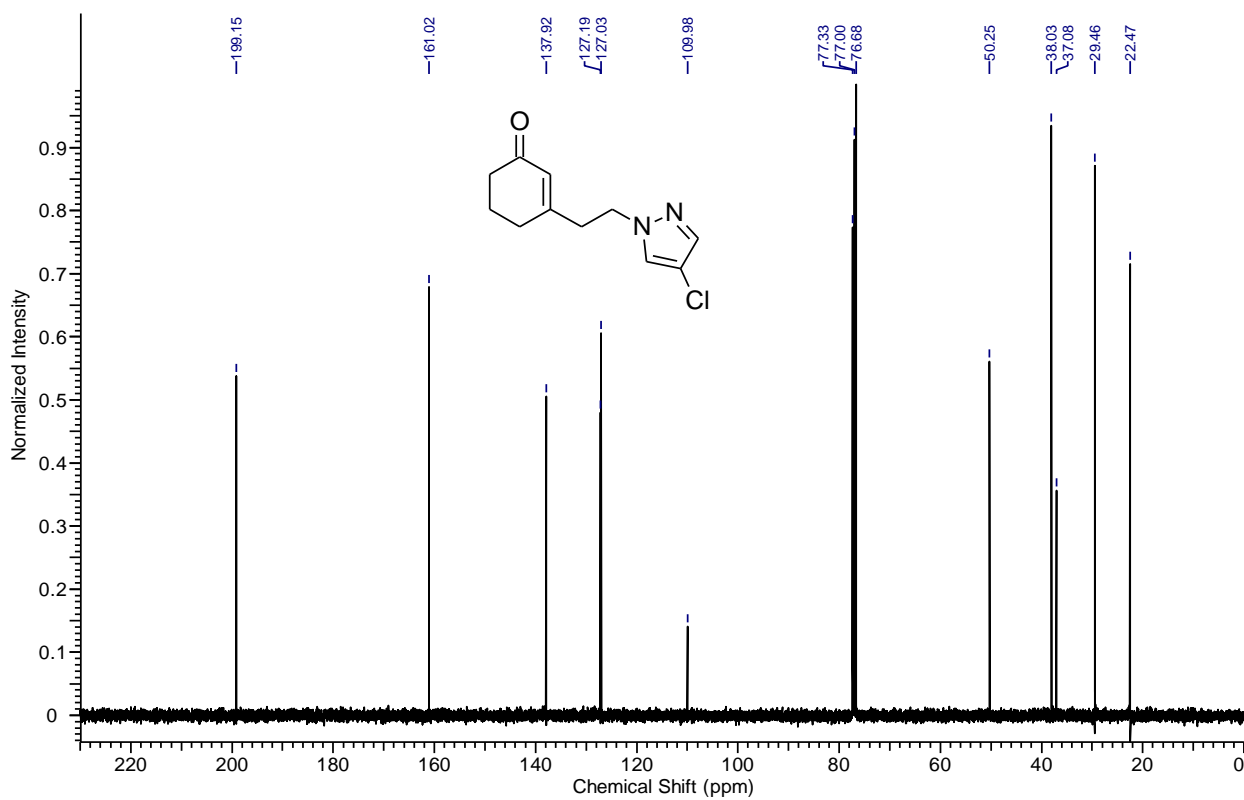

**Figure S62.**  $^{13}\text{C}$  NMR spectrum of the compound **30c** in  $\text{CDCl}_3$ , 100 MHz



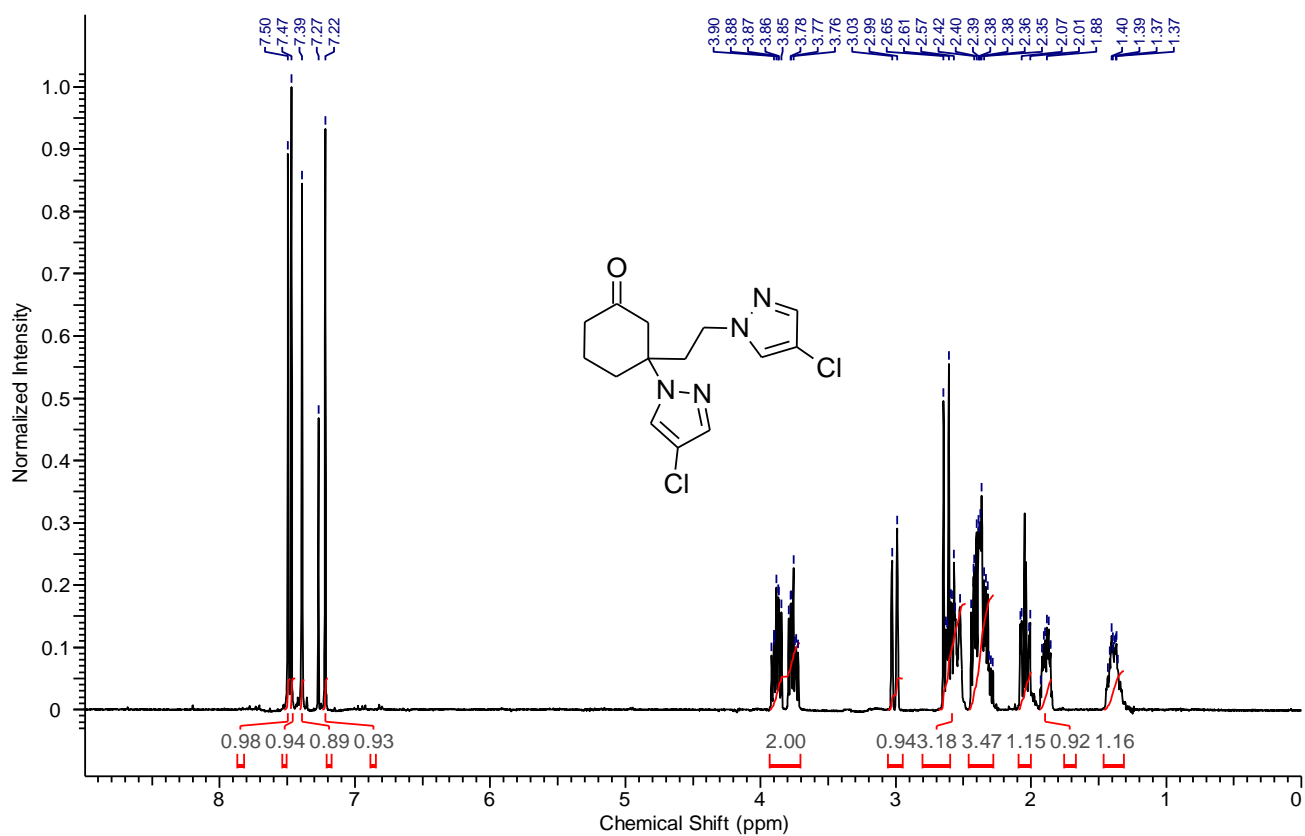

**Figure S63.** <sup>1</sup>H NMR spectrum of the compound **4a** in CDCl<sub>3</sub>, 400 MHz

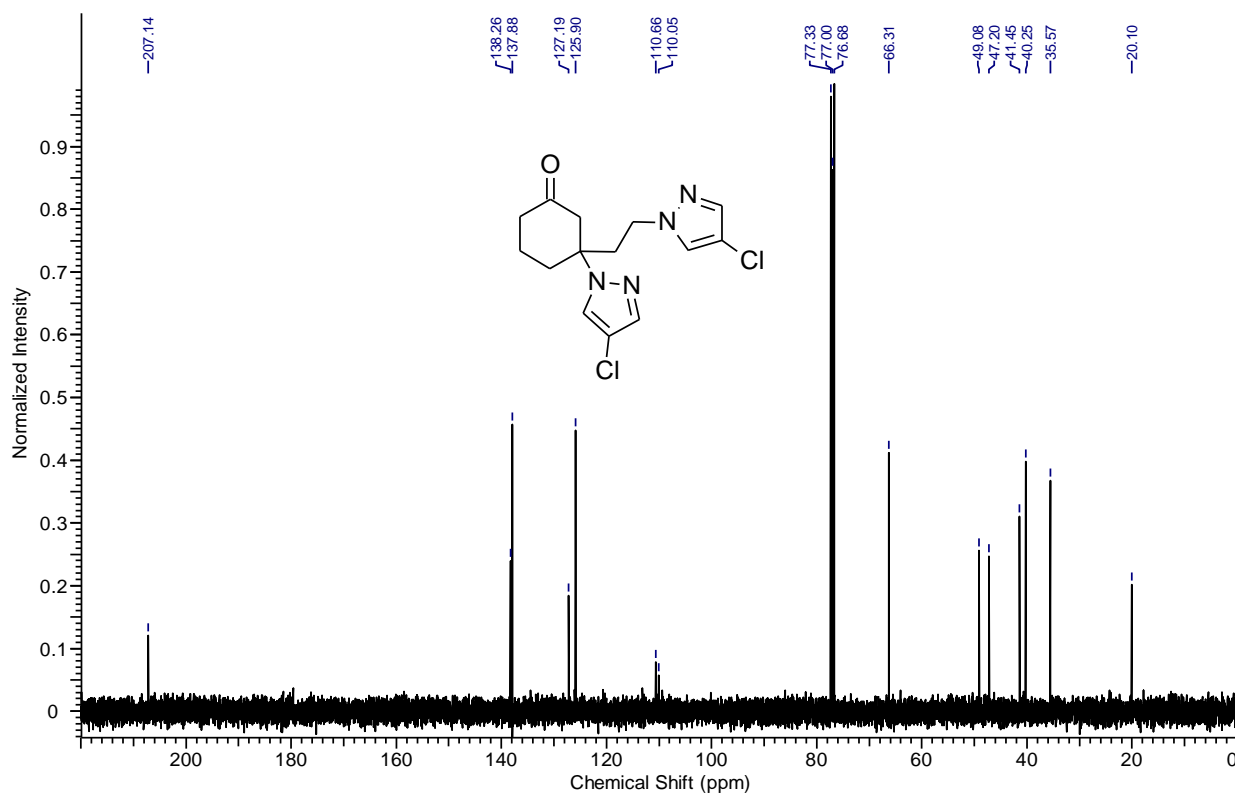

**Figure S64.** <sup>13</sup>C NMR spectrum of the compound **4a** in CDCl<sub>3</sub>, 100 MHz

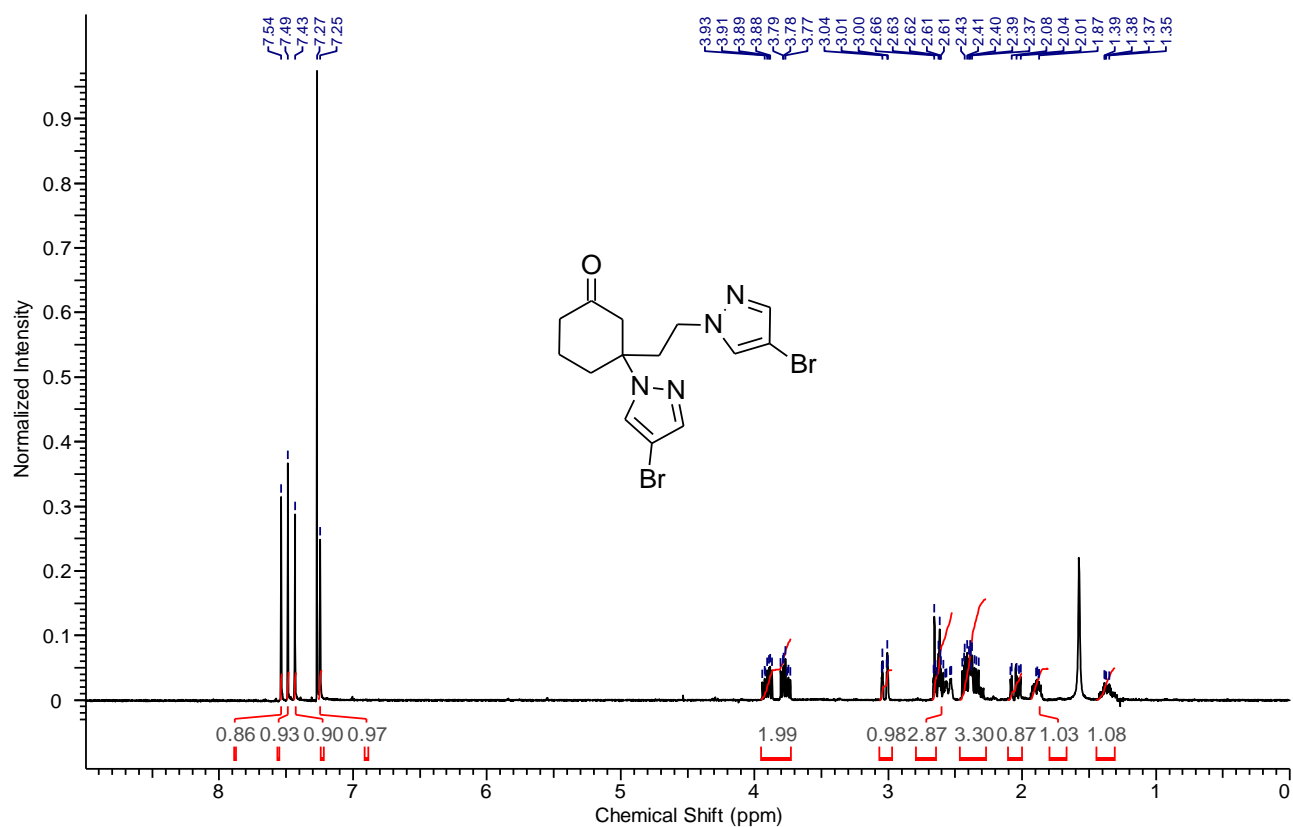

Figure S65. <sup>1</sup>H NMR spectrum of the compound **4b** in CDCl<sub>3</sub>, 400 MHz

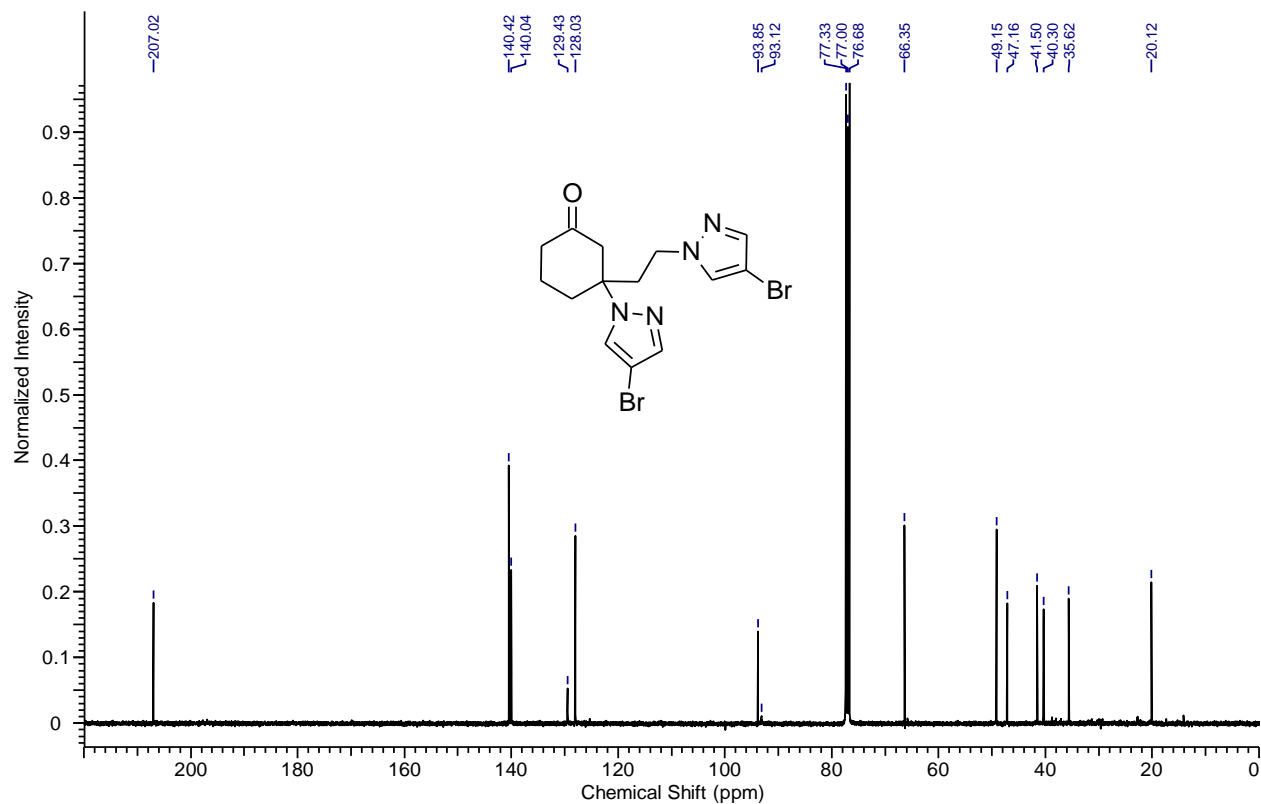

Figure S66. <sup>13</sup>C NMR spectrum of the compound **4b** in CDCl<sub>3</sub>, 100 MHz

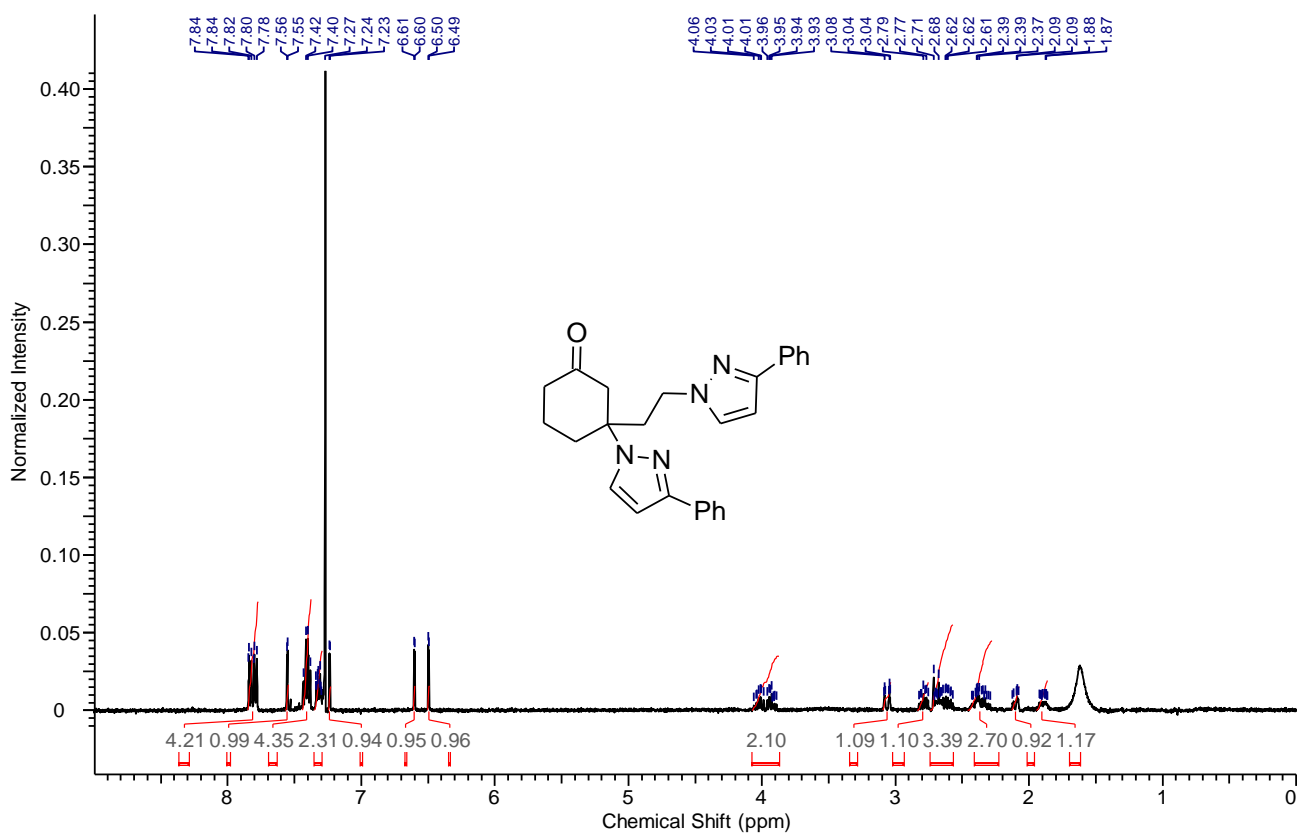

**Figure S67.**  $^1\text{H}$  NMR spectrum of the compound **4c** in  $\text{CDCl}_3$ , 400 MHz

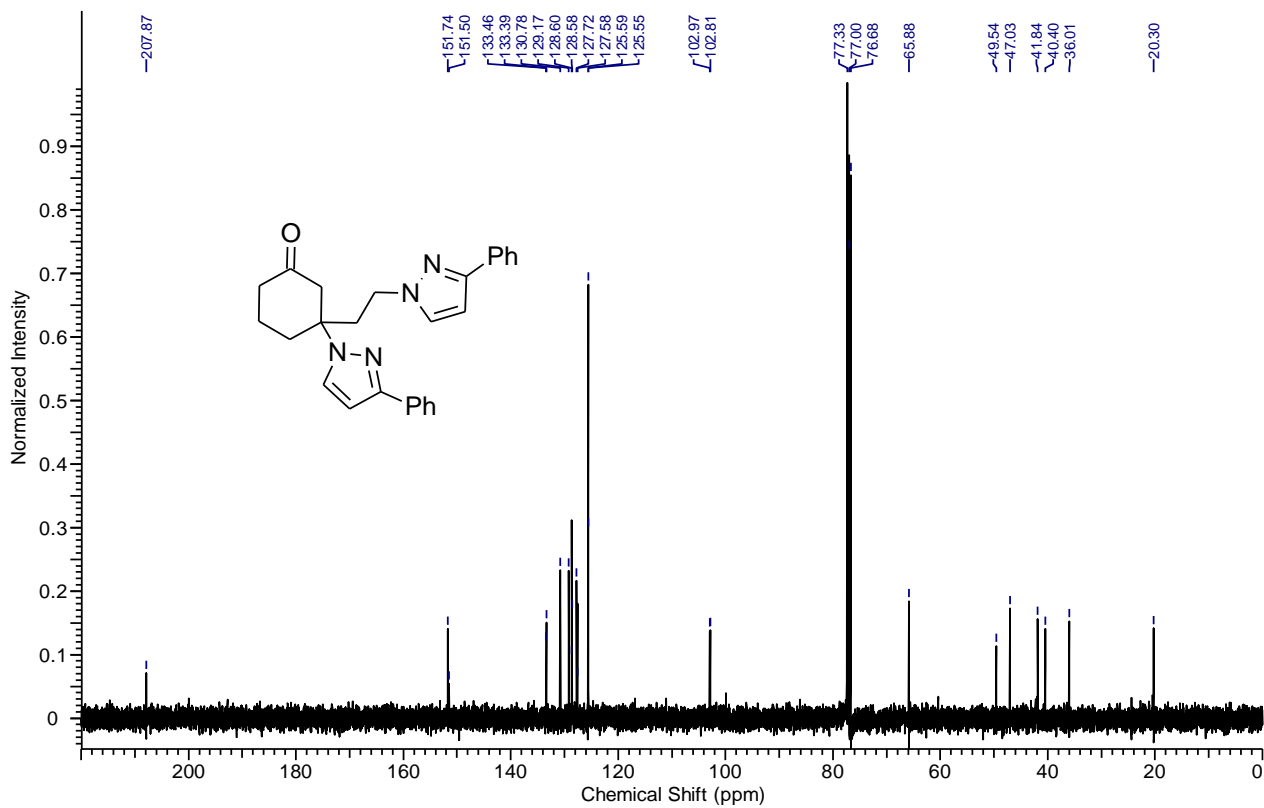

**Figure S68.**  $^{13}\text{C}$  NMR spectrum of the compound **4c** in  $\text{CDCl}_3$ , 100 MHz

■ 2D-NOESY proton NMR spectra of compound 3af, 3ah and <sup>1</sup>H NOESY correlations

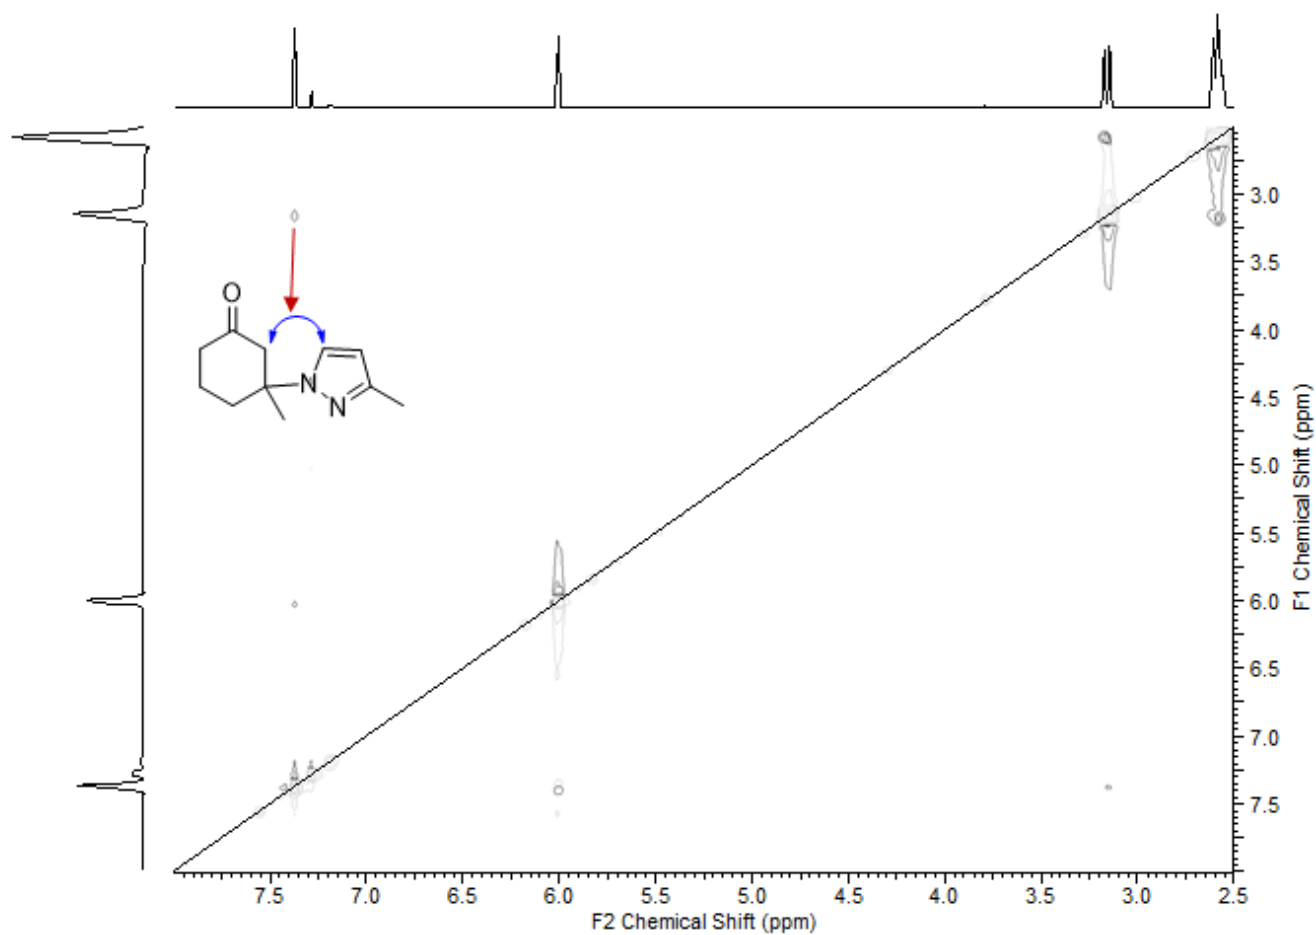

Figure S. 2D-NOESY spectrum of the compound 3af in CDCl<sub>3</sub>

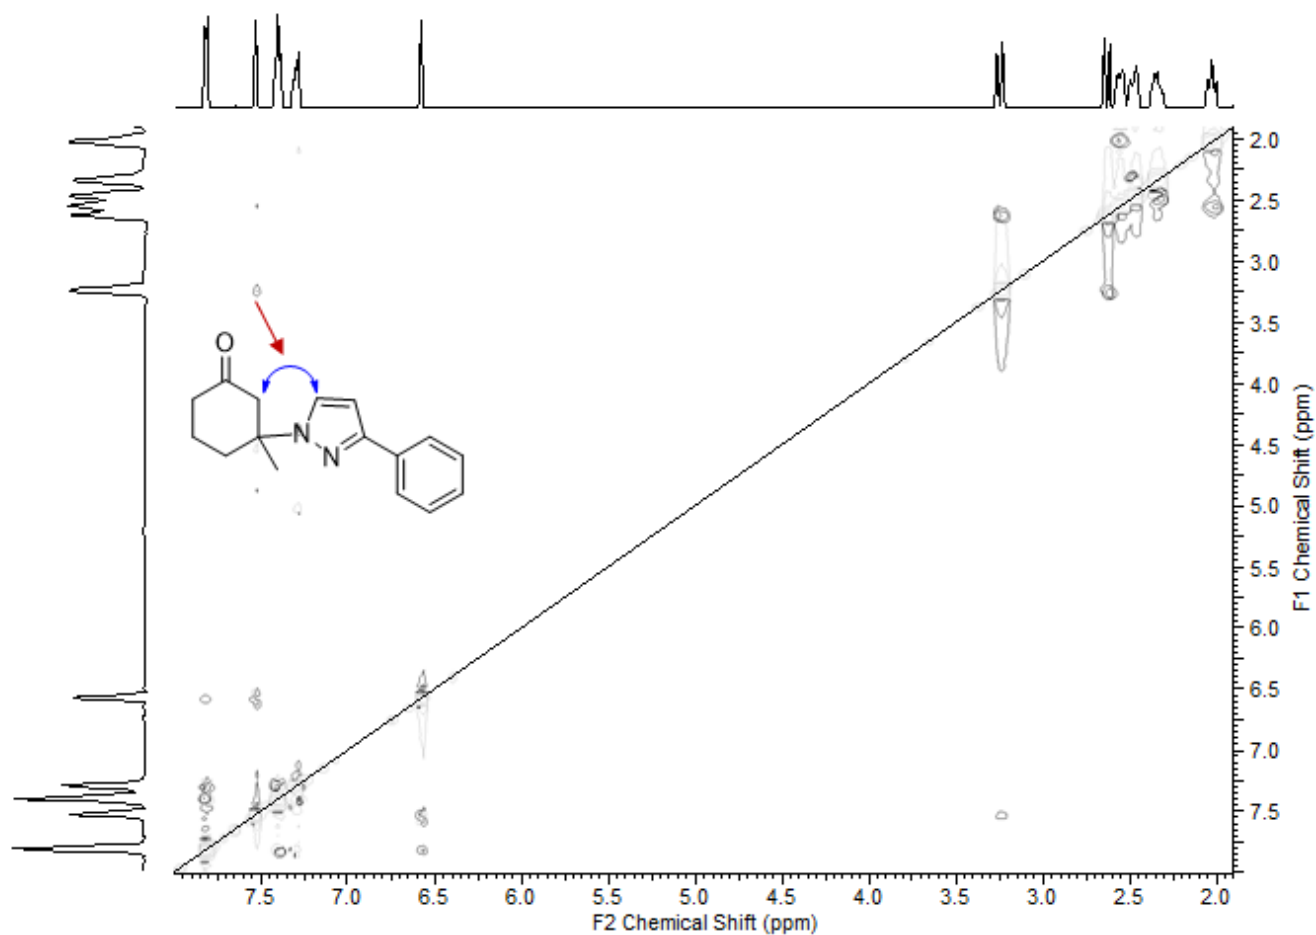

**Figure S.** 2D-NOESY spectrum of the compound **3ah** in CDCl<sub>3</sub>
